# Supplementary material for: Ir/BiphPHOX-catalyzed asymmetric hydrogenation of 3-substituted 2,5-dihydropyrroles and 2,5-dihydrothiophene 1,1-dioxides
Source: Royal Society of Chemistry journal article supplement (doi:10.1039/c7qo00248c), 2017-01-01
Supplement: c7qo00248c1.pdf [file c7qo00248c1.pdf]

## Supporting Information

# Ir/BiphPHOX-Catalyzed Asymmetric Hydrogenation of 3-Substituted 2,5-Dihydropyrroles and 2,5-Dihydrothiophene 1,1-Dioxides

Ke Meng,<sup>a</sup> Jingzhao Xia,<sup>b</sup> Yanzhao Wang,<sup>c</sup> Xinghua Zhang,<sup>\*a</sup> Guoqiang Yang<sup>\*c</sup> and Wanbin Zhang<sup>\*b,c</sup>

<sup>a</sup>*School of Chemical and Environmental Engineering, Shanghai Institute of Technology, 100 Haiquan Road, Shanghai 201418, China.*

<sup>b</sup>*School of Pharmacy, Shanghai Jiao Tong University, 800 Dongchuan Road, Shanghai 200240, China.*

<sup>c</sup>*School of Chemistry and Chemical Engineering, Shanghai Jiao Tong University, 800 Dongchuan Road, Shanghai 200240, China. E-mail: wanbin@sjtu.edu.cn, Homepage: <http://wanbin.sjtu.edu.cn>.*

### Table of Contents

|                                                                    |     |
|--------------------------------------------------------------------|-----|
| 1. General Details.....                                            | S2  |
| 2. Preparation of Starting Materials.....                          | S2  |
| 3. General Procedure for Asymmetric Hydrogenation.....             | S10 |
| 4. Transformation of Hydrogenation Product <b>2a</b> .....         | S19 |
| 5. NMR Spectra and HPLC Charts.....                                | S20 |
| 6. Single Crystal of Enantioenriched <b>2a</b> and <b>4a</b> ..... | S94 |
| 7. References.....                                                 | S94 |

## 1. General Details.

All reactions were performed in flame-dried glassware under an atmosphere of dried argon, and the workup was carried out in air, unless otherwise noted. Solvents were dried and distilled through standard procedures. Commercially available reagents were used without further purification.  $^1\text{H}$  NMR (400 MHz) and  $^{13}\text{C}$  NMR (100 MHz) spectra were recorded on a Varian MERCURY plus-400 spectrometer. HRMS was performed on a Waters Micromass Q-TOF Premier Mass Spectrometer at the Instrumental Analysis Center of Shanghai Jiao Tong University. The *ee* values were determined by HPLC using Daicel chiral columns. Melting points were measured with SGW X-4 micro melting point apparatus. Optical rotations were measured on a Rudolph Research Analytical Autopol VI automatic polarimeter using a 50 mm path-length cell at 589 nm. The absolute configuration of hydrogenated products was determined by the single crystal of **2a** and **4a**.

## 2. Preparation of Starting Materials.

### 2.1. General Procedure for the Synthesis of the Substrates.<sup>[1]</sup>

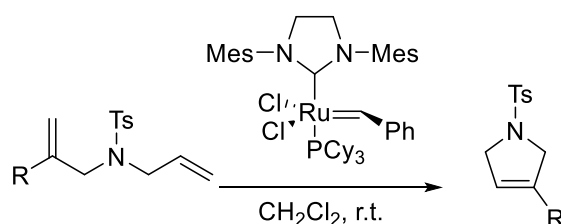

**Procedure 1:** Diene (xx mmol) and Grubbs 2:nd generation catalyst (4 mol%) were dissolved in dry dichloromethane (70 ml/mmol) and the solution stirred at room temperature over night. The reaction was quenched with water (20 mL), and extracted with DCM (30 mL $\times$ 3). The organic layers were combined, washed with brine (10 mL), dried by anhydrous Na<sub>2</sub>SO<sub>4</sub> and filtered. The filtrate was concentrated under reduced pressure. The residue was purified with 200-300 mesh silica gel column chromatography to give the corresponding products.

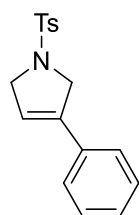

**1a** **3-Phenyl-1-tosyl-2,5-dihydro-1H-pyrrole (1a).** White solid, 77% yield, mp = 137.4 – 139.0 °C.  $^1\text{H}$  NMR (400 MHz, CDCl<sub>3</sub>)  $\delta$  7.78 – 7.75 (m, 2H), 7.34 – 7.26 (m, 7H), 6.02 – 6.00 (m, 1H), 4.50 – 4.47 (m, 2H), 4.32 – 4.29 (m, 2H), 2.41 (s, 3H).  $^{13}\text{C}$  NMR (100 MHz, CDCl<sub>3</sub>)  $\delta$  143.8, 137.5, 134.2, 132.7, 130.1, 128.9, 128.7, 127.7, 125.6, 119.1, 55.9, 55.1, 21.8. HRMS (FT-MS) calcd for C<sub>17</sub>H<sub>17</sub>NO<sub>2</sub>S (M + Na)<sup>+</sup>: 322.0878; found: 322.0878.

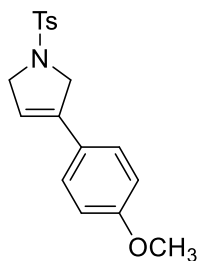

**1b**

**3-(4-Methoxyphenyl)-1-tosyl-2,5-dihydro-1H-pyrrole (1b).** White solid, 48%

yield, mp = 138.0 – 138.5 °C. <sup>1</sup>H NMR (400 MHz, CDCl<sub>3</sub>) δ 7.77 – 7.75 (m, 2H), 7.32 (d, *J* = 7.6 Hz, 2H), 7.24 – 7.20 (m, 2H), 6.87 – 6.83 (m, 2H), 5.86 – 5.85 (m, 1H), 4.46 – 4.43 (m, 2H), 4.29 – 4.27 (m, 2H), 3.80 (s, 3H), 2.41 (s, 3H). <sup>13</sup>C NMR (100 MHz, CDCl<sub>3</sub>) δ 159.7, 143.5, 136.7, 134.1, 129.8, 127.5, 126.7, 125.3, 116.6, 114.1, 55.7, 55.3, 55.0, 21.5. HRMS (FT-MS) calcd for C<sub>18</sub>H<sub>19</sub>NO<sub>3</sub>S (M+Na)<sup>+</sup>: 352.0983; found: 352.0986.

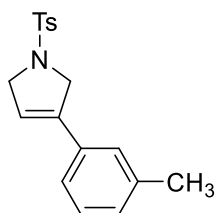

**1c**

**3-(*m*-Tolyl)-1-tosyl-2,5-dihydro-1H-pyrrole (1c).** White solid, 50% yield, mp

= 112.5 – 114.0 °C. <sup>1</sup>H NMR (400 MHz, CDCl<sub>3</sub>) δ 7.78 – 7.76 (m, 2H), 7.32 (d, *J* = 8.4 Hz, 2H), 7.23 – 7.19 (m, 1H), 7.09 (d, *J* = 7.6 Hz, 3H), 5.99 – 5.97 (m, 1H), 4.49 – 4.46 (m, 2H), 4.31 – 4.28 (m, 2H), 2.41 (s, 3H), 2.33 (s, 3H). <sup>13</sup>C NMR (100 MHz, CDCl<sub>3</sub>) δ 143.6, 138.3, 137.4, 134.0, 132.4, 129.8, 129.2, 128.6, 127.5, 126.1, 122.5, 118.7, 55.7, 55.0, 21.5, 21.4. HRMS (FT-MS) calcd for C<sub>18</sub>H<sub>19</sub>NO<sub>2</sub>S (M + Na)<sup>+</sup>: 336.1034; found: 336.1035.

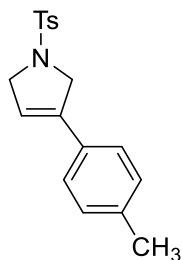

**1d**

**3-(*p*-Tolyl)-1-tosyl-2,5-dihydro-1H-pyrrole (1d).** White solid, 55% yield, mp =

143.1 – 144.8 °C. <sup>1</sup>H NMR (400 MHz, CDCl<sub>3</sub>) δ 7.76 (d, *J* = 8.4 Hz, 2H), 7.32 (d, *J* = 8.0 Hz, 2H), 7.18 (d, *J* = 8.4 Hz, 2H), 7.12 (d, *J* = 8.4 Hz, 2H), 5.94 – 5.93 (m, 1H), 4.47 – 4.45 (m, 2H), 4.30 – 4.27 (m, 2H), 2.41 (s, 3H), 2.33 (s, 3H). <sup>13</sup>C NMR (100 MHz, CDCl<sub>3</sub>) δ 143.6, 138.4, 137.2, 134.1, 129.8, 129.7, 129.4, 127.5, 125.3, 117.8, 55.7, 55.0, 21.5, 21.2. HRMS (FT-MS) calcd for C<sub>18</sub>H<sub>19</sub>NO<sub>2</sub>S (M + Na)<sup>+</sup>: 336.1034; found: 336.1032.

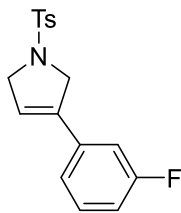

**1e** **3-(3-Fluorophenyl)-1-tosyl-2,5-dihydro-1H-pyrrole (1e).** White solid, 48%

yield, mp = 144.6 – 146.6 °C. <sup>1</sup>H NMR (400 MHz, CDCl<sub>3</sub>) δ 7.77 (d, *J* = 8.4 Hz, 2H), 7.33 (d, *J* = 8.4 Hz, 2H), 7.31 – 7.28 (m, 1H), 7.03 (d, *J* = 7.6 Hz, 1H), 7.01 – 6.96 (m, 2H), 6.05 – 6.02 (m, 1H), 4.46 – 4.43 (m, 2H), 4.32 – 4.29 (m, 2H), 2.42 (s, 3H). <sup>13</sup>C NMR (100 MHz, CDCl<sub>3</sub>) δ 163.1 (d, *J*<sub>C-F</sub> = 244.9 Hz), 143.9, 136.6, 134.8 (d, *J*<sub>C-F</sub> = 7.9 Hz), 134.1, 130.5 (d, *J*<sub>C-F</sub> = 8.3 Hz), 130.1, 127.7, 121.3 (d, *J*<sub>C-F</sub> = 1.8 Hz), 120.6, 115.5 (d, *J*<sub>C-F</sub> = 21.2 Hz), 112.5 (d, *J*<sub>C-F</sub> = 22.1 Hz), 55.8, 55.0, 21.8. HRMS (FT-MS) calcd for C<sub>17</sub>H<sub>16</sub>FNO<sub>2</sub>S (M + Na)<sup>+</sup>: 340.0783; found: 340.0783.

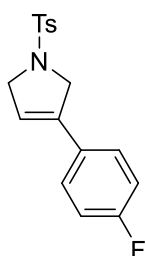

**1f** **3-(4-Fluorophenyl)-1-tosyl-2,5-dihydro-1H-pyrrole (1f).** White solid, 46% yield,

mp = 117.2 – 119.1 °C. <sup>1</sup>H NMR (400 MHz, CDCl<sub>3</sub>) δ 7.77 (d, *J* = 8.4 Hz, 2H), 7.33 (d, *J* = 8.0 Hz, 2H), 7.27 – 7.24 (m, 2H), 7.04 – 6.99 (m, 2H), 5.95 – 5.93 (m, 1H), 4.46 – 4.43 (m, 2H), 4.31 – 4.28 (m, 2H), 2.42 (s, 3H). <sup>13</sup>C NMR (100 MHz, CDCl<sub>3</sub>) δ 163.6 (d, *J*<sub>C-F</sub> = 247.2 Hz), 143.7, 136.3, 134.0, 129.9, 128.7 (d, *J*<sub>C-F</sub> = 3.4 Hz), 127.5, 127.1 (d, *J*<sub>C-F</sub> = 8.1 Hz), 118.7 (d, *J*<sub>C-F</sub> = 2.0 Hz), 115.7 (d, *J*<sub>C-F</sub> = 21.6 Hz), 55.6, 54.9, 21.5. HRMS (FT-MS) calcd for C<sub>17</sub>H<sub>16</sub>FNO<sub>2</sub>S (M + Na)<sup>+</sup>: 340.0783; found: 340.0782.

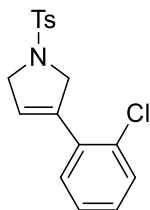

**1g** **3-(2-Chlorophenyl)-1-tosyl-2,5-dihydro-1H-pyrrole (1g).** White solid, 41% yield,

mp = 142.5 – 144.2 °C. <sup>1</sup>H NMR (400 MHz, CDCl<sub>3</sub>) δ 7.78 – 7.75 (m, 2H), 7.34 – 7.28 (m, 4H), 7.22 – 7.19 (m, 2H), 6.01 – 5.99 (m, 1H), 4.46 – 4.43 (m, 2H), 4.31 – 4.28 (m, 2H), 2.42 (s, 3H). <sup>13</sup>C NMR (100 MHz, CDCl<sub>3</sub>) δ 143.7, 136.3, 134.2, 134.0, 131.0, 129.9, 128.9, 127.5, 126.7, 119.6, 55.6, 54.8, 21.6. HRMS (FT-MS) calcd for C<sub>17</sub>H<sub>16</sub>ClNO<sub>2</sub>S (M + Na)<sup>+</sup>: 356.0488; found: 356.0487.

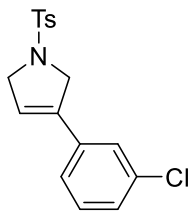

**1h** **3-(3-Chlorophenyl)-1-tosyl-2,5-dihydro-1H-pyrrole (1h).** White solid, 46%

yield, mp = 128.8 – 130.0 °C. <sup>1</sup>H NMR (400 MHz, CDCl<sub>3</sub>) δ 7.77 (d, *J* = 8.4 Hz, 2H), 7.33 (d, *J* = 8.0 Hz, 2H), 7.26 (d, *J* = 4.0 Hz, 3H), 7.17 – 7.14 (m, 1H), 6.05 – 6.03 (m, 1H), 4.46 – 4.43 (m, 2H), 4.32 – 4.29 (m, 2H), 2.42 (s, 3H). <sup>13</sup>C NMR (100 MHz, CDCl<sub>3</sub>) δ 143.7, 136.2, 134.7, 134.2, 134.0, 129.9, 129.9, 128.4, 127.5, 125.6, 123.5, 120.5, 55.6, 54.8, 21.6. HRMS (FT-MS) calcd for C<sub>17</sub>H<sub>16</sub>ClNO<sub>2</sub>S (M + Na)<sup>+</sup>: 356.0488; found: 356.0489.

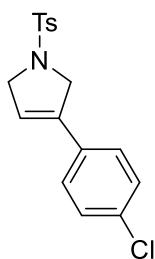

**1i** **3-(4-Chlorophenyl)-1-tosyl-2,5-dihydro-1H-pyrrole (1i).** White solid, 49% yield,

mp = 130.0 – 131.5 °C. <sup>1</sup>H NMR (400 MHz, CDCl<sub>3</sub>) δ 7.78 – 7.75 (m, 2H), 7.34 – 7.28 (m, 4H), 7.22 – 7.19 (m, 2H), 6.01 – 5.99 (m, 1H), 4.46 – 4.43 (m, 2H), 4.31 – 4.28 (m, 2H), 2.42 (s, 3H). <sup>13</sup>C NMR (100 MHz, CDCl<sub>3</sub>) δ 143.7, 136.3, 134.2, 134.0, 131.0, 130.0, 128.9, 127.5, 126.7, 119.6, 55.6, 54.8, 21.6. HRMS (FT-MS) calcd for C<sub>17</sub>H<sub>16</sub>ClNO<sub>2</sub>S (M + Na)<sup>+</sup>: 356.0488; found: 356.0485.

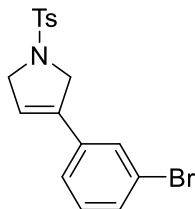

**1j** **3-(3-Bromophenyl)-1-tosyl-2,5-dihydro-1H-pyrrole (1j).** White solid, 56%

yield, mp = 127.2 – 128.9 °C. <sup>1</sup>H NMR (400 MHz, CDCl<sub>3</sub>) δ 7.78 – 7.76 (m, 2H), 7.41 – 7.39 (m, 2H), 7.34 – 7.32 (m, 2H), 7.21 – 7.17 (m, 2H), 6.04 – 6.02 (m, 1H), 4.45 – 4.42 (m, 2H), 4.32 – 4.29 (m, 2H), 2.42 (s, 3H). <sup>13</sup>C NMR (100 MHz, CDCl<sub>3</sub>) δ 143.7, 136.1, 134.5, 133.9, 131.3, 130.2, 129.9, 128.5, 127.5, 124.0, 122.9, 120.6, 55.6, 54.7, 21.6. HRMS (FT-MS) calcd for C<sub>17</sub>H<sub>16</sub>BrNO<sub>2</sub>S (M + Na)<sup>+</sup>: 399.9983; found: 399.9984.

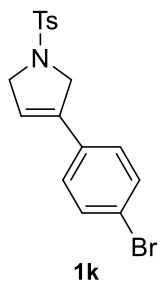

**1k**

**3-(4-Bromophenyl)-1-tosyl-2,5-dihydro-1H-pyrrole (1k)** white solid, 57% yield,

mp = 136.9 – 138.8 °C. <sup>1</sup>H NMR (400 MHz, CDCl<sub>3</sub>) δ 7.76 (d, *J* = 8.0 Hz, 2H), 7.45 (d, *J* = 8.4 Hz, 2H), 7.33 (d, *J* = 8.0 Hz, 2H), 7.14 (d, *J* = 8.4 Hz, 2H), 6.03 – 6.01 (m, 1H), 4.46 – 4.43 (m, 2H), 4.30 – 4.27 (m, 2H), 2.42 (s, 3H). <sup>13</sup>C NMR (100 MHz, CDCl<sub>3</sub>) δ 143.7, 136.4, 134.0, 131.8, 131.4, 129.9, 127.5, 126.9, 122.4, 119.8, 55.7, 54.7, 21.6. HRMS (FT-MS) calcd for C<sub>17</sub>H<sub>16</sub>BrNO<sub>2</sub>S (M+Na)<sup>+</sup>: 399.9983; found: 399.9983.

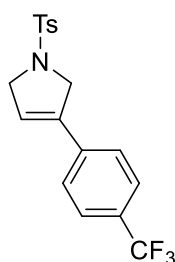

**1l**

**1-Tosyl-3-(4-(trifluoromethyl)phenyl)-2,5-dihydro-1H-pyrrole (1l)**. white solid,

42% yield, mp = 157.8 – 158.9 °C. <sup>1</sup>H NMR (400 MHz, CDCl<sub>3</sub>) δ 7.77 (d, *J* = 8.4 Hz, 2H), 7.58 (d, *J* = 8.0 Hz, 2H), 7.38 (d, *J* = 8.4 Hz, 2H), 7.34 (d, *J* = 7.6 Hz, 2H), 6.15 – 6.13 (m, 1H), 4.51 – 4.48 (m, 2H), 4.35 – 4.32 (m, 2H), 2.42 (s, 3H). <sup>13</sup>C NMR (101 MHz, CDCl<sub>3</sub>) δ 143.8, 136.3, 135.8 (q, *J*<sub>C-F</sub> = 1.3 Hz), 134.0, 130.3 (q, *J*<sub>C-F</sub> = 32.4 Hz), 129.9, 127.5, 125.7 (q, *J*<sub>C-F</sub> = 3.7 Hz), 125.7, 123.9 (q, *J*<sub>C-F</sub> = 270.3 Hz), 121.7, 55.7, 54.7, 21.6. HRMS (FT-MS) calcd for C<sub>18</sub>H<sub>16</sub>F<sub>3</sub>NO<sub>2</sub>S (M + Na)<sup>+</sup>: 390.0752; found: 390.0753.

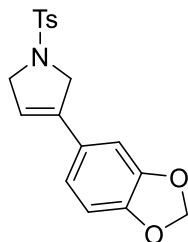

**1m**

**3-(Benzo[d][1,3]dioxol-5-yl)-1-tosyl-2,5-dihydro-1H-pyrrole (1m)**. White

solid, 60% yield, mp = 145.5 – 147.5 °C. <sup>1</sup>H NMR (400 MHz, CDCl<sub>3</sub>) δ 7.76 (d, *J* = 8.4 Hz, 2H), 7.32 (d, *J* = 8.0 Hz, 2H), 6.81 (d, *J* = 1.6 Hz, 1H), 6.75 (d, *J* = 8.0 Hz, 1H), 6.71 – 6.69 (m, 1H), 5.96 (s, 2H), 5.84 – 5.83 (m, 1H), 4.42 – 4.40 (m, 2H), 4.29 – 4.27 (m, 2H), 2.42 (s, 3H). <sup>13</sup>C NMR (100 MHz, CDCl<sub>3</sub>) δ 148.3, 148.0, 143.8, 137.0, 134.2, 130.1, 127.7, 127.0, 119.6, 117.6, 108.5, 105.8, 101.5, 55.8, 55.2, 21.8. HRMS (FT-MS) calcd for C<sub>18</sub>H<sub>17</sub>NO<sub>4</sub>S (M + Na)<sup>+</sup>: 366.0776; found: 366.0775.

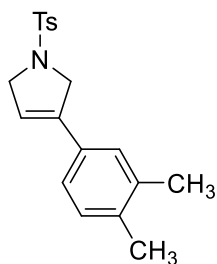

**1n** **3-(3,4-Dimethylphenyl)-1-tosyl-2,5-dihydro-1H-pyrrole (1n)**. White soild, 66% yield, mp = 157.8 – 159.0 °C. <sup>1</sup>H NMR (400 MHz, CDCl<sub>3</sub>) δ 7.76 (d, *J* = 8.4 Hz, 2H), 7.31 (d, *J* = 8.4 Hz, 2H), 7.09 – 7.01 (m, 3H), 5.93 – 5.92 (m, 1H), 4.47 – 4.44 (m, 2H), 4.29 – 4.27 (m, 2H), 2.41 (s, 3H), 2.24 (s, 6H). <sup>13</sup>C NMR (100 MHz, CDCl<sub>3</sub>) δ 143.5, 137.3, 137.2, 136.9, 134.1, 130.1, 129.9, 129.8, 127.5, 126.6, 122.8, 117.6, 55.7, 55.0, 21.5, 19.8, 19.6. HRMS (FT-MS) calcd for C<sub>19</sub>H<sub>21</sub>NO<sub>2</sub>S (M + Na)<sup>+</sup>: 350.1191; found: 350.1193.

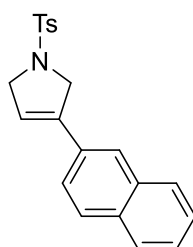

**1o** **3-(Naphthalen-2-yl)-1-tosyl-2,5-dihydro-1H-pyrrole (1o)**. White soild, 68% yield, mp = 178.6 – 179.8 °C. <sup>1</sup>H NMR (400 MHz, CDCl<sub>3</sub>) δ 7.81 – 7.76 (m, 5H), 7.57 (s, 1H), 7.53 – 7.45 (m, 3H), 7.33 (d, *J* = 8.0 Hz, 2H), 6.14 – 6.13 (m, 1H), 4.63 – 4.60 (m, 2H), 4.37 – 4.34 (m, 2H), 2.41 (s, 3H). <sup>13</sup>C NMR (100 MHz, CDCl<sub>3</sub>) δ 143.6, 137.3, 134.1, 133.2, 133.1, 129.9, 129.8, 128.4, 128.2, 127.7, 127.5, 126.7, 126.5, 124.6, 123.1, 119.5, 55.8, 55.0, 21.5. HRMS (FT-MS) calcd for C<sub>21</sub>H<sub>19</sub>NO<sub>2</sub>S (M + Na)<sup>+</sup>: 372.1034; found: 372.1035.

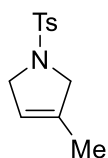

**1p** **3-Methyl-1-tosyl-2,5-dihydro-1H-pyrrole (1p)**. White soild, 60% yield, mp = 94.0 – 94.9 °C. <sup>1</sup>H NMR (400 MHz, CDCl<sub>3</sub>) δ 7.74 – 7.70 (m, 2H), 7.33 – 7.31 (m, 2H), 5.26 – 5.24 (m, 1H), 4.07 – 4.06 (m, 2H), 3.97 – 3.96 (m, 2H), 2.43 (s, 3H), 1.66 (d, *J* = 1.6 Hz, 3H). <sup>13</sup>C NMR (100 MHz, CDCl<sub>3</sub>) δ 143.6, 135.3, 134.4, 130.0, 127.7, 119.3, 57.9, 55.4, 21.8, 14.3. HRMS (FT-MS) calcd for C<sub>12</sub>H<sub>15</sub>NO<sub>2</sub>S (M + Na)<sup>+</sup>: 260.0721; found: 260.0721.

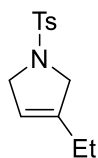

**1q** **3-Ethyl-1-tosyl-2,5-dihydro-1H-pyrrole (1q)**. White soild, 37% yield, mp = 79.2 – 81.2 °C. <sup>1</sup>H NMR (400 MHz, CDCl<sub>3</sub>) δ 7.73 – 7.71 (m, 2H), 7.33 – 7.31 (m, 2H), 5.26 – 5.24 (m, 1H), 4.10 – 4.05 (m, 2H), 4.02 – 3.99 (m, 2H), 2.43 (s, 3H), 2.02 – 1.96 (m, 2H), 1.00 (t, *J* = 7.6 Hz, 3H). <sup>13</sup>C NMR (101 MHz, CDCl<sub>3</sub>) δ 143.3, 141.2, 134.3, 129.7, 127.5, 117.0, 56.5, 55.1, 21.7,

21.5, 11.7. HRMS (FT-MS) calcd for C<sub>13</sub>H<sub>17</sub>NO<sub>2</sub>S (M + Na)<sup>+</sup>: 274.0878; found: 274.0875.

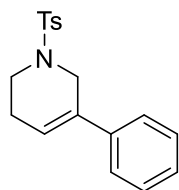

**1r**

**5-Phenyl-1-tosyl-1,2,3,6-tetrahydropyridine(1r).** White solid, 63% yield, mp = 111.8 – 112.6 °C. <sup>1</sup>H NMR (400 MHz, CDCl<sub>3</sub>) δ 7.73 – 7.71 (m, 2H), 7.34 – 7.24 (m, 7H), 6.08 – 6.06 (m, 1H), 3.95 – 3.94 (m, 2H), 3.25 – 3.22 (m, 2H), 2.42 (s, 3H), 2.41 – 2.36 (m, 2H). <sup>13</sup>C NMR (100 MHz, CDCl<sub>3</sub>) δ 143.6, 138.7, 133.5, 133.4, 129.7, 128.5, 127.7, 125.2, 122.2, 46.4, 42.4, 25.7, 21.6. HRMS (FT-MS) calcd for C<sub>18</sub>H<sub>19</sub>NO<sub>2</sub>S (M + Na)<sup>+</sup>: 336.1034; found: 336.1035.

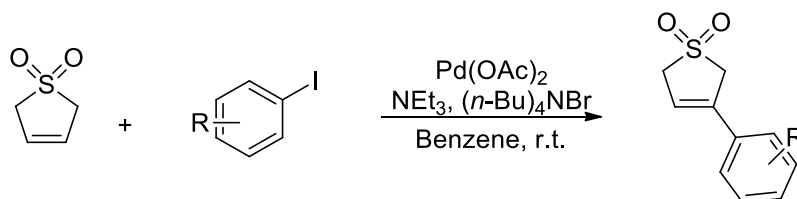

**Procedure 2:** A mixture of 2.04 g (10.0 mmol) iodobenzene, 1.24 g (10.5 mmol) sulfolene, 1.26 g (12.5 mmol) triethylamine, 3.22 g (10.0 mmol) tetrabutylammonium bromide, 112 mg (5%) Pd(OAc)<sub>2</sub>, and 5 ml of benzene was stirred in a foil-covered, stoppered flask for 24 h. The solvent was removed in vacuum, quenched with water (20 mL), and extracted with DCM (30 mL×3). The organic layers were combined, washed with brine (10 mL), dried by anhydrous Na<sub>2</sub>SO<sub>4</sub> and filtered. The filtrate was concentrated under reduced pressure. The residue was purified with 200 – 300 mesh silica gel column chromatography to give the corresponding product<sup>[2]</sup>.

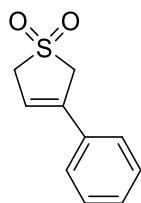

**3a**

**3-Phenyl-2,5-dihydrothiophene 1,1-dioxide (3a).** White solid, 91% yield, mp = 122.0 – 124.0 °C. <sup>1</sup>H NMR (400 MHz, CDCl<sub>3</sub>) δ 7.43 – 7.35 (m, 5H), 6.36 – 6.34 (m, 1H), 4.16 – 4.15 (m, 2H), 4.05 – 4.03 (m, 2H). <sup>13</sup>C NMR (100 MHz, CDCl<sub>3</sub>) δ 136.3, 133.9, 129.3, 129.0, 125.5, 117.1, 57.7, 56.7. HRMS (FT-MS) calcd for C<sub>10</sub>H<sub>10</sub>SO<sub>2</sub> (M + Na)<sup>+</sup>: 217.0299; found: 217.0294.

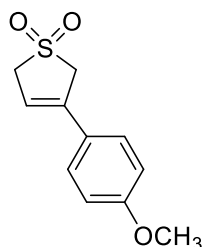

**3b**

**3-(4-Methoxyphenyl)-2,5-dihydrothiophene 1,1-dioxide (3b).** White solid, 83% yield, mp = 91.6 – 92.8 °C. <sup>1</sup>H NMR (400 MHz, CDCl<sub>3</sub>) δ 7.31 – 7.28 (m, 2H), 6.93 – 6.89 (m, 2H), 6.22 – 6.20 (m, 1H), 4.11 (d, *J* = 1.6 Hz, 2H), 4.02 – 4.01 (m, 2H), 3.83 (s, 3H). <sup>13</sup>C



NMR (100 MHz, CDCl<sub>3</sub>)  $\delta$  160.3, 135.6, 126.8, 126.6, 114.9, 114.3, 57.7, 56.7, 55.4. HRMS (FT-MS) calcd for C<sub>11</sub>H<sub>12</sub>SO<sub>3</sub> (M + Na)<sup>+</sup>: 247.0405; found: 247.0407.

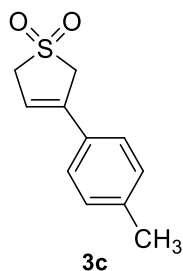

**3-(p-Tolyl)-2,5-dihydrothiophene 1,1-dioxide (3c).** White solid, 90% yield, mp = 146.6 – 148.3 °C. <sup>1</sup>H NMR (400 MHz, CDCl<sub>3</sub>)  $\delta$  7.26 – 7.19 (m, 4H), 6.30 – 6.28 (m, 1H), 4.12 (d, *J* = 1.6 Hz, 2H), 4.02 – 4.01 (m, 2H), 2.37 (s, 3H). <sup>13</sup>C NMR (100 MHz, CDCl<sub>3</sub>)  $\delta$  135.2, 132.4, 129.2, 126.7, 117.8, 57.7, 56.5. HRMS (FT-MS) calcd for C<sub>11</sub>H<sub>12</sub>SO<sub>2</sub> (M + Na)<sup>+</sup>: 231.0456; found: 231.0460.

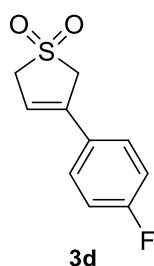

**3-(4-Fluorophenyl)-2,5-dihydrothiophene 1,1-dioxide (3d).** White solid, 81% yield, mp = 103.1 – 105.0 °C. <sup>1</sup>H NMR (400 MHz, CDCl<sub>3</sub>)  $\delta$  7.37 – 7.32 (m, 2H), 7.12 – 7.06 (m, 2H), 6.30 – 6.28 (m, 1H), 4.12 (dd, *J* = 3.2, 1.2 Hz, 2H), 4.03 (d, *J* = 1.2 Hz, 2H). <sup>13</sup>C NMR (100 MHz, CDCl<sub>3</sub>)  $\delta$  163.1 (d, *J*<sub>C-F</sub> = 248.5 Hz), 135.2, 130.2 (d, *J*<sub>C-F</sub> = 3.4 Hz), 127.3 (d, *J*<sub>C-F</sub> = 8.3 Hz), 117.1 (d, *J*<sub>C-F</sub> = 1.8 Hz), 116.1 (d, *J*<sub>C-F</sub> = 21.7 Hz), 57.7, 56.6. HRMS (FT-MS) calcd for C<sub>10</sub>H<sub>9</sub>FSO<sub>2</sub> (M + Na)<sup>+</sup>: 235.0205; found: 235.0200.

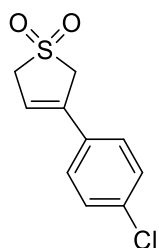

**3-(4-Chlorophenyl)-2,5-dihydrothiophene 1,1-dioxide (3e).** White solid, 88% yield, mp = 148.0 – 149.9 °C. <sup>1</sup>H NMR (400 MHz, CDCl<sub>3</sub>)  $\delta$  7.39 – 7.36 (m, 2H), 7.31 – 7.28 (m, 2H), 6.36 – 6.34 (m, 1H), 4.12 – 4.11 (m, 2H), 4.04 – 4.03 (m, 2H). <sup>13</sup>C NMR (100 MHz, CDCl<sub>3</sub>)  $\delta$  135.2, 132.4, 129.2, 126.7, 117.8, 57.7, 56.5. HRMS (FT-MS) calcd for C<sub>10</sub>H<sub>9</sub>ClSO<sub>2</sub> (M + Na)<sup>+</sup>: 250.9909; found: 250.9916.

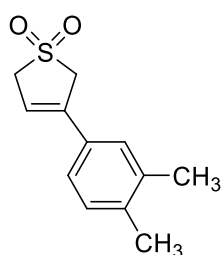

**3-(3,4-Dimethylphenyl)-2,5-dihydrothiophene 1,1-dioxide (3f).** White solid,



for  $C_{17}H_{19}NO_2S$  ( $M + Na$ )<sup>+</sup>: 324.1034; found: 324.1035. HPLC [DAICEL CHIRALPAK OD-H, hexane/*i*PrOH = 97/3, 210 nm, 1.0 mL/min.  $t_{R1}$  = 40.4 min (minor),  $t_{R2}$  = 42.4 min (major)]; *ee* = 98% [ $\alpha$ ]<sub>D</sub><sup>20</sup> = -5.00 (*c* = 0.90, CHCl<sub>3</sub>).

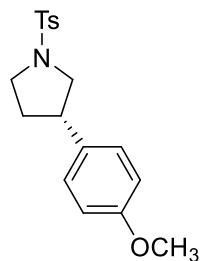

**2b** (S)-3-(4-Methoxyphenyl)-1-tosylpyrrolidine (2b). White solid, 97% yield, mp

= 82.8 – 84.0 °C. <sup>1</sup>H NMR (400 MHz, CDCl<sub>3</sub>) δ 7.75 (d, *J* = 8.0 Hz, 2H), 7.34 (d, *J* = 8.0 Hz, 2H), 7.03 – 7.01 (m, 2H), 6.82 – 6.79 (m, 2H), 3.77 (s, 3H), 3.71 – 3.66 (m, 1H), 3.54 – 3.49 (m, 1H), 3.37 – 3.31 (m, 1H), 3.22 – 3.11 (m, 2H), 2.45 (s, 3H), 2.20 – 2.13 (m, 1H), 1.87 – 1.77 (m, 1H). <sup>13</sup>C NMR (100 MHz, CDCl<sub>3</sub>) δ 158.5, 143.5, 133.9, 132.6, 129.7, 127.9, 127.6, 114.0, 55.3, 54.3, 47.8, 43.1, 33.1, 21.6. HRMS (FT-MS) calcd for  $C_{18}H_{21}NO_3S$  ( $M + Na$ )<sup>+</sup>: 354.1140; found: 354.1141. HPLC [DAICEL CHIRALPAK OD-H, hexane/*i*PrOH = 97/3, 210 nm, 1.0 mL/min.  $t_{R1}$  = 68.8 min (minor),  $t_{R2}$  = 71.2 min (major)]; *ee* = 98%, [ $\alpha$ ]<sub>D</sub><sup>20</sup> = -6.59 (*c* = 0.99, CHCl<sub>3</sub>).

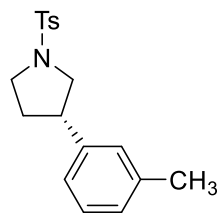

**2c** (S)-3-(*m*-Tolyl)-1-tosylpyrrolidine (2c). White solid, 97% yield, mp = 48.8 –

49.9 °C. <sup>1</sup>H NMR (400 MHz, CDCl<sub>3</sub>) δ 7.75 (d, *J* = 8.4 Hz, 2H), 7.34 (d, *J* = 8.4 Hz, 2H), 7.17 – 7.10 (m, 1H), 7.02 (d, *J* = 7.6 Hz, 1H), 6.89 (d, *J* = 2.0 Hz, 2H), 3.75 – 3.68 (m, 1H), 3.55 – 3.50 (m, 1H), 3.38 – 3.32 (m, 1H), 3.23 – 3.14 (m, 2H), 2.45 (s, 3H), 2.29 (s, 3H), 2.22 – 2.15 (m, 1H), 1.90 – 1.80 (m, 1H). <sup>13</sup>C NMR (100 MHz, CDCl<sub>3</sub>) δ 143.5, 140.6, 138.3, 134.0, 129.7, 128.5, 127.7, 127.6, 124.0, 54.1, 47.9, 43.8, 32.9, 21.6, 21.4. HRMS (FT-MS) calcd for  $C_{18}H_{21}NO_2S$  ( $M + Na$ )<sup>+</sup>: 338.1191; found: 338.1191. HPLC [DAICEL CHIRALPAK OD-H, hexane/*i*PrOH = 97/3, 210 nm, 1.0 mL/min.  $t_{R1}$  = 31.0 min (minor),  $t_{R2}$  = 33.3 min (major)]; *ee* = 98% , [ $\alpha$ ]<sub>D</sub><sup>20</sup> = -8.88 (*c* = 0.95, CHCl<sub>3</sub>).

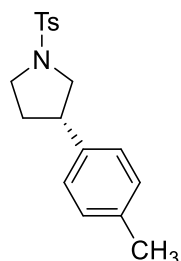

**2d** (S)-3-(*p*-Tolyl)-1-tosylpyrrolidine (2d). Colorless viscous liquid, 98% yield. <sup>1</sup>H

NMR (400 MHz, CDCl<sub>3</sub>) δ 7.75 – 7.73 (m, 2H), 7.34 (d, *J* = 8.0 Hz, 2H), 7.08 (d, *J* = 7.6 Hz, 2H), 6.98 (d, *J* = 8.0 Hz, 2H), 3.75 – 3.65 (m, 1H), 3.54 – 3.49 (m, 1H), 3.38 – 3.31 (m, 1H), 3.23 – 3.13 (m, 2H), 2.45 (s, 3H), 2.30 (s, 3H), 2.24 – 2.14 (m, 1H), 1.88 – 1.78 (m, 1H). <sup>13</sup>C NMR (100

MHz, CDCl<sub>3</sub>)  $\delta$  143.5, 137.6, 136.6, 133.9, 129.7, 129.3, 127.6, 126.8, 54.2, 47.9, 43.5, 33.0, 21.6, 21.0. HRMS (FT-MS) calcd for C<sub>18</sub>H<sub>21</sub>NO<sub>2</sub>S (M + Na)<sup>+</sup>: 338.1191; found: 338.1193. HPLC [DAICEL CHIRALPAK OD-H, hexane/*i*PrOH = 95/5, 210 nm, 1.0 mL/min.  $t_{R1}$  = 20.6 min (minor),  $t_{R2}$  = 23.0 min (major)]; *ee* = 97%,  $[\alpha]^{20}_D$  = -5.66 (c = 0.95, CHCl<sub>3</sub>).

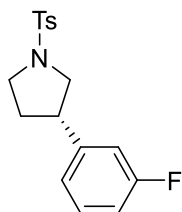

**2e** (S)-3-(3-Fluorophenyl)-1-tosylpyrrolidine (2e). White solid, 97% yield, mp = 53.5 – 54.7 °C. <sup>1</sup>H NMR (400 MHz, CDCl<sub>3</sub>)  $\delta$  7.76 – 7.74 (m, 2H), 7.35 (d, *J* = 8.0 Hz, 2H), 7.26 – 7.20 (m, 1H), 6.93 – 6.88 (m, 2H), 6.77 – 6.74 (m, 1H), 3.74 – 3.69 (m, 1H), 3.54 – 3.49 (m, 1H), 3.37 – 3.33 (m, 1H), 3.28 – 3.16 (m, 2H), 2.46 (s, 3H), 2.25 – 2.17 (m, 1H), 1.89 – 1.79 (m, 1H). <sup>13</sup>C NMR (100 MHz, CDCl<sub>3</sub>)  $\delta$  162.9 (d, *J*<sub>C-F</sub> = 244.7 Hz), 143.6, 143.4 (d, *J*<sub>C-F</sub> = 7.1 Hz), 133.8, 130.2 (d, *J*<sub>C-F</sub> = 7.3 Hz), 129.8, 127.5, 122.7 (d, *J*<sub>C-F</sub> = 2.8 Hz), 113.9 (d, *J*<sub>C-F</sub> = 21.2 Hz), 53.9, 47.7, 43.5, 43.5, 32.8, 21.6. HRMS (FT-MS) calcd for C<sub>17</sub>H<sub>18</sub>FNO<sub>2</sub>S (M + Na)<sup>+</sup>: 342.0940; found: 342.0940. HPLC [DAICEL CHIRALPAK OD-H, hexane/*i*PrOH = 95/5, 210 nm, 1.0 mL/min.  $t_{R1}$  = 26.7 min (minor),  $t_{R2}$  = 28.3 min (major)]; *ee* = 96%  $[\alpha]^{20}_D$  = 2.92 (c = 0.96, CHCl<sub>3</sub>).

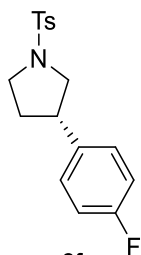

**2f** (S)-3-(4-Fluorophenyl)-1-tosylpyrrolidine (2f). White solid, 97% yield, mp = 72.0 – 73.6 °C. <sup>1</sup>H NMR (400 MHz, CDCl<sub>3</sub>)  $\delta$  7.74 (d, *J* = 8.4 Hz, 2H), 7.34 (d, *J* = 8.0 Hz, 2H), 7.07 – 7.04 (m, 2H), 6.95 (t, *J* = 8.8 Hz, 2H), 3.71 – 3.67 (m, 1H), 3.54 – 3.49 (m, 1H), 3.37 – 3.30 (m, 1H), 3.25 – 3.13 (m, 2H), 2.45 (s, 3H), 2.21 – 2.15 (m, 1H), 1.87 – 1.78 (m, 1H). <sup>13</sup>C NMR (100 MHz, CDCl<sub>3</sub>)  $\delta$  161.7 (d, *J*<sub>C-F</sub> = 243.9 Hz), 143.6, 136.4 (d, *J*<sub>C-F</sub> = 3.2 Hz), 133.9, 129.8, 128.4 (d, *J*<sub>C-F</sub> = 7.9 Hz), 127.6, 115.5 (d, *J*<sub>C-F</sub> = 21.2 Hz), 54.2, 47.7, 43.1, 33.1, 21.6. HRMS (FT-MS) calcd for C<sub>17</sub>H<sub>18</sub>FNO<sub>2</sub>S (M + Na)<sup>+</sup>: 342.0940; found: 342.0942. HPLC [DAICEL CHIRALPAK OD-H, hexane/*i*PrOH = 97/3, 210 nm, 1.0 mL/min.  $t_{R1}$  = 49.8 min (minor),  $t_{R2}$  = 51.7 min (major)]; *ee* = 97%,  $[\alpha]^{20}_D$  = -8.97 (c = 0.96, CHCl<sub>3</sub>).

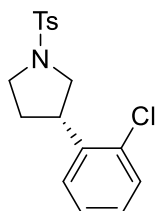

**2g** (S)-3-(2-Chlorophenyl)-1-tosylpyrrolidine (2g). White solid, 95% yield, mp = 60.5 – 62.0 °C. <sup>1</sup>H NMR (400 MHz, CDCl<sub>3</sub>)  $\delta$  7.76 (d, *J* = 8.0 Hz, 2H), 7.36 – 7.32 (m, 3H), 7.18 – 7.13 (m, 3H), 3.71 – 3.60 (m, 2H), 3.55 – 3.49 (m, 1H), 3.36 – 3.26 (m, 2H), 2.46 (s, 3H), 2.20 – 2.13 (m, 1H), 1.95 – 1.86 (m, 1H). <sup>13</sup>C NMR (100 MHz, CDCl<sub>3</sub>)  $\delta$  143.6, 138.3, 134.0, 133.8,

129.8, 129.7, 128.1, 127.6, 127.2, 127.0, 52.9, 47.4, 40.3, 31.5, 21.6. HRMS (FT-MS) calcd for  $C_{17}H_{18}ClNO_2S$  ( $M + Na$ )<sup>+</sup>: 358.0644; found: 358.0645. HPLC [DAICEL CHIRALPAK OD-H, hexane/*i*PrOH = 97/3, 210 nm, 1.0 mL/min.  $t_{R1}$  = 33.5 min (minor),  $t_{R2}$  = 38.9 min (major)]; *ee* = 93%,  $[\alpha]_D^{20}$  = -20.81 (*c* = 1.01,  $CHCl_3$ ).

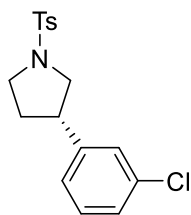

**2h**

**(S)-3-(3-Chlorophenyl)-1-tosylpyrrolidine (2h)**. Colorless viscous liquid, 97%

yield. <sup>1</sup>H NMR (400 MHz,  $CDCl_3$ )  $\delta$  7.75 (d, *J* = 8.4 Hz, 2H), 7.35 (d, *J* = 8.0 Hz, 2H), 7.20 – 7.19 (m, 2H), 7.04 (s, 1H), 7.01 – 6.98 (m, 1H), 3.75 – 3.67 (m, 1H), 3.55 – 3.49 (m, 1H), 3.39 – 3.32 (m, 1H), 3.25 – 3.15 (m, 2H), 2.46 (s, 3H), 2.24 – 2.17 (m, 1H), 1.89 – 1.79 (m, 1H). <sup>13</sup>C NMR (100 MHz,  $CDCl_3$ )  $\delta$  143.7, 142.9, 134.5, 133.8, 129.9, 129.8, 127.5, 127.2, 127.1, 125.2, 53.9, 47.7, 43.5, 32.8, 21.6. HRMS (FT-MS) calcd for  $C_{17}H_{18}ClNO_2S$  ( $M + Na$ )<sup>+</sup>: 358.0644; found: 358.0646. HPLC [DAICEL CHIRALPAK OJ-H, hexane/*i*PrOH = 97/3, 210 nm, 1.0 mL/min.  $t_{R1}$  = 42.8 min (major),  $t_{R2}$  = 49.7 min (minor)]; *ee* = 96%,  $[\alpha]_D^{20}$  = -11.99 (*c* = 1.01,  $CHCl_3$ ).

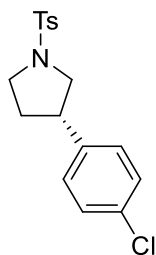

**2i**

**(S)-3-(4-Chlorophenyl)-1-tosylpyrrolidine (2i)**. White solid, 96% yield, mp = 60.6

– 62.1 °C. <sup>1</sup>H NMR (400 MHz,  $CDCl_3$ )  $\delta$  7.74 (d, *J* = 8.0 Hz, 2H), 7.34 (d, *J* = 8.0 Hz, 2H), 7.25 – 7.21 (m, 2H), 7.04 – 7.01 (m, 2H), 3.72 – 3.66 (m, 1H), 3.54 – 3.49 (m, 1H), 3.37 – 3.31 (m, 1H), 3.25 – 3.14 (m, 2H), 2.46 (s, 3H), 2.23 – 2.16 (m, 1H), 1.88 – 1.78 (m, 1H). <sup>13</sup>C NMR (100 MHz,  $CDCl_3$ )  $\delta$  143.6, 139.3, 133.8, 132.7, 129.7, 128.8, 128.3, 127.6, 54.0, 47.7, 43.2, 32.9, 21.6. HRMS (FT-MS) calcd for  $C_{17}H_{18}ClNO_2S$  ( $M + Na$ )<sup>+</sup>: 358.0644; found: 358.0642. HPLC [DAICEL CHIRALPAK OD-H, hexane/*i*PrOH = 97/3, 210 nm, 1.0 mL/min.  $t_{R1}$  = 45.6 min (minor),  $t_{R2}$  = 47.2 min (major)]; *ee* = 98%,  $[\alpha]_D^{20}$  = -9.57 (*c* = 1.01,  $CHCl_3$ ).

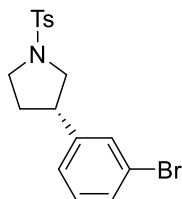

**2j**

**(S)-3-(3-Bromophenyl)-1-tosylpyrrolidine (2j)**. White solid, 97% yield, mp =

71.5 – 72.8 °C. <sup>1</sup>H NMR (400 MHz,  $CDCl_3$ )  $\delta$  7.74 (d, *J* = 8.4 Hz, 2H), 7.35 (d, *J* = 8.0 Hz, 3H), 7.20 (s, 1H), 7.14 (t, *J* = 7.8 Hz, 1H), 7.03 (d, *J* = 7.6 Hz, 1H), 3.73 – 3.67 (m, 1H), 3.55 – 3.49 (m, 1H), 3.38 – 3.31 (m, 1H), 3.24 – 3.14 (m, 2H), 2.45 (s, 3H), 2.23 – 2.16 (m, 1H), 1.88 – 1.78 (m, 1H). <sup>13</sup>C NMR (100 MHz,  $CDCl_3$ )  $\delta$  143.7, 143.2, 133.8, 130.2, 130.1, 130.1, 129.8, 127.5, 125.67, 122.7, 53.9, 47.7, 43.5, 32.8, 21.6. HRMS (FT-MS) calcd for  $C_{17}H_{18}BrNO_2S$  ( $M + Na$ )<sup>+</sup>: 402.0139;

found: 402.0147. HPLC [DAICEL CHIRALPAK AD-H, hexane/*i*PrOH = 98/2, 210 nm, 1.0 mL/min.  $t_{R1}$  = 56.0 min (major),  $t_{R2}$  = 58.7 min (minor)]; *ee* = 97%,  $[\alpha]^{20}_D$  = -8.12 (*c* = 1.14, CHCl<sub>3</sub>).

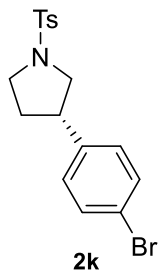

**2k** (S)-3-(4-Bromophenyl)-1-tosylpyrrolidine (**2k**). White solid, 98% yield, mp = 60.1 – 61.5 °C. <sup>1</sup>H NMR (400 MHz, CDCl<sub>3</sub>) δ 7.74 (d, *J* = 8.4 Hz, 2H), 7.40 – 7.33 (m, 4H), 6.97 (d, *J* = 8.4 Hz, 2H), 3.72 – 3.65 (m, 1H), 3.53 – 3.49 (m, 1H), 3.37 – 3.31 (m, 1H), 3.23 – 3.14 (m, 2H), 2.46 (s, 3H), 2.23 – 2.16 (m, 1H), 1.87 – 1.76 (m, 1H). <sup>13</sup>C NMR (100 MHz, CDCl<sub>3</sub>) δ 143.6, 139.8, 133.8, 131.7, 129.8, 128.7, 127.6, 120.7, 53.9, 47.7, 43.3, 32.8, 21.6. HRMS (FT-MS) calcd for C<sub>17</sub>H<sub>18</sub>BrNO<sub>2</sub>S (M + Na)<sup>+</sup>: 402.0139; found: 402.0144. HPLC [DAICEL CHIRALPAK OD-H, hexane/*i*PrOH = 97/3, 210 nm, 1.0 mL/min.  $t_{R1}$  = 38.8 min (minor),  $t_{R2}$  = 40.5 min (major)]; *ee* = 98%,  $[\alpha]^{20}_D$  = -10.54 (*c* = 1.14, CHCl<sub>3</sub>).

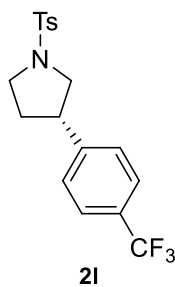

**2l** (S)-1-Tosyl-3-(4-(trifluoromethyl)phenyl)pyrrolidine (**2l**). White solid, 95% yield, mp = 91.7 – 93.4 °C. <sup>1</sup>H NMR (400 MHz, CDCl<sub>3</sub>) δ 7.75 (d, *J* = 8.0 Hz, 2H), 7.52 (d, *J* = 8.4 Hz, 2H), 7.35 (d, *J* = 8.0 Hz, 2H), 7.22 (d, *J* = 8.0 Hz, 2H), 3.74 – 3.70 (m, 1H), 3.57 – 3.51 (m, 1H), 3.40 – 3.20 (m, 3H), 2.46 (s, 3H), 2.28 – 2.20 (m, 1H), 1.93-1.83 (m, 1H). <sup>13</sup>C NMR (100 MHz, CDCl<sub>3</sub>) δ 145.0 (q, *J* = 1.1 Hz), 143.7, 133.7, 129.8, 129.0 (q, *J* = 32.4 Hz), 127.6, 127.3, 125.6 (q, *J* = 3.6 Hz), 124.0 (q, *J* = 270.3 Hz), 53.8, 47.7, 43.6, 32.8, 21.6. HRMS (FT-MS) calcd for C<sub>18</sub>H<sub>18</sub>F<sub>3</sub>NO<sub>2</sub>S (M + Na)<sup>+</sup>: 392.0908; found: 392.0906. HPLC [DAICEL CHIRALPAK OD-H, hexane/*i*PrOH = 95/5, 210 nm, 1.0 mL/min.  $t_{R1}$  = 27.2 min (minor),  $t_{R2}$  = 29.0 min (major)]; *ee* = 97%,  $[\alpha]^{20}_D$  = -12.11 (*c* = 1.11, CHCl<sub>3</sub>).

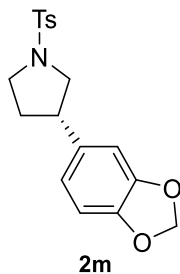

**2m** (S)-3-(Benzo[d][1,3]dioxol-5-yl)-1-tosylpyrrolidine (**2m**). White solid, 98% yield, mp = 117.0 – 119.0 °C. <sup>1</sup>H NMR (400 MHz, CDCl<sub>3</sub>) δ 7.75 – 7.73 (m, 2H), 7.34 (d, *J* = 8.0 Hz, 2H), 6.70 – 6.68 (m, 1H), 6.56 – 6.54 (m, 2H), 5.92 (s, 2H), 3.71 – 3.64 (m, 1H), 3.53 – 3.48 (m, 1H), 3.36 – 3.30 (m, 1H), 3.19 – 3.09 (m, 2H), 2.45 (s, 3H), 2.17 – 2.12 (m, 1H), 1.84 – 1.74 (m, 1H). <sup>13</sup>C NMR (100 MHz, CDCl<sub>3</sub>) δ 147.9, 146.4, 143.5, 134.4, 133.8, 129.7, 127.6, 120.0,

108.3, 107.2, 101.0, 54.3, 47.8, 43.6, 33.1, 21.6. HRMS (FT-MS) calcd for  $C_{18}H_{19}NO_4S$  ( $M + Na$ )<sup>+</sup>: 368.0932; found: 368.0933. HPLC [DAICEL CHIRALPAK OD-H, hexane/*i*PrOH = 95/5, 210 nm, 1.0 mL/min.  $t_{R1}$  = 41.2 min (minor),  $t_{R2}$  = 45.1 min (major)]; *ee* = 98%,  $[\alpha]^{20}_D$  = -8.17 (*c* = 1.04,  $CHCl_3$ ).

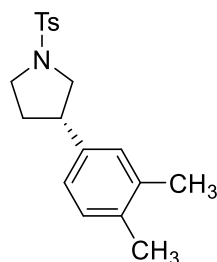

**2n**

**(S)-3-(3,4-Dimethylphenyl)-1-tosylpyrrolidine (2n).** White soild, 96% yield,

*mp* = 65.4 – 67.4 °C. <sup>1</sup>H NMR (400 MHz,  $CDCl_3$ )  $\delta$  7.75 (d, *J* = 8.4 Hz, 2H), 7.34 (d, *J* = 8.0 Hz, 2H), 7.03 (d, *J* = 7.6 Hz, 1H), 6.85 – 6.81 (m, 2H), 3.74 – 3.67 (m, 1H), 3.54 – 3.49 (m, 1H), 3.38 – 3.31 (m, 1H), 3.21 – 3.12 (m, 2H), 2.45 (s, 3H), 2.21(s, 3H), 2.20 (s, 3H), 2.18 – 2.14 (m, 1H), 1.88 – 1.78 (m, 1H). <sup>13</sup>C NMR (100 MHz,  $CDCl_3$ )  $\delta$  143.4, 138.1, 136.8, 135.3, 134.0, 129.8, 129.7, 128.3, 127.6, 124.2, 54.2, 47.9, 43.5, 33.0, 21.6, 19.8, 19.3. HRMS (FT-MS) calcd for  $C_{19}H_{23}NO_2S$  ( $M + Na$ )<sup>+</sup>: 352.1347; found: 352.1348. HPLC [DAICEL CHIRALPAK OD-H, hexane/*i*PrOH = 95/5, 210 nm, 1.0 mL/min.  $t_{R1}$  = 21.5 min (minor),  $t_{R2}$  = 23.8 min (major)]; *ee* = 97%,  $[\alpha]^{20}_D$  = -5.94 (*c* = 0.99,  $CHCl_3$ ).

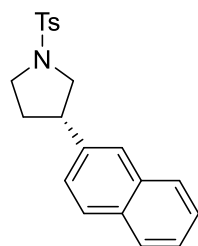

**2o**

**(S)-3-(Naphthalen-2-yl)-1-tosylpyrrolidine (2o).** White soild, 95% yield, *mp*

= 102.3 – 103.5 °C. <sup>1</sup>H NMR (400 MHz,  $CDCl_3$ )  $\delta$  7.80 – 7.75 (m, 4H), 7.72 – 7.70 (m, 1H), 7.50 – 7.42 (m, 3H), 7.34 (d, *J* = 8.2 Hz, 2H), 7.24 – 7.21 (m, 1H), 3.82 – 3.78 (m, 1H), 3.60 – 3.55 (m, 1H), 3.44 – 3.37 (m, 2H), 3.35 – 3.31 (m, 1H), 2.45 (s, 3H), 2.32 – 2.17 (m, 1H), 2.03 – 1.93 (m, 1H). <sup>13</sup>C NMR (100 MHz,  $CDCl_3$ )  $\delta$  143.5, 138.1, 133.9, 133.3, 132.4, 129.8, 128.4, 127.6, 126.3, 125.8, 125.3, 54.0, 47.9, 43.9, 32.9, 21.6. HRMS (FT-MS) calcd for  $C_{21}H_{21}NO_2S$  ( $M + Na$ )<sup>+</sup>: 374.1191; found: 374.1190. HPLC [DAICEL CHIRALPAK OD-H, hexane/*i*PrOH = 95/5, 210 nm, 1.0 mL/min.  $t_{R1}$  = 47.1 min (minor),  $t_{R2}$  = 51.7 min (major)]; *ee* = 98%,  $[\alpha]^{20}_D$  = -13.27 (*c* = 1.05,  $CHCl_3$ ).

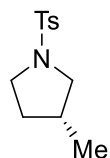

**2p**

**(R)-3-Methyl-1-tosylpyrrolidine (2p).** White soild, 97% yield, *mp* = 74.0 – 74.5 °C. <sup>1</sup>H NMR (400 MHz,  $CDCl_3$ )  $\delta$  7.72 – 7.70 (m, 2H), 7.32 (d, *J* = 8.0 Hz, 2H), 3.44 – 3.40 (m, 1H), 3.37 – 3.32 (m, 1H), 3.25 – 3.19 (m, 1H), 2.77 – 2.73 (m, 1H), 2.43 (s, 3H), 2.16 – 2.07 (m, 1H), 1.94 – 1.87 (m, 1H), 1.40 – 1.31 (m, 1H), 0.92 (d, *J* = 6.4 Hz, 3H). <sup>13</sup>C NMR (100 MHz,  $CDCl_3$ )  $\delta$

143.2, 134.0, 129.6, 127.5, 54.8, 47.6, 33.3, 33.2, 21.5, 17.6. HRMS (FT-MS) calcd for C<sub>12</sub>H<sub>17</sub>NO<sub>2</sub>S (M + Na)<sup>+</sup>: 262.0878; found: 262.0878. HPLC [DAICEL CHIRALPAK OZ-H, hexane/*i*PrOH = 97/3, 210 nm, 1.0 mL/min. t<sub>R1</sub> = 84.8 min (major), t<sub>R2</sub> = 93.7 min (minor)]; *ee* = 83%, [α]<sup>20</sup><sub>D</sub> = -7.98 (c = 0.72, CHCl<sub>3</sub>).

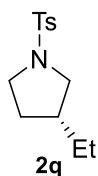

**2q** (**(R)-3-Ethyl-1-tosylpyrrolidine (2q)**). Colorless viscous liquid, 95% yield. <sup>1</sup>H NMR (400 MHz, CDCl<sub>3</sub>) δ 7.73 – 7.70 (m, 2H), 7.33 – 7.31 (m, 2H), 3.45 – 3.41 (m, 1H), 3.36 – 3.31 (m, 1H), 3.22 – 3.15 (m, 1H), 2.80 – 2.76 (m, 1H), 2.43 (s, 3H), 1.97 – 1.88 (m, 2H), 1.43 – 1.31 (m, 1H), 1.30 – 1.28 (m, 1H), 1.26 – 1.23 (m, 1H) 0.84 (t, *J* = 7.6 Hz, 3H). <sup>13</sup>C NMR (101 MHz, CDCl<sub>3</sub>) δ 143.3, 133.9, 129.6, 127.5, 53.1, 47.7, 40.6, 31.2, 26.0, 21.5, 12.5. HRMS (FT-MS) calcd for C<sub>13</sub>H<sub>19</sub>NO<sub>2</sub>S (M + Na)<sup>+</sup>: 276.1034; found: 276.1029. HPLC [DAICEL CHIRALPAK OZ-H, hexane/*i*PrOH = 98/2, 210 nm, 0.5 mL/min. t<sub>R1</sub> = 119.7 min (major), t<sub>R2</sub> = 127.4 min (minor)]; *ee* = 80%. [α]<sup>20</sup><sub>D</sub> = 9.65 (c = 0.36, CHCl<sub>3</sub>).

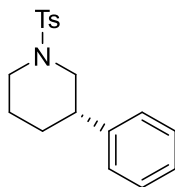

**2r** (**(S)-3-Phenyl-1-tosylpiperidine (2r)**). White solid, 95% yield, mp = 116.4 – 117.2 °C. <sup>1</sup>H NMR (400 MHz, CDCl<sub>3</sub>) δ 7.63 (d, *J* = 8.0 Hz, 2H), 7.30 (t, *J* = 7.2 Hz, 4H), 7.25 – 7.21 (m, 1H), 7.18 – 7.16 (m, 2H), 3.89 – 3.84 (m, 2H), 2.91 – 2.85 (m, 1H), 2.43 (s, 3H), 2.30 – 2.19 (m, 2H), 1.94 (d, *J* = 13.2 Hz, 1H), 1.87 – 1.72 (m, 2H), 1.47 – 1.37 (m, 1H). <sup>13</sup>C NMR (100 MHz, CDCl<sub>3</sub>) δ 143.4, 142.6, 133.2, 129.6, 128.6, 127.7, 127.2, 126.9, 52.70, 46.4, 42.1, 30.5, 25.1, 21.6. HRMS (FT-MS) calcd for C<sub>18</sub>H<sub>21</sub>NO<sub>2</sub>S (M + Na)<sup>+</sup>: 338.1191; found: 338.1191. HPLC [DAICEL CHIRALPAK OD-H, hexane/*i*PrOH = 97/3, 210 nm, 1.0 mL/min. t<sub>R1</sub> = 19.6 min (minor), t<sub>R2</sub> = 23.1 min (major)]; *ee* = 86%. [α]<sup>20</sup><sub>D</sub> = 96.17 (c = 0.95, CHCl<sub>3</sub>).

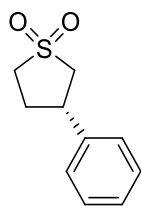

**4a** (**(S)-3-Phenyltetrahydrothiophene 1,1-dioxide (4a)**). White solid, 97% yield, mp = 103.6 – 105.3 °C. <sup>1</sup>H NMR (400 MHz, CDCl<sub>3</sub>) δ 7.40 – 7.36 (m, 2H), 7.33 – 7.29 (m, 1H), 7.28 – 7.26 (m, 2H), 3.68 – 3.60 (m, 1H), 3.51 – 3.46 (m, 1H), 3.41 – 3.35 (m, 1H), 3.26 – 3.01 (m, 2H), 2.60 – 2.52 (m, 1H), 2.38 – 2.17 (m, 1H). <sup>13</sup>C NMR (100 MHz, CDCl<sub>3</sub>) δ 139.7, 129.4, 128.1, 127.0, 57.8, 53.1, 42.0, 31.0. HRMS (FT-MS) calcd for C<sub>10</sub>H<sub>12</sub>SO<sub>2</sub> (M + Na)<sup>+</sup>: 219.0456; found: 219.0461. HPLC [DAICEL CHIRALPAK OJ-H, hexane/*i*PrOH = 60/40, 210 nm, 1.0 mL/min. t<sub>R1</sub> = 16.8 min (minor), t<sub>R2</sub> = 19.6 min (major)]; *ee* = 89%, [α]<sup>20</sup><sub>D</sub> = 11.59 (c = 0.59, CHCl<sub>3</sub>).



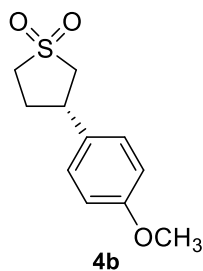

**4b**

**(S)-3-(4-Methoxyphenyl)tetrahydrothiophene 1,1-dioxide (4b).** White solid,

97% yield, mp = 97.0 – 98.3 °C. <sup>1</sup>H NMR (400 MHz, CDCl<sub>3</sub>) δ 7.19 – 7.17 (m, 2H), 6.92 – 6.89 (m, 2H), 3.81 (s, 3H), 3.63 – 3.54 (m, 1H), 3.48 – 3.43 (m, 1H), 3.40 – 3.34 (m, 1H), 3.21 – 3.04 (m, 2H), 2.56 – 2.48 (m, 1H), 2.34 – 2.17 (m, 1H). <sup>13</sup>C NMR (100 MHz, CDCl<sub>3</sub>) δ 159.3, 131.6, 128.0, 114.7, 58.0, 55.6, 53.2, 41.4, 31.2. HRMS (FT-MS) calcd for C<sub>11</sub>H<sub>14</sub>SO<sub>3</sub> (M + Na)<sup>+</sup>: 249.0561; found: 249.0557. HPLC [DAICEL CHIRALPAK AD-H, hexane/*i*PrOH = 90/10, 210 nm, 1.0 mL/min. t<sub>R1</sub> = 23.5 min (major), t<sub>R2</sub> = 25.9 min (minor)]; ee = 84%, [α]<sup>20</sup><sub>D</sub> = 16.84 (c = 0.68, CHCl<sub>3</sub>).

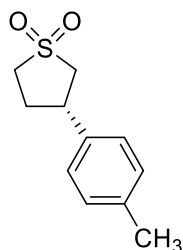

**4c**

**(S)-3-(*p*-Tolyl)tetrahydrothiophene 1,1-dioxide (4c).** White solid, 95% yield,

mp = 95.4 – 97.4 °C. <sup>1</sup>H NMR (400 MHz, CDCl<sub>3</sub>) δ 7.20 – 7.14 (m, 4H), 3.64 – 3.55 (m, 1H), 3.49 – 3.44 (m, 1H), 3.40 – 3.34 (m, 1H), 3.22 – 3.07 (m, 2H), 2.57 – 2.50 (m, 1H), 2.35 (s, 3H), 2.33 – 2.24 (m, 1H). <sup>13</sup>C NMR (100 MHz, CDCl<sub>3</sub>) δ 137.8, 136.7, 130.0, 126.8, 57.9, 53.1, 41.7, 31.1, 21.3. HRMS (FT-MS) calcd for C<sub>11</sub>H<sub>14</sub>SO<sub>2</sub> (M + Na)<sup>+</sup>: 233.0612; found: 233.0606. HPLC [DAICEL CHIRALPAK OJ-H, hexane/*i*PrOH = 60/40, 210 nm, 1.0 mL/min. t<sub>R1</sub> = 13.8 min (minor), t<sub>R2</sub> = 15.1 min (major)]; ee = 84%, [α]<sup>20</sup><sub>D</sub> = 18.13 (c = 0.63, CHCl<sub>3</sub>).

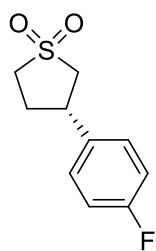

**4d**

**(S)-3-(4-Fluorophenyl)tetrahydrothiophene 1,1-dioxide (4d).** White solid, 95%

yield, mp = 88.5 – 89.9 °C. <sup>1</sup>H NMR (400 MHz, CDCl<sub>3</sub>) δ 7.25 – 7.22 (m, 2H), 7.06 (t, *J* = 8.4 Hz, 2H), 3.67 – 3.58 (m, 1H), 3.50 – 3.45 (m, 1H), 3.41 – 3.35 (m, 1H), 3.23 – 3.05 (m, 2H), 2.58 – 2.52 (m, 1H), 2.34 – 2.18 (m, 1H). <sup>13</sup>C NMR (100 MHz, CDCl<sub>3</sub>) δ 162.4 (d, *J*<sub>C-F</sub> = 245.5 Hz), 135.4 (d, *J*<sub>C-F</sub> = 2.9 Hz), 128.6 (d, *J*<sub>C-F</sub> = 8.0 Hz), 116.3 (d, *J*<sub>C-F</sub> = 21.4 Hz), 57.8, 53.0, 41.3, 31.1. HRMS (FT-MS) calcd for C<sub>10</sub>H<sub>11</sub>SFO<sub>2</sub> (M + Na)<sup>+</sup>: 237.0361; found: 237.0365. HPLC [DAICEL CHIRALPAK AD-H, hexane/*i*PrOH = 90/10, 210 nm, 1.0 mL/min. t<sub>R1</sub> = 20.5 min (major), t<sub>R2</sub> = 26.8 min (minor)]; ee = 71%, [α]<sup>20</sup><sub>D</sub> = 14.67 (c = 0.64, CHCl<sub>3</sub>).

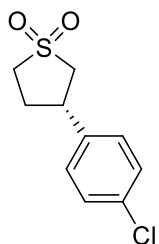

**4e**

**(S)-3-(4-Chlorophenyl)tetrahydrothiophene 1,1-dioxide (4e).** White solid, 94% yield, mp = 97.3 – 98.5 °C. <sup>1</sup>H NMR (400 MHz, CDCl<sub>3</sub>) δ 7.35 (d, *J* = 8.4 Hz, 2H), 7.20 (d, *J* = 8.4 Hz, 2H), 3.66 – 3.57 (m, 1H), 3.50 – 3.45 (m, 1H), 3.40 – 3.35 (m, 1H), 3.23 – 3.05 (m, 2H), 2.59 – 2.52 (m, 1H), 2.34 – 2.17 (m, 1H). <sup>13</sup>C NMR (100 MHz, CDCl<sub>3</sub>) δ 138.2, 133.9, 129.5, 128.3, 57.6, 52.9, 41.4, 30.9. HRMS (FT-MS) calcd for C<sub>10</sub>H<sub>11</sub>ClSO<sub>2</sub> (M + Na)<sup>+</sup>: 253.0066; found: 253.0072. HPLC [DAICEL CHIRALPAK AD-H, hexane/*i*PrOH = 90/10, 210 nm, 1.0 mL/min. t<sub>R1</sub> = 22.3 min (major), t<sub>R2</sub> = 26.2 min (minor)]; ee = 72%, [α]<sub>D</sub><sup>20</sup> = 11.87 (c = 0.69, CHCl<sub>3</sub>).

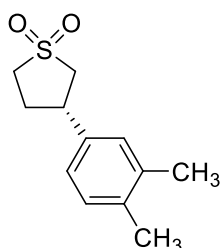

**4f**

**(S)-3-(3,4-Dimethylphenyl)tetrahydrothiophene 1,1-dioxide (4f).** White solid, 97% yield, mp = 117.5 – 118.8 °C. <sup>1</sup>H NMR (400 MHz, CDCl<sub>3</sub>) δ 7.13 (d, *J* = 7.6 Hz, 1H), 7.02 – 6.98 (m, 2H), 3.61 – 3.52 (m, 1H), 3.48 – 3.42 (m, 1H), 3.39 – 3.34 (m, 1H), 3.21 – 3.07 (m, 2H), 2.55 – 2.48 (m, 1H), 2.35 – 2.29 (m, 1H), 2.27 (s, 3H), 2.25 (s, 3H). <sup>13</sup>C NMR (100 MHz, CDCl<sub>3</sub>) δ 137.7, 137.1, 136.5, 130.5, 128.2, 124.2, 57.9, 53.2, 41.8, 31.1, 20.1, 19.6. HRMS (FT-MS) calcd for C<sub>12</sub>H<sub>16</sub>SO<sub>2</sub> (M + Na)<sup>+</sup>: 247.0769; found: 247.0765. HPLC [DAICEL CHIRALPAK OJ-H, hexane/*i*PrOH = 60/40, 210 nm, 1.0 mL/min. t<sub>R1</sub> = 12.8 min (minor), t<sub>R2</sub> = 16.6 min (major)]; ee = 86%, [α]<sub>D</sub><sup>20</sup> = 11.92 (c = 0.67, CHCl<sub>3</sub>).

#### 4. Transformation of Hydrogenation Product 2a.

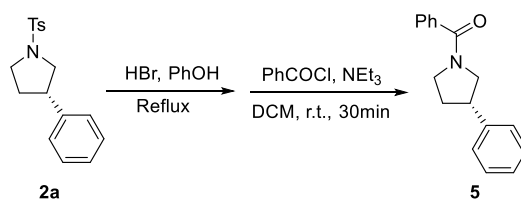

The reaction was conducted following literature procedure<sup>[4-5]</sup>. To a solution of (*S*)-3-Phenyl-1-tosylpyrrolidine **2a** (120.4 mg, 0.4 mmol, 98% ee) was added phenol (0.1 g) and 48% HBr (0.7 mL). The mixture was heated to 120 °C for 2 h. The acidic mixture was cooled to room temperature and was washed with diethyl ether. It was made alkaline with 30% sodium hydroxide solution and extracted with diethyl ether. The combined diethyl ether extracts of the alkaline solution were dried over Na<sub>2</sub>SO<sub>4</sub> and concentrated. The residue was redissolved in DCM (5 mL). Benzoyl chloride (92 μL, 0.8 mmol) and NEt<sub>3</sub> (166 μL, 1.2 mmol) were added, and the mixture was stirred for 30 min at room temperature. The solvent was removed under vacuum, and the residue was purified by silica gel preparative TLC with petroleum ether/EtOAc = 2/1 to afford **5** as white solid (84.4 mg, 0.34 mmol, 84% yield over 2 steps).

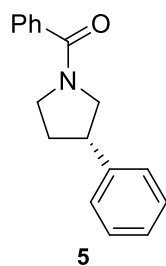

**5** (**(S)-Phenyl(3-phenylpyrrolidin-1-yl)methanone (5)**). White solid, 84% yield, mp = 81.5 – 83.0 °C. <sup>1</sup>H NMR (400 MHz, CDCl<sub>3</sub>) mixture of rotamers, δ 7.56 – 7.53 (m, 4H), 7.45 – 7.37 (m, 6H), 7.35 – 7.28 (m, 5H), 7.26 – 7.18 (m, 5H), 4.14 (dd, *J* = 12.0, 7.6 Hz, 1H), 3.95 – 3.90 (m, 1H), 3.83 – 3.75 (m, 2H), 3.73 – 3.65 (m, 1H), 3.63 – 3.53 (m, 2H), 3.51 – 3.44 (m, 2H), 3.40 – 3.32 (m, 1H), 2.42 – 2.36 (m, 1H), 2.32 – 2.25 (m, 1H), 2.21 – 2.09 (m, 1H), 2.06 – 1.96 (m, 1H). <sup>13</sup>C NMR (101 MHz, CDCl<sub>3</sub>) δ 169.9, 169.7, 141.0, 140.3, 136.8, 136.8, 132.9, 130.0, 128.7, 128.3, 127.2, 127.1, 127.0, 126.9, 56.1, 52.3, 49.4, 46.3, 44.7, 42.8, 33.9, 31.6. HRMS (FT-MS) calcd for C<sub>17</sub>H<sub>17</sub>NO (M + Na)<sup>+</sup>: 247.1208; found: 247.1202. HPLC [DAICEL CHIRALPAK OD-H, hexane/*i*PrOH = 95/5, 210 nm, 1.0 mL/min. t<sub>R1</sub> = 29.8 min (major), t<sub>R2</sub> = 35.6 min (minor)]; ee = 98%, [α]<sub>D</sub><sup>20</sup> = 10.20 (c = 0.62, CHCl<sub>3</sub>).

## 5. NMR Spectra and HPLC Charts.

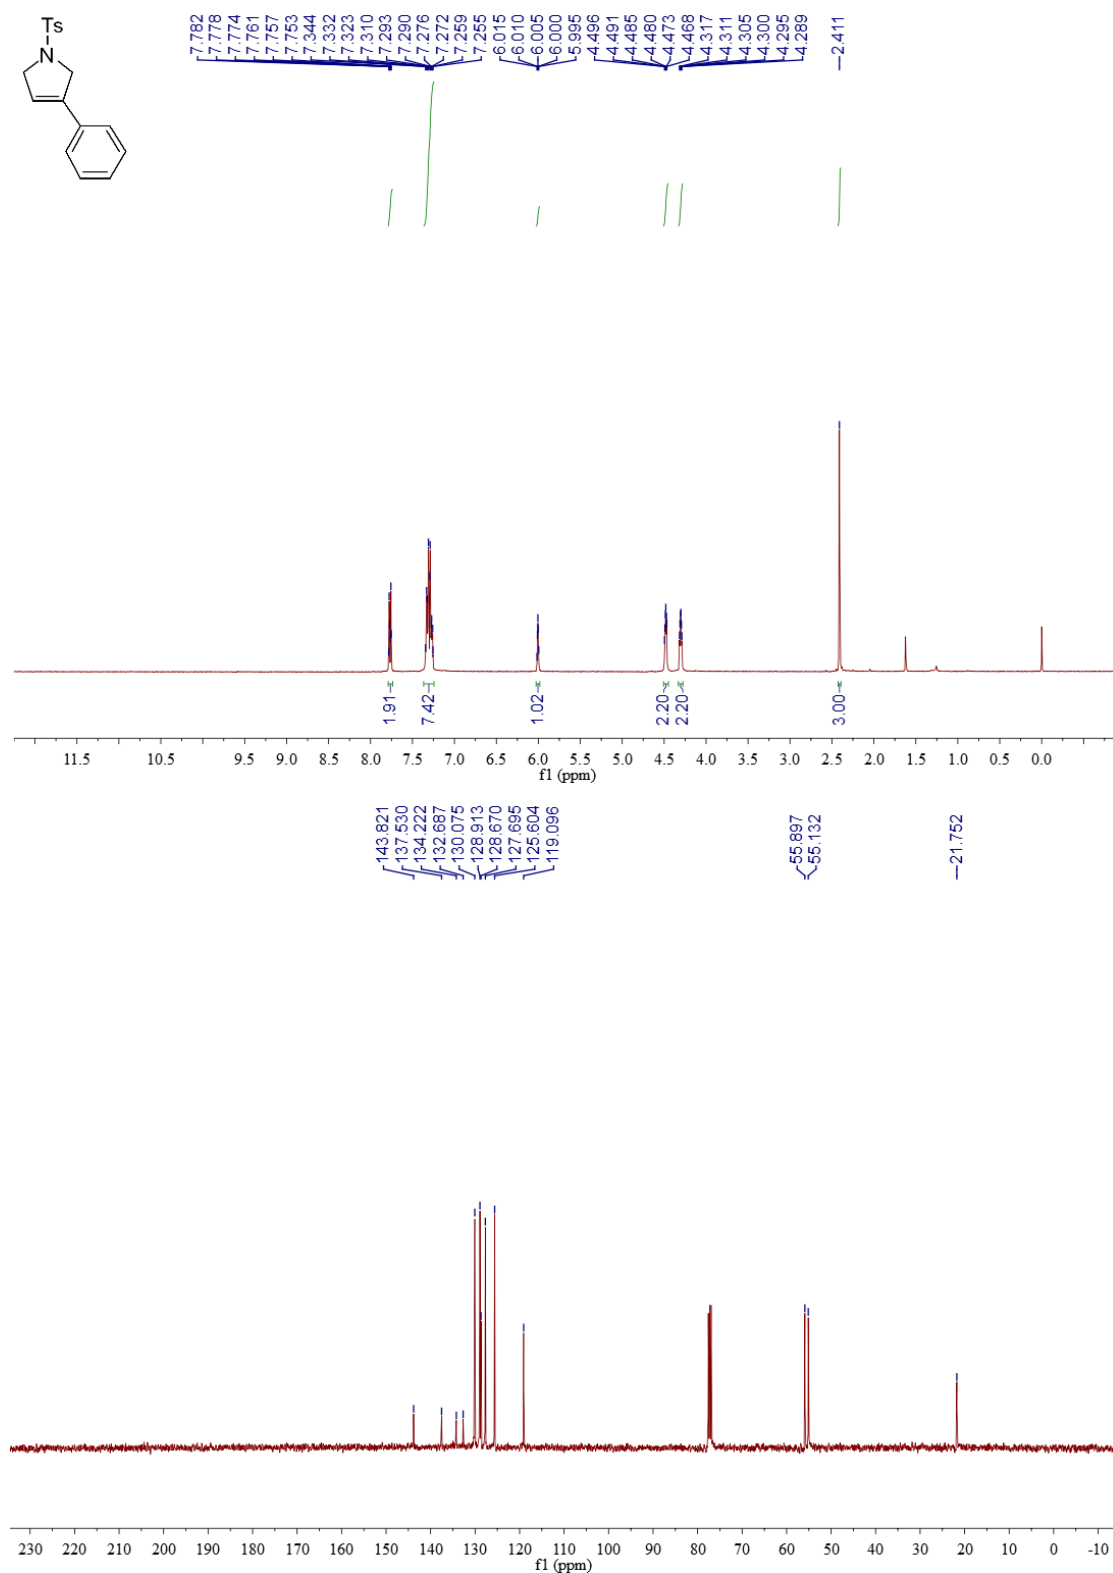

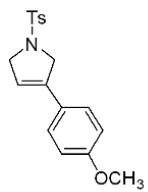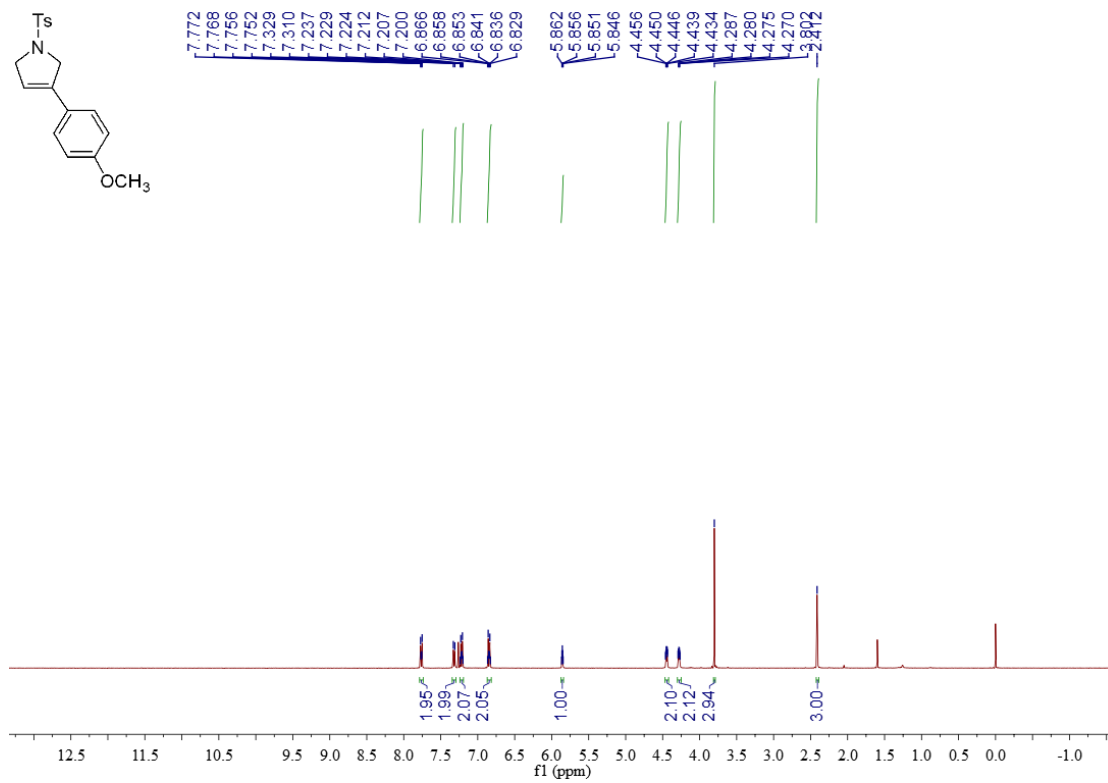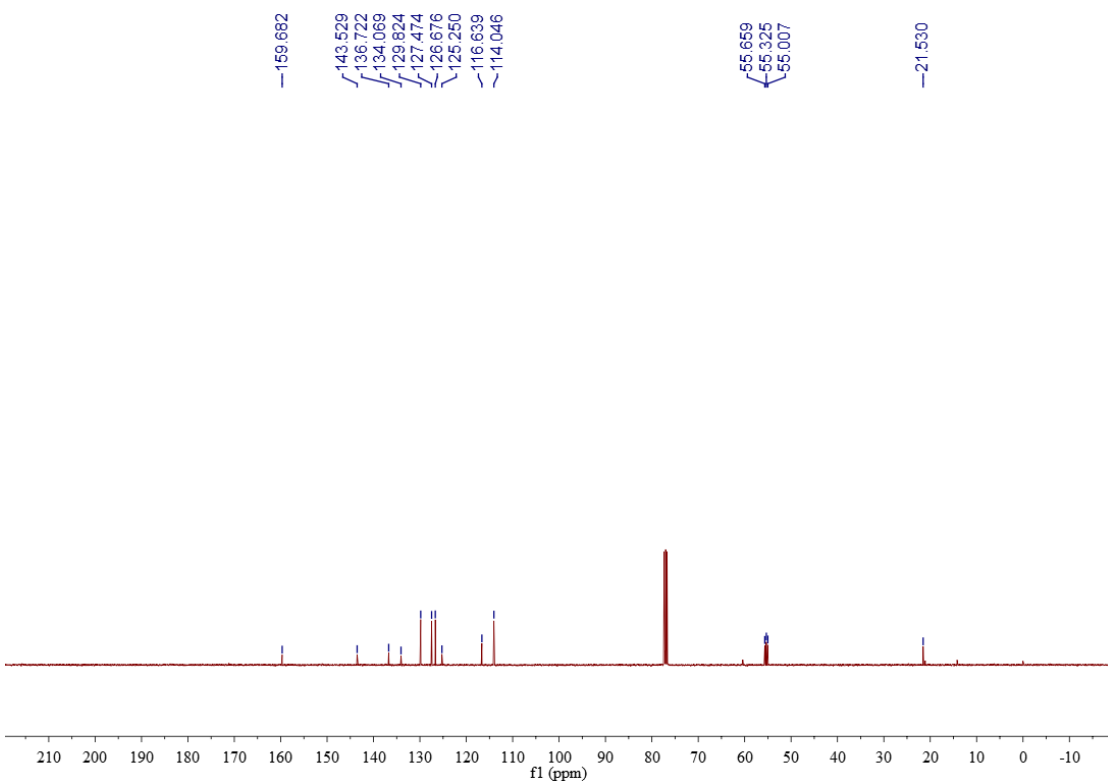

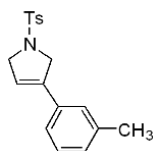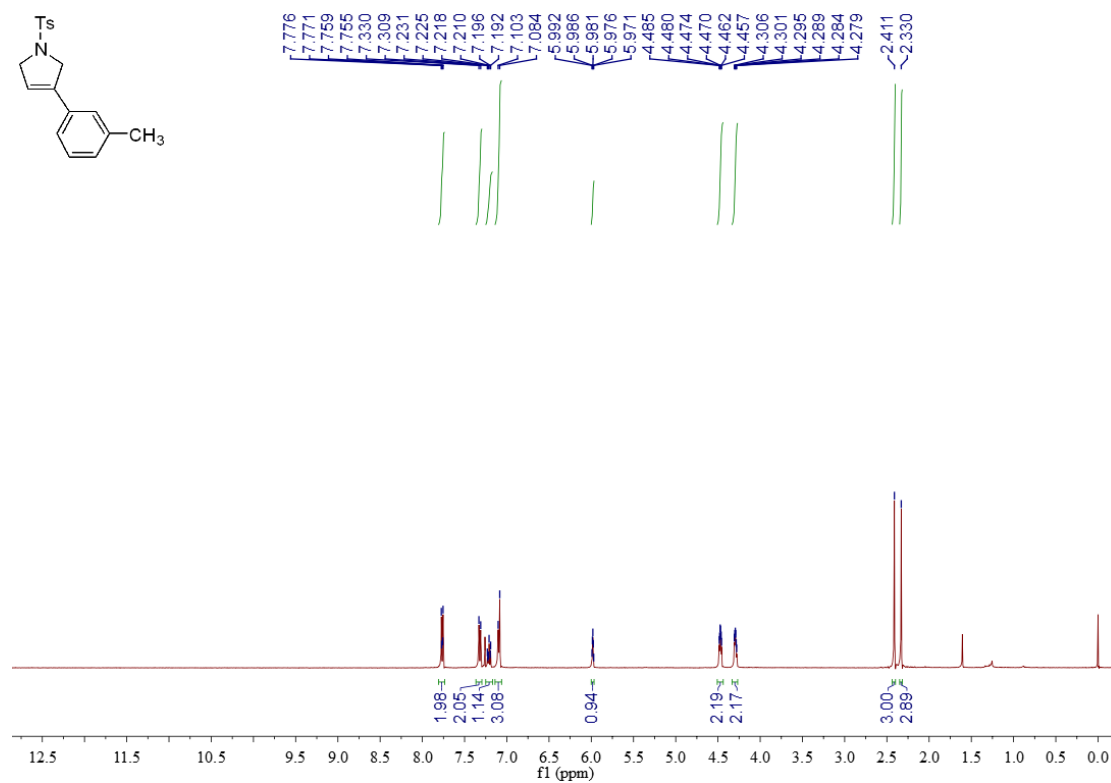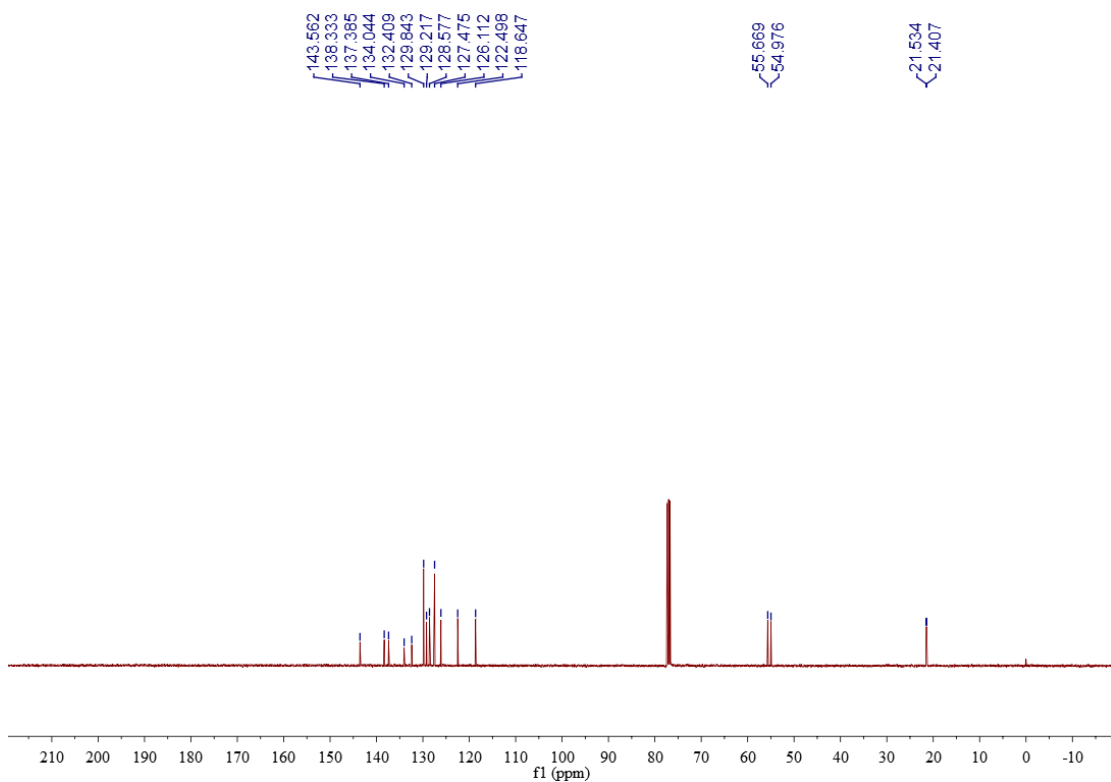

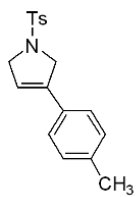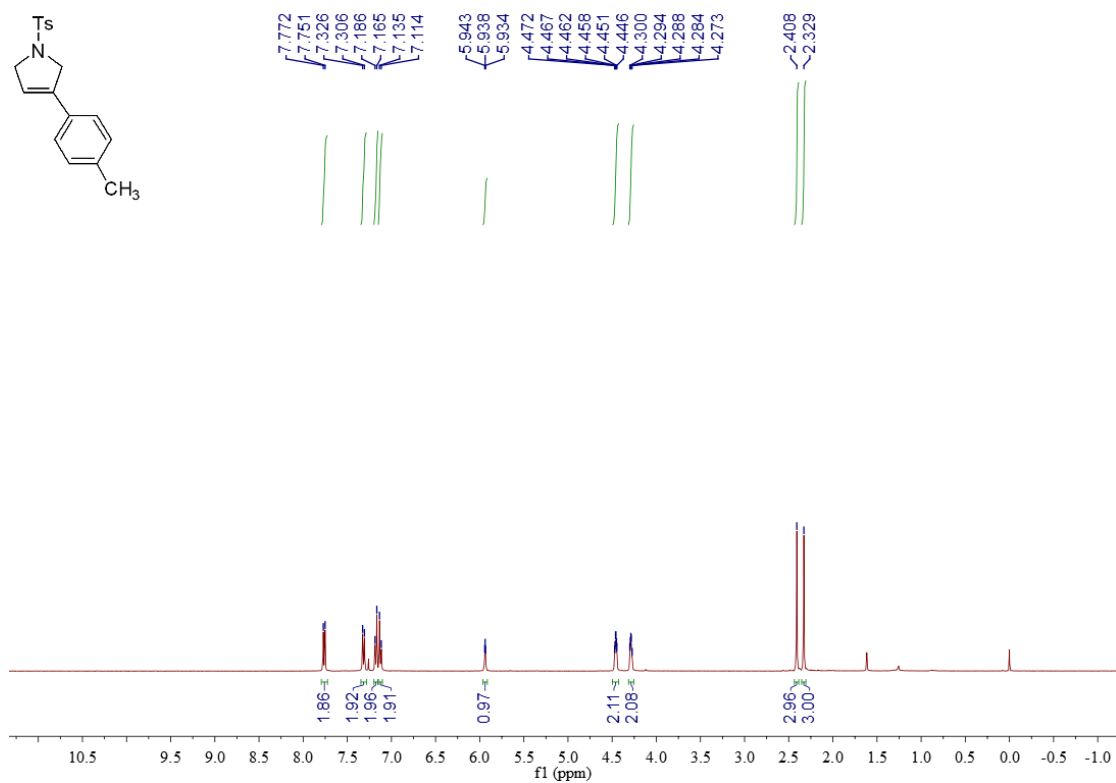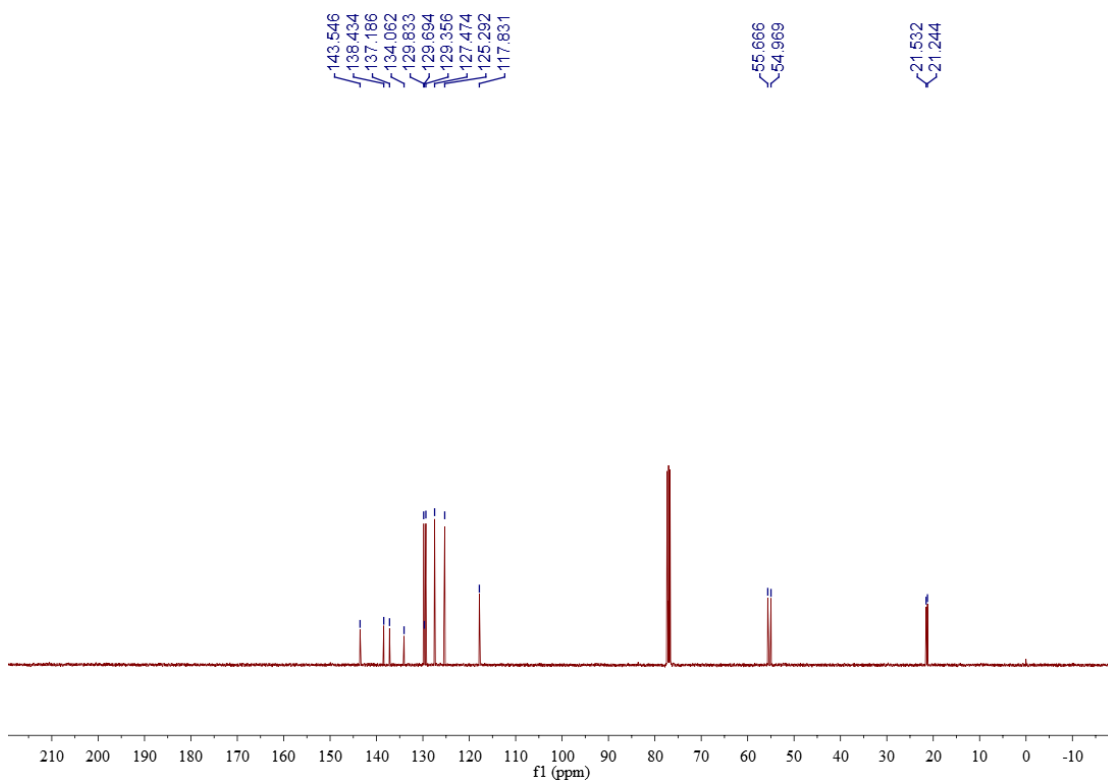

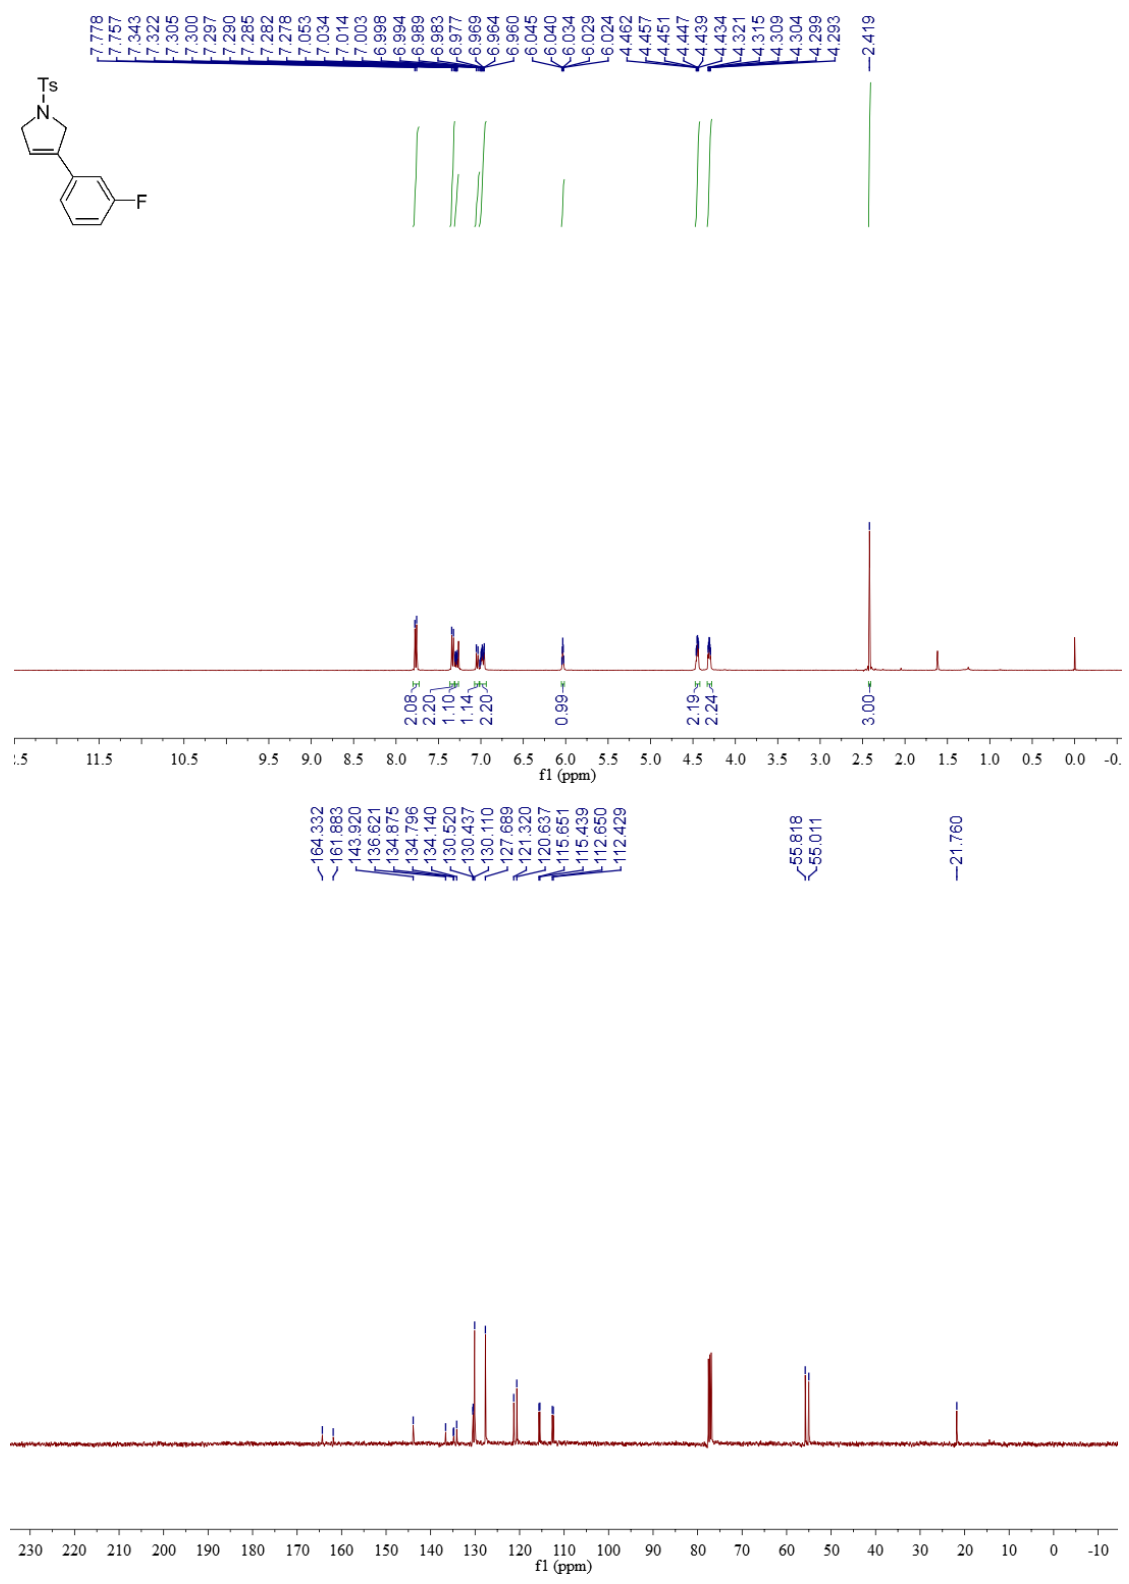



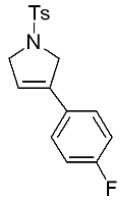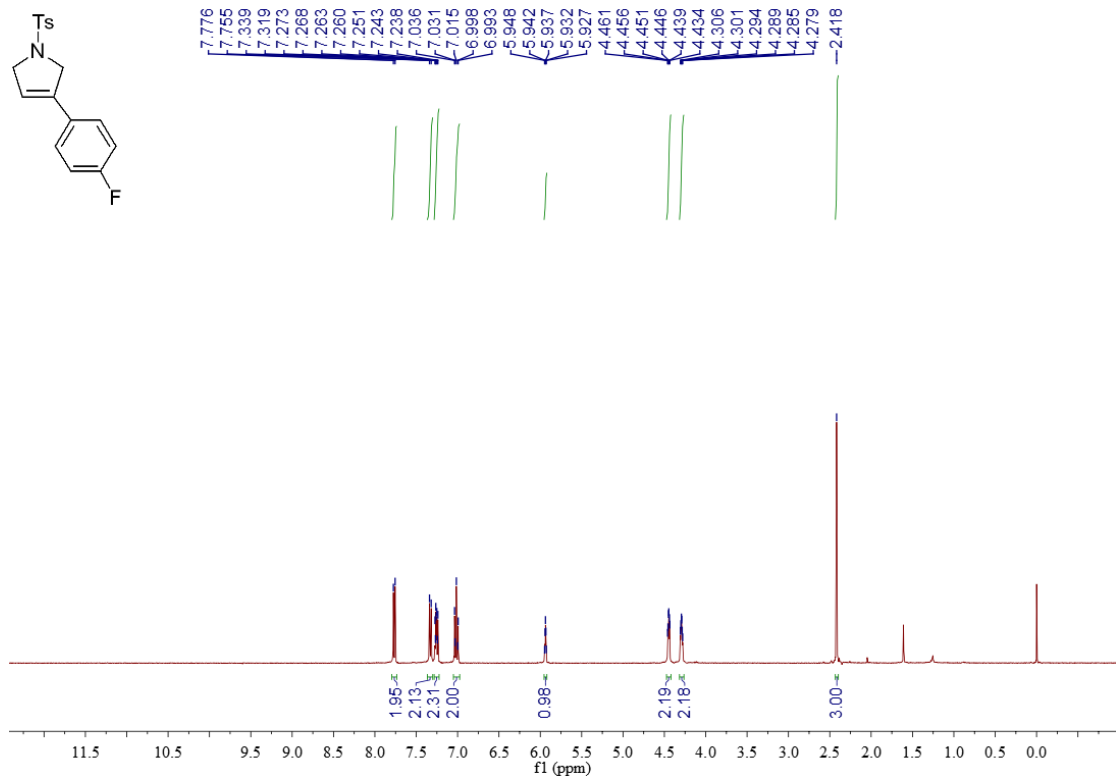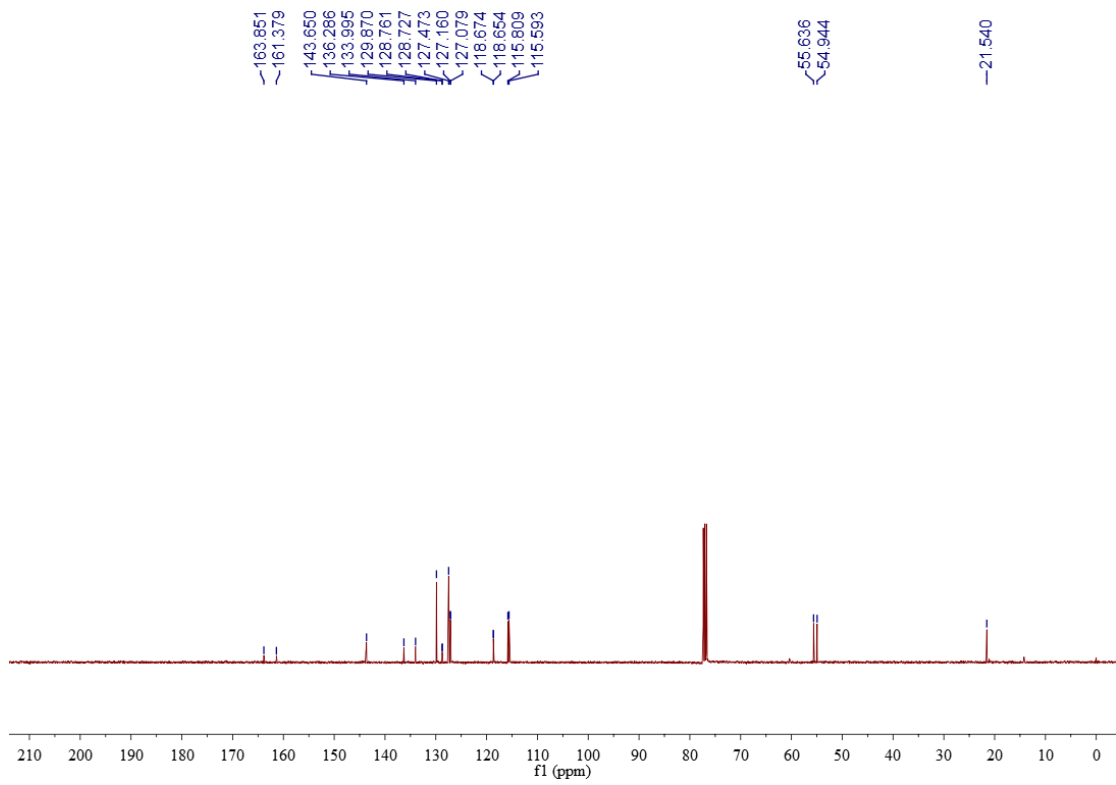

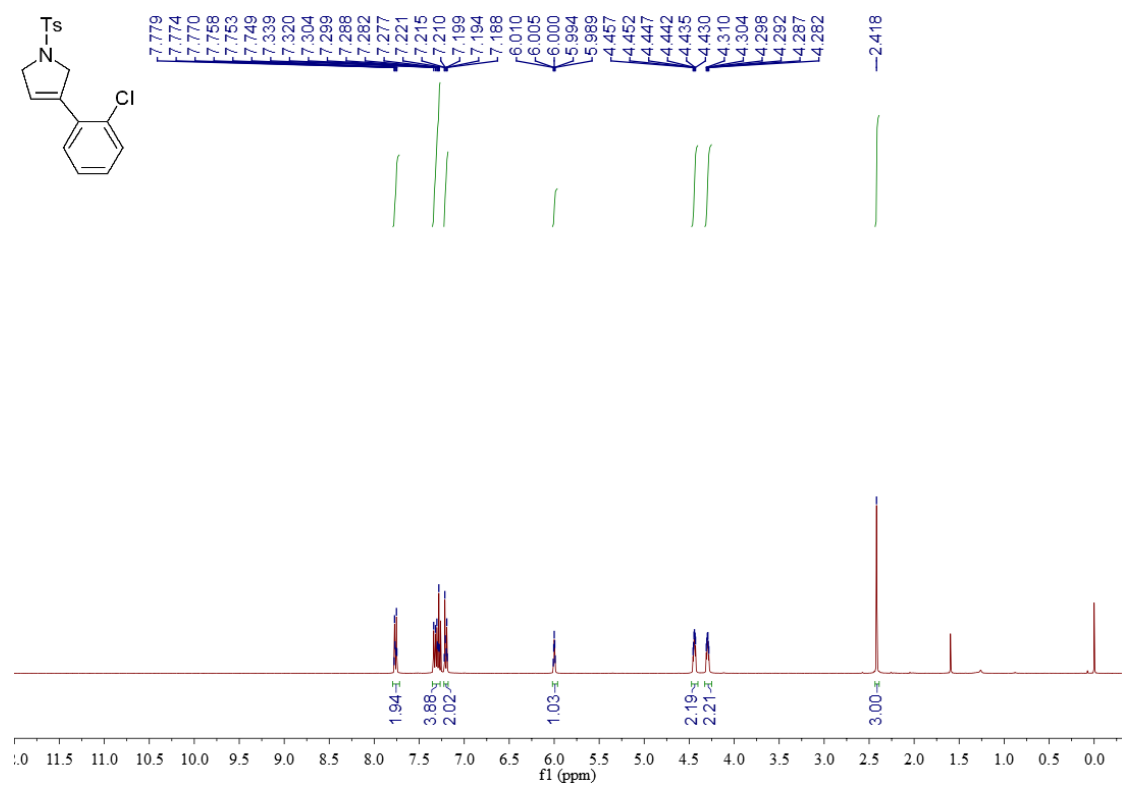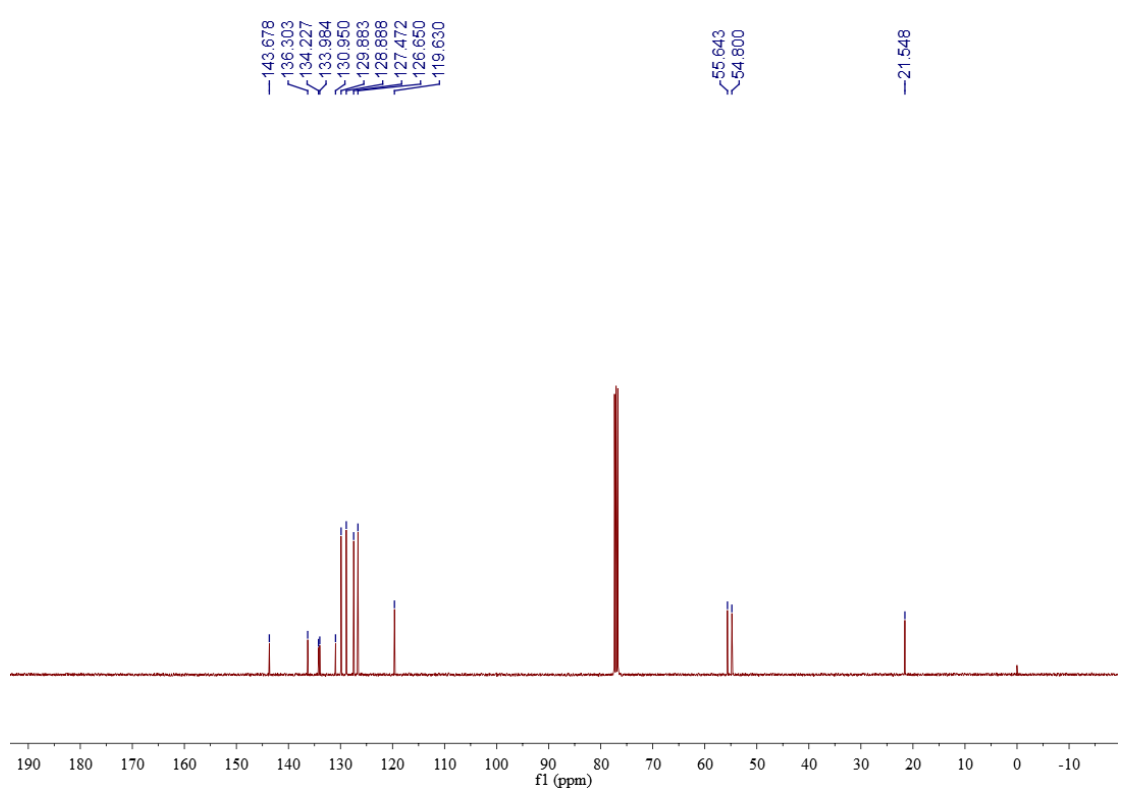

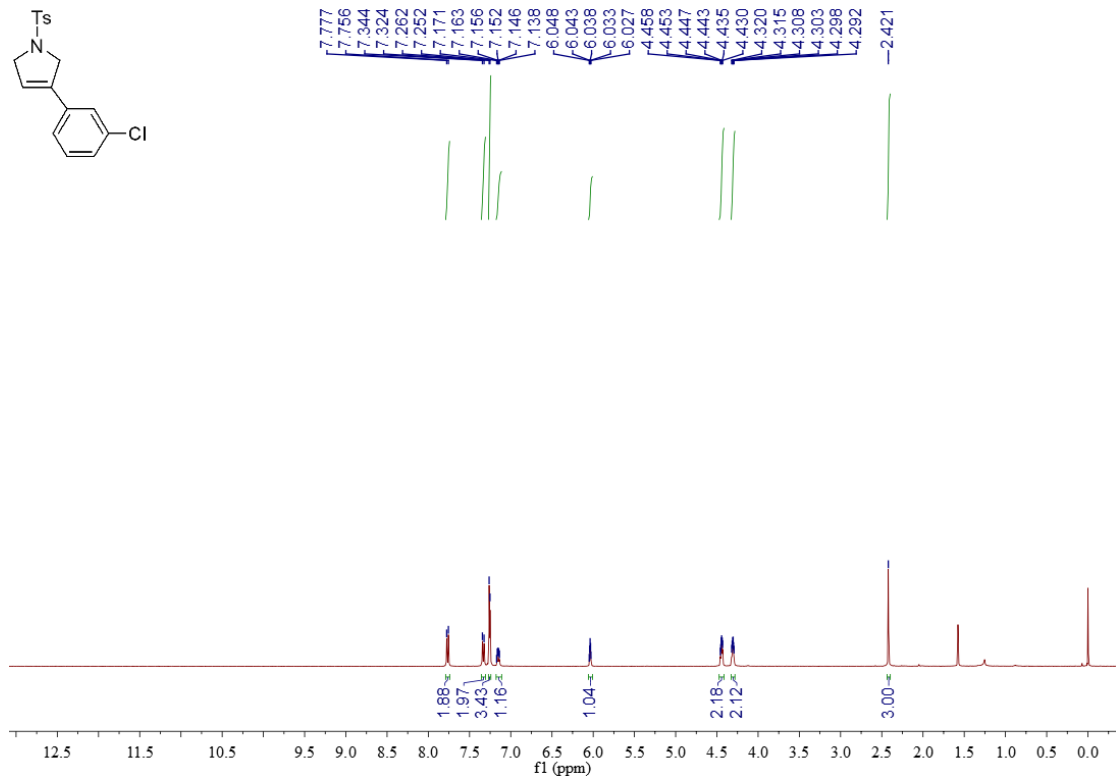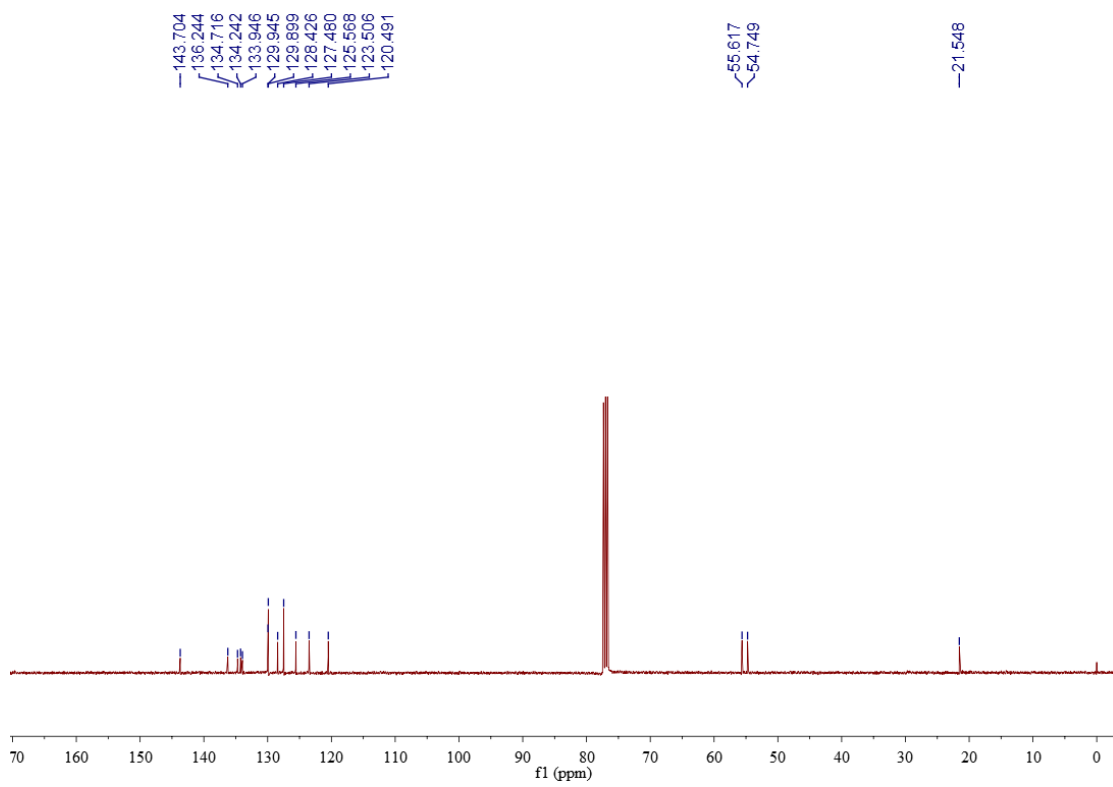

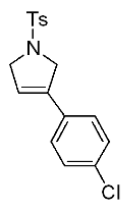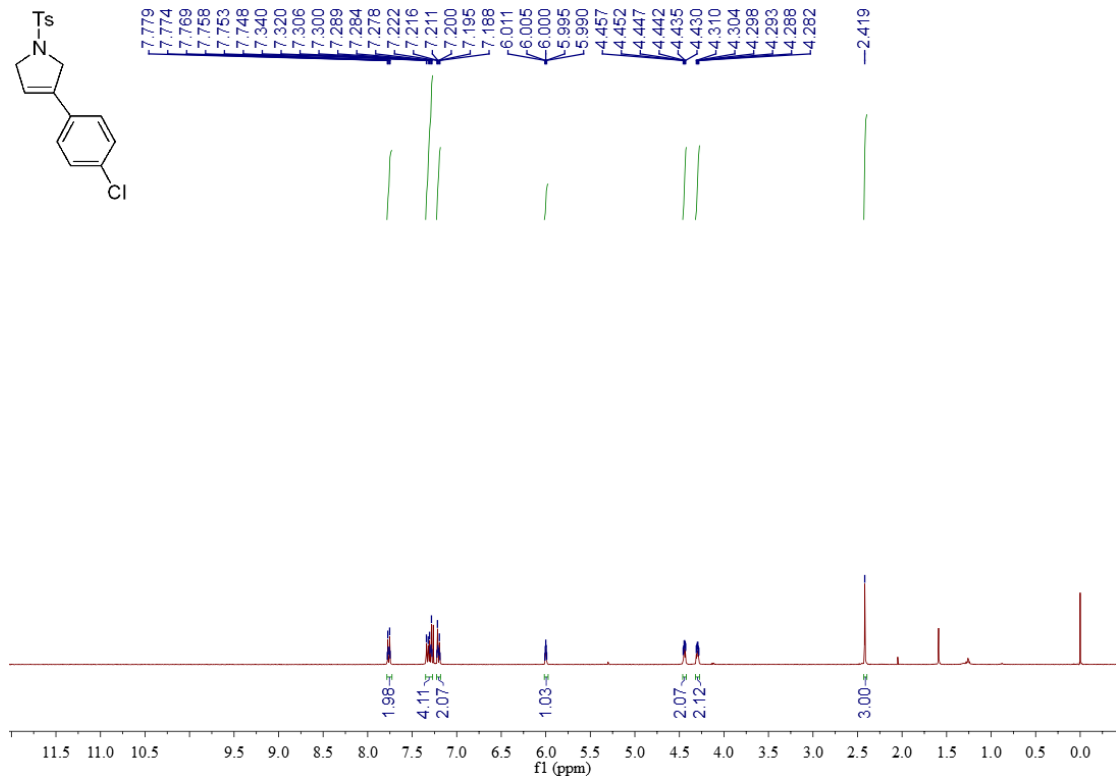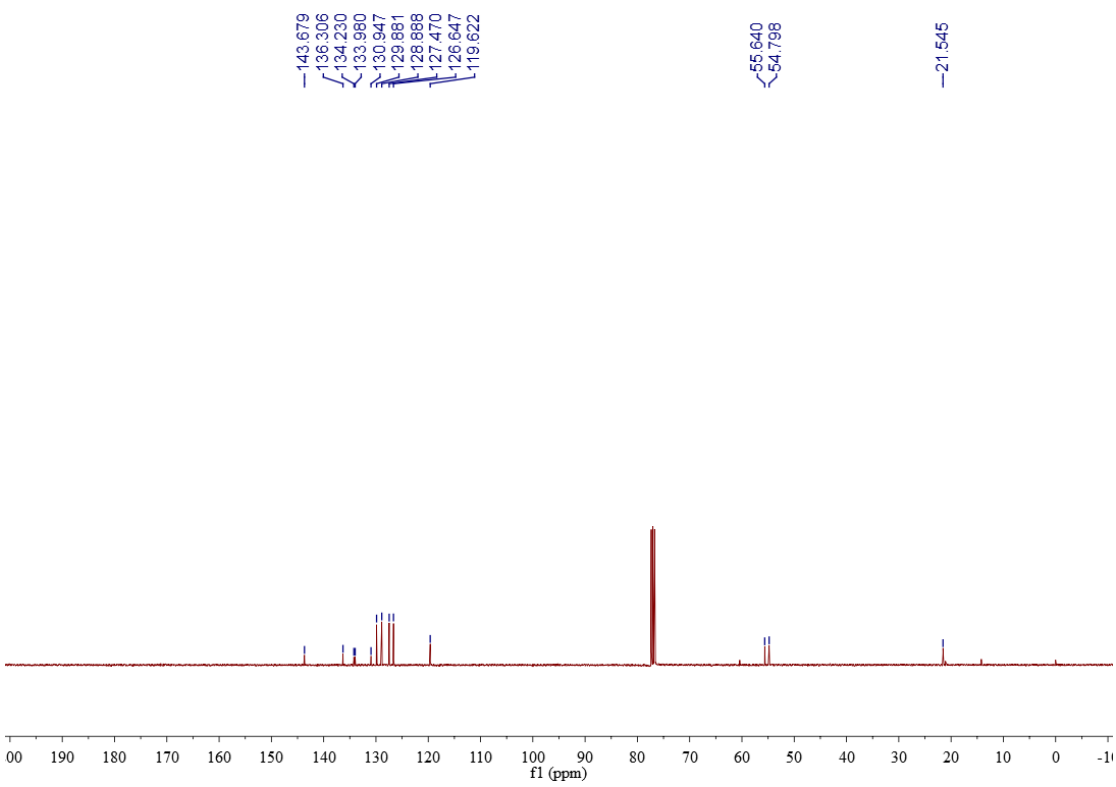

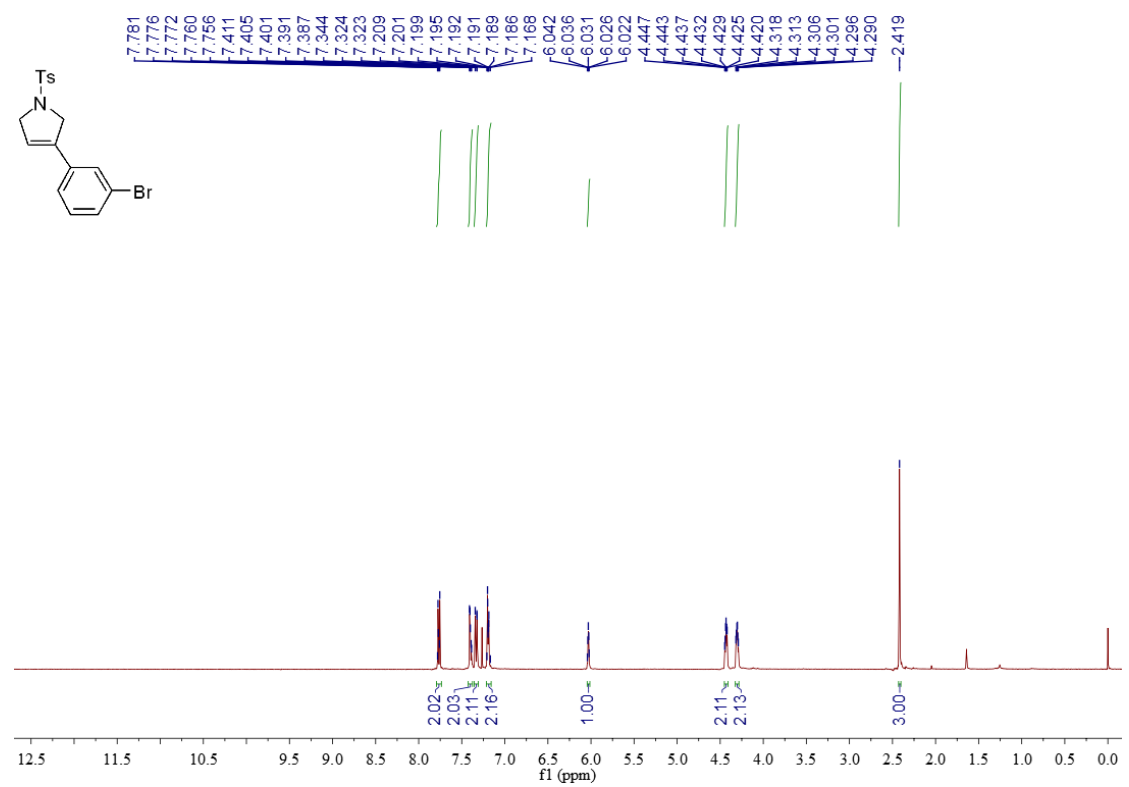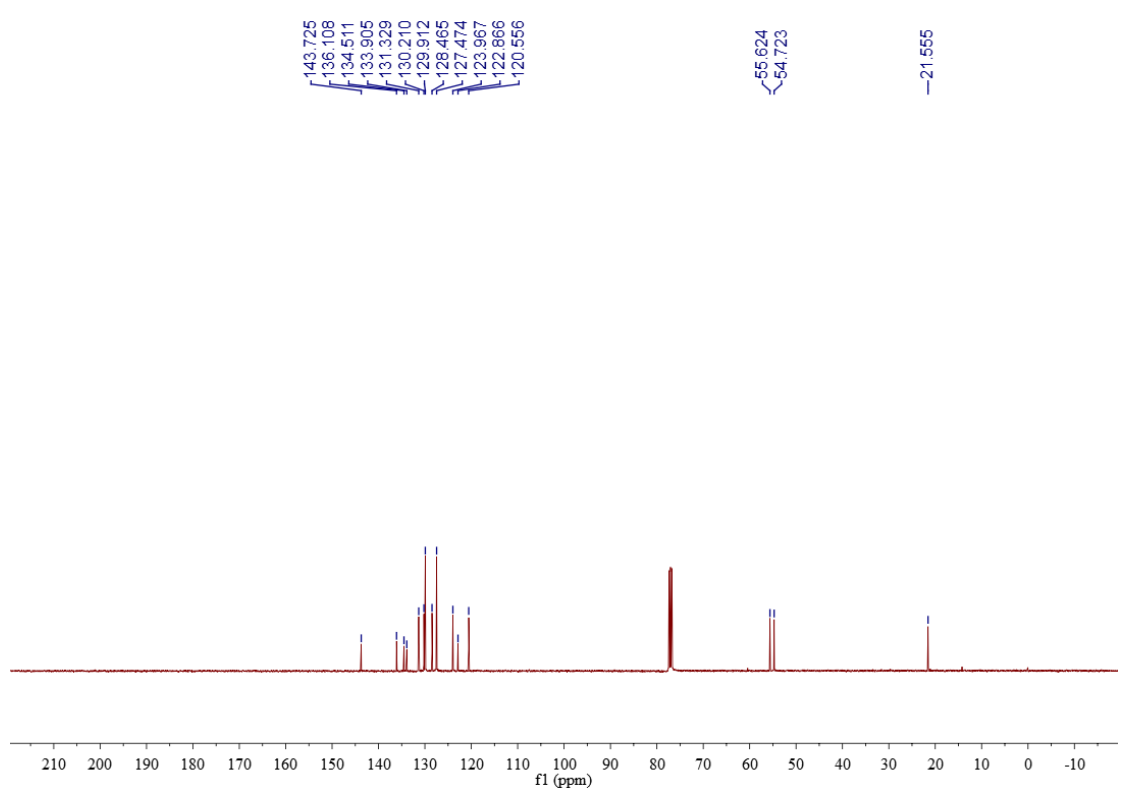

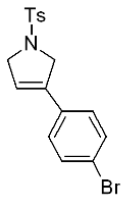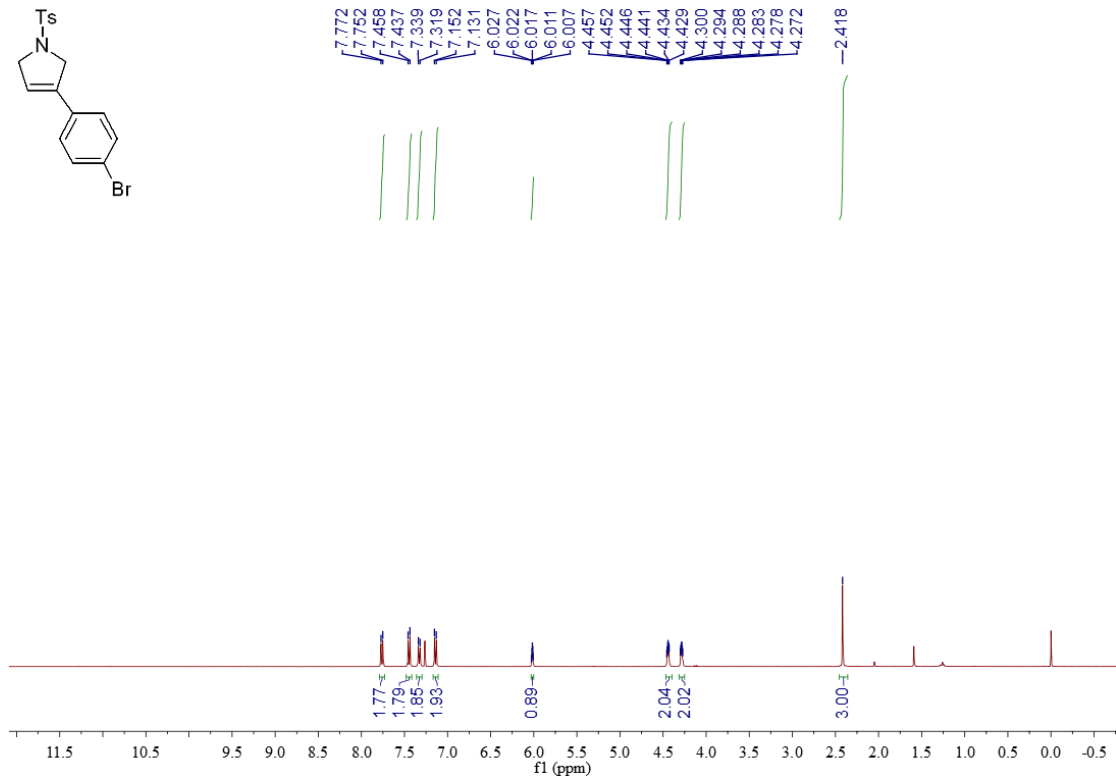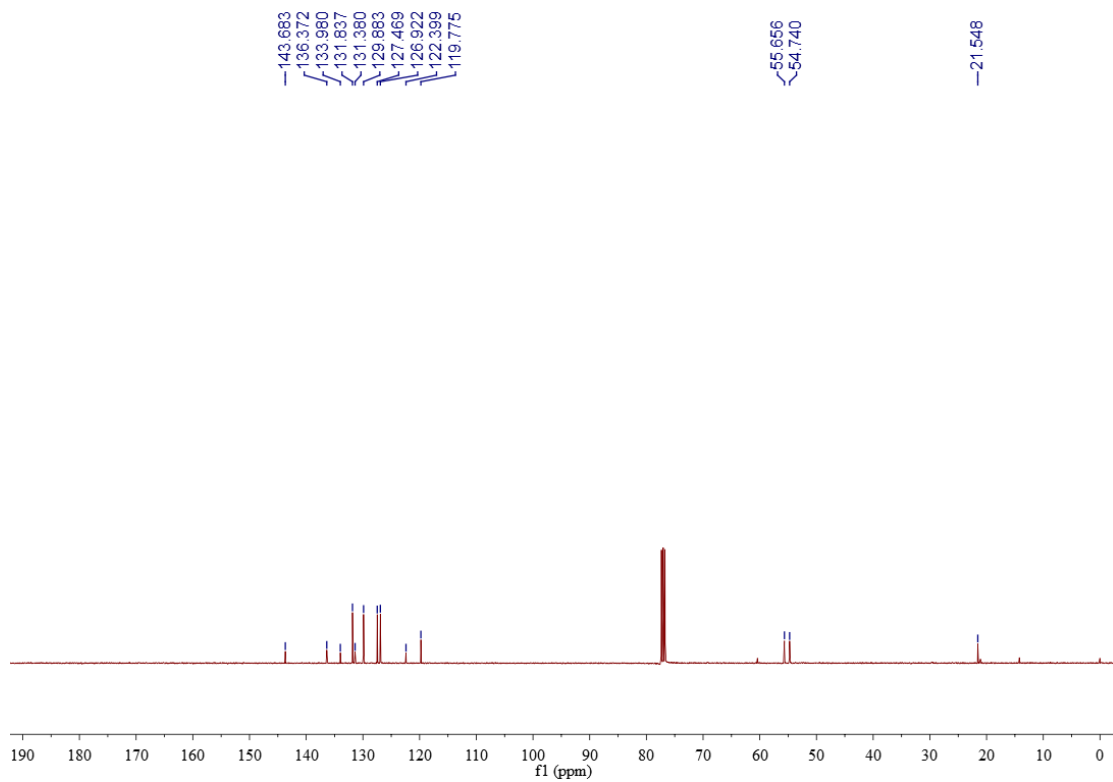

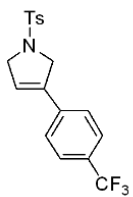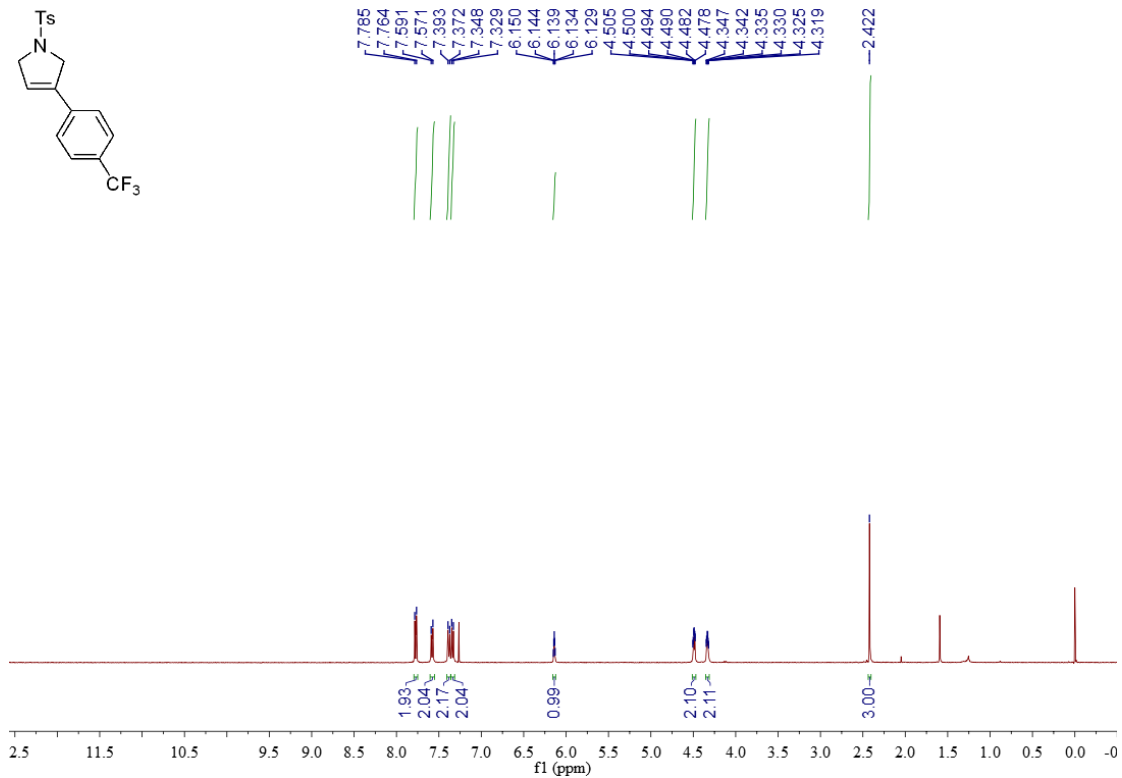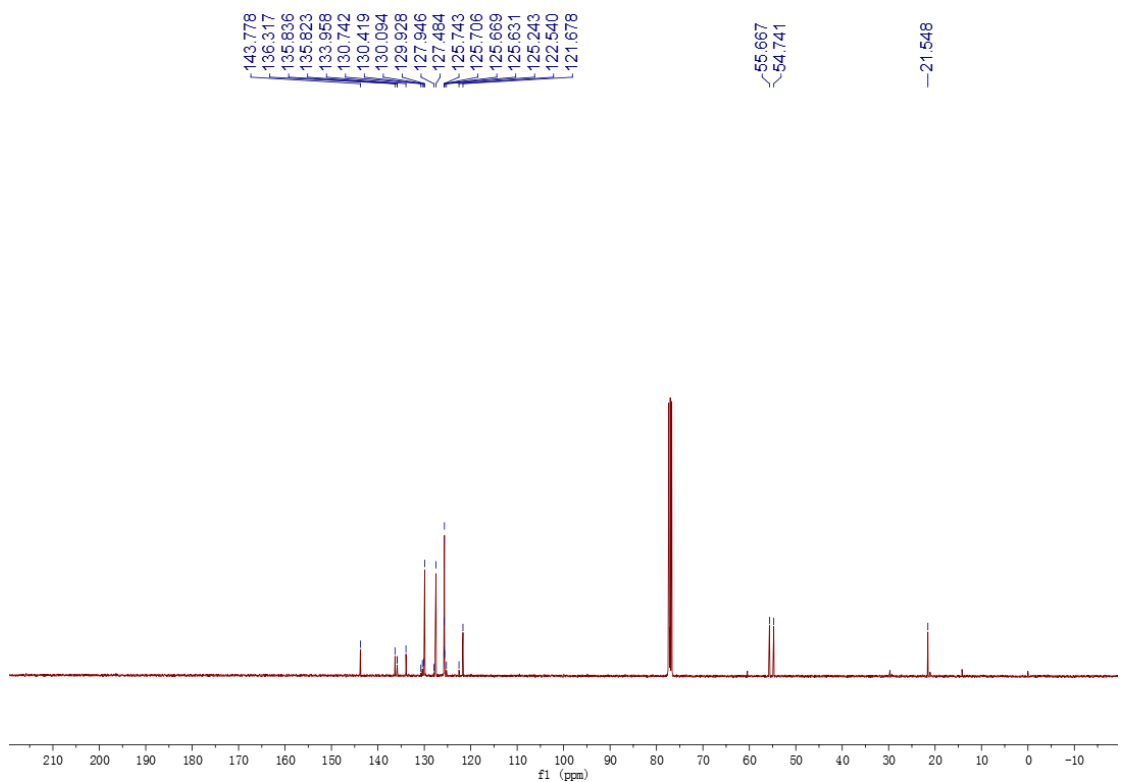

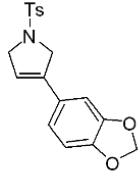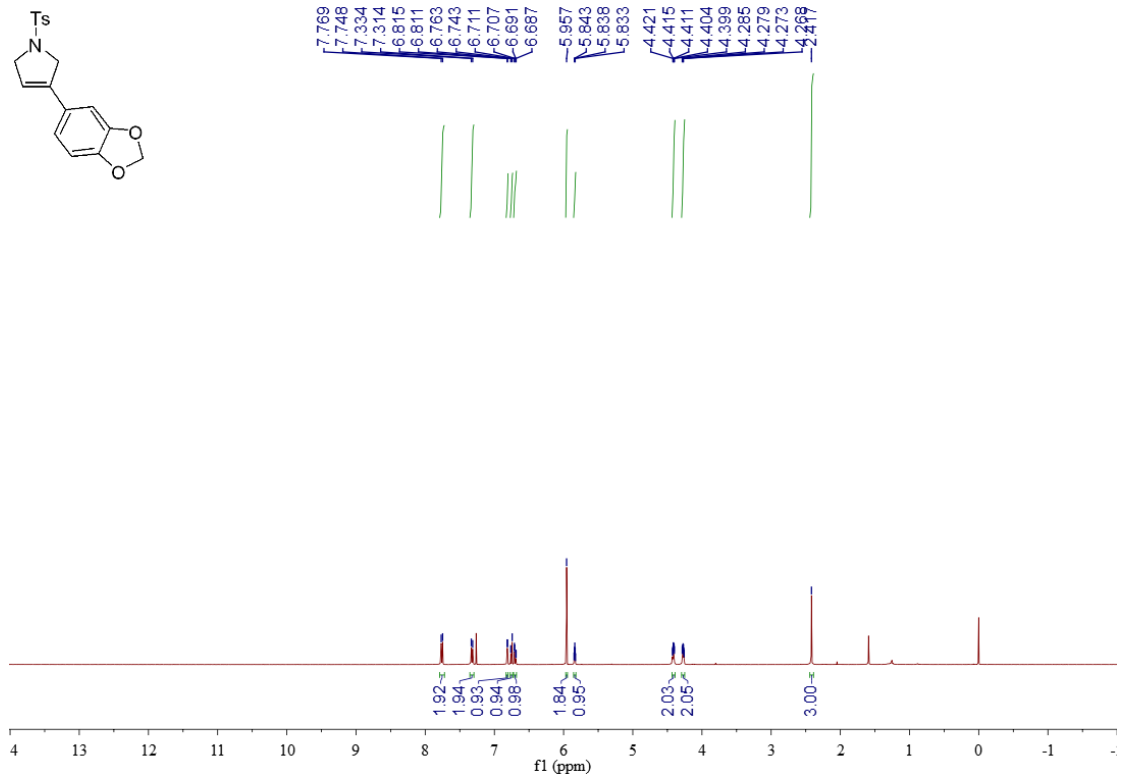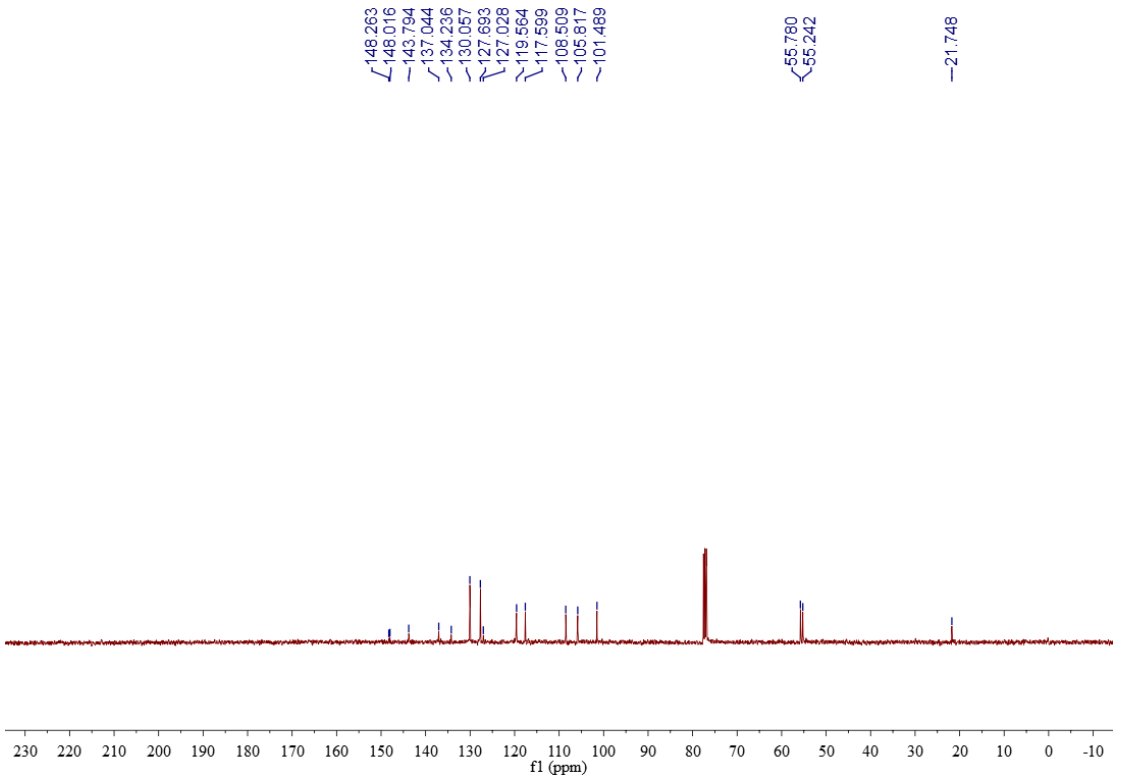



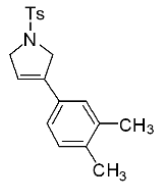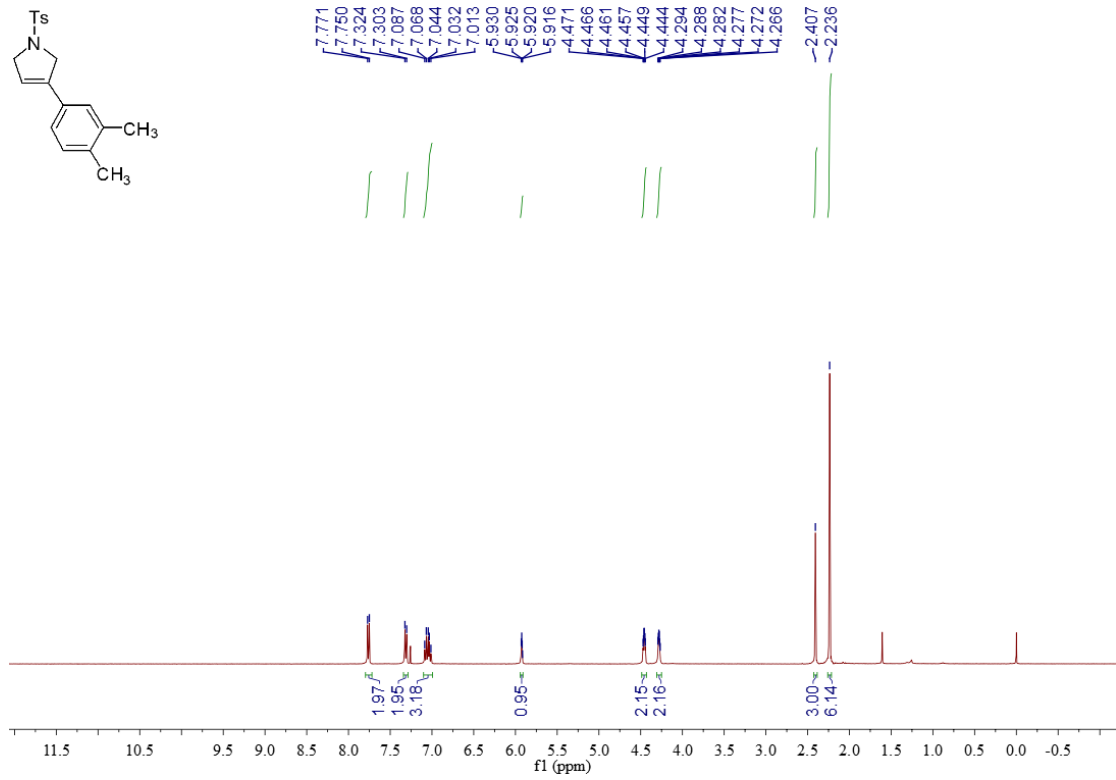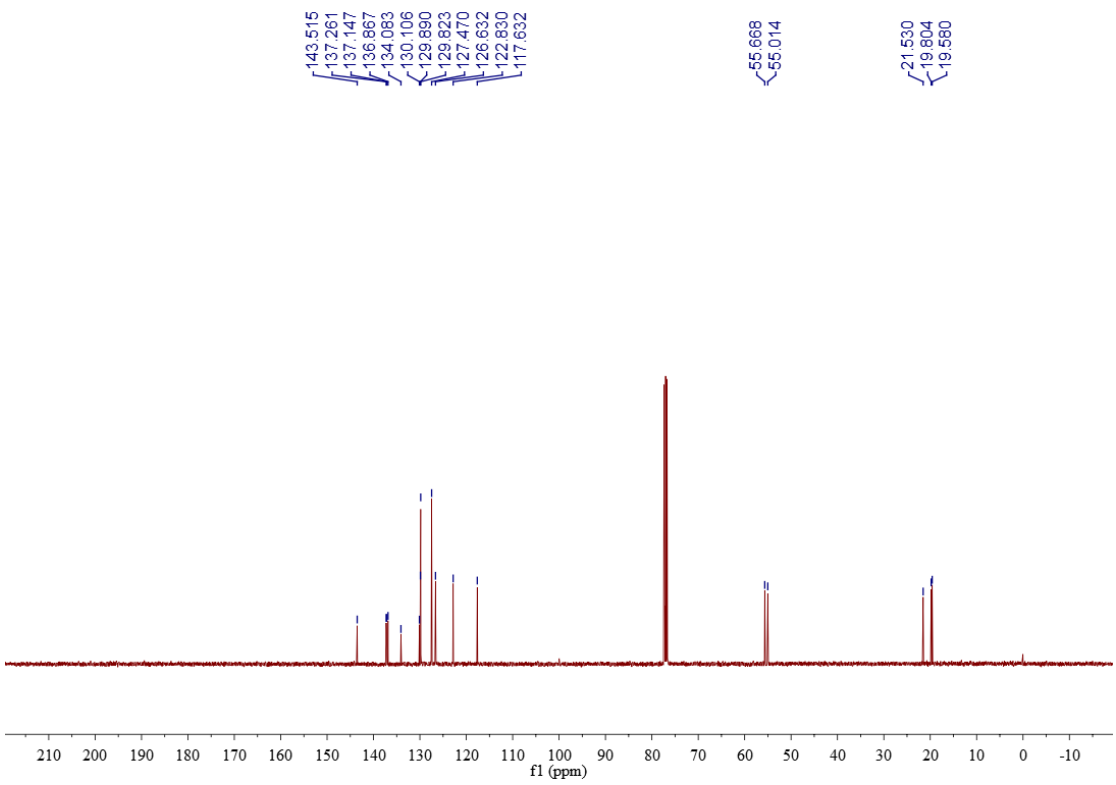

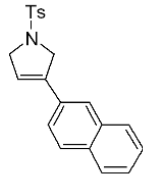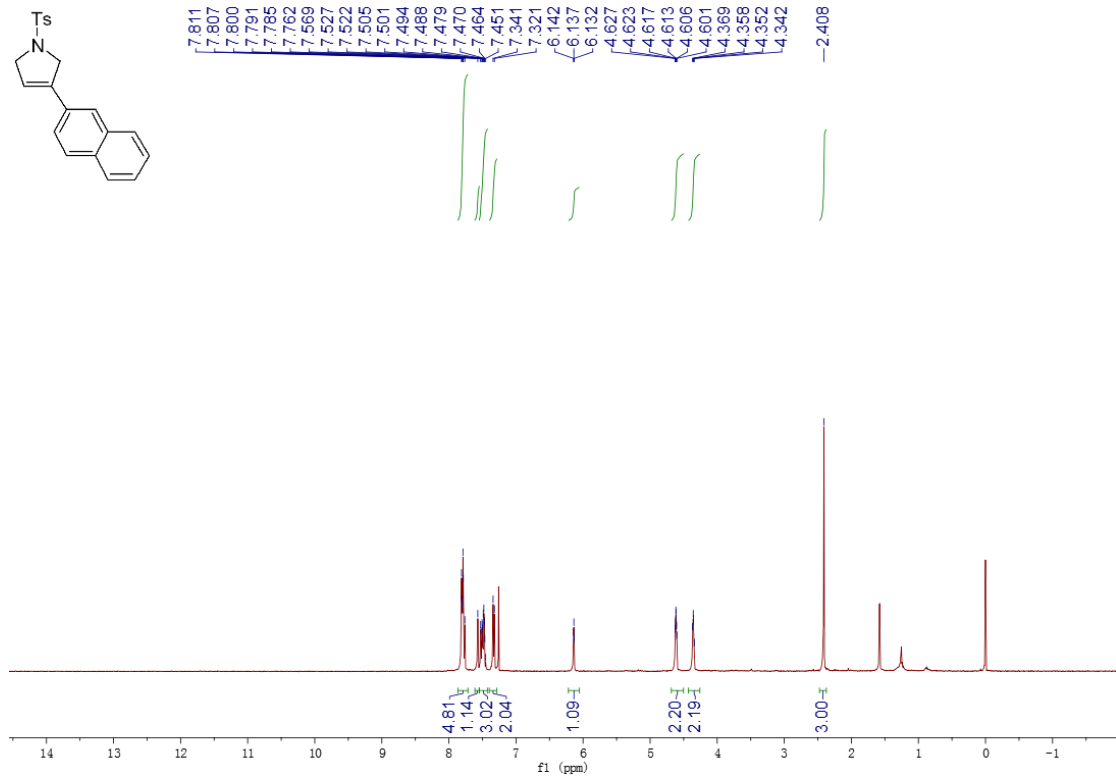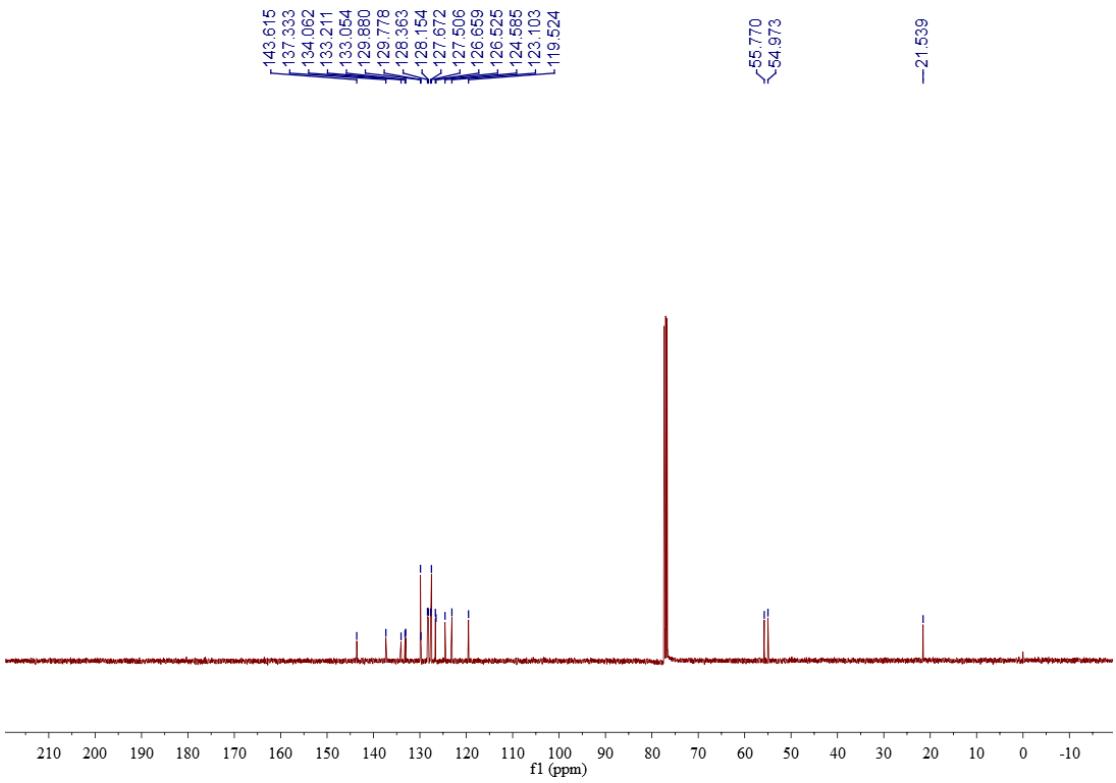

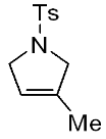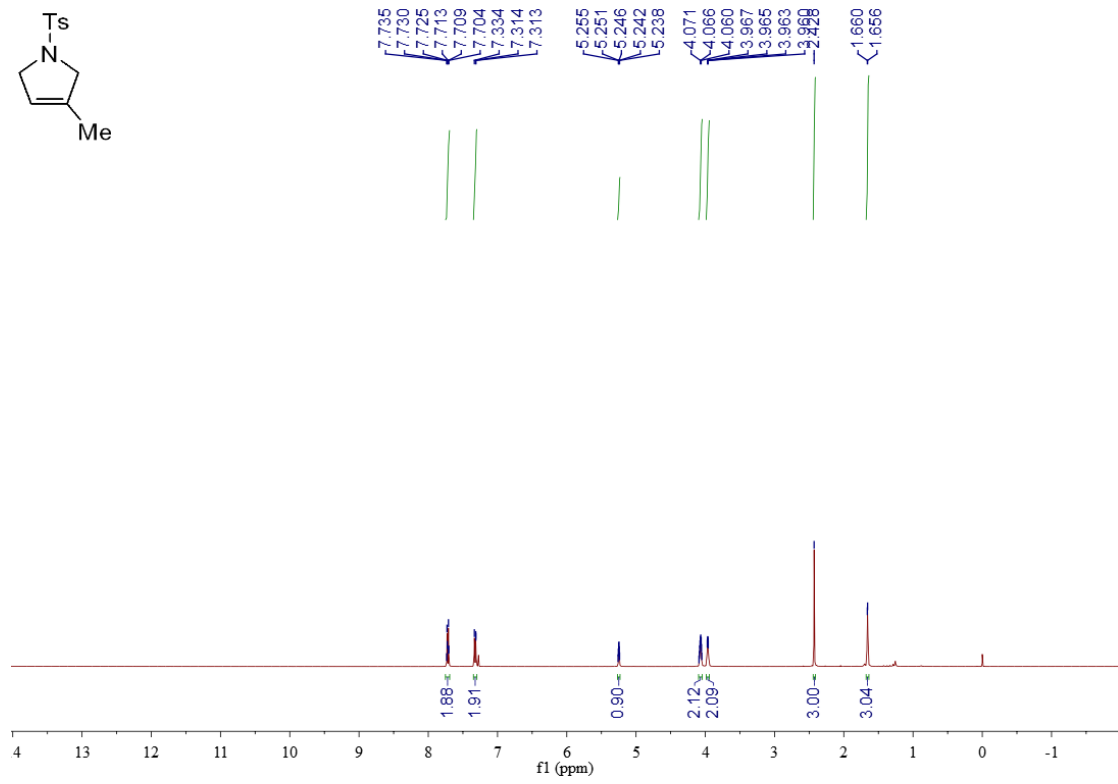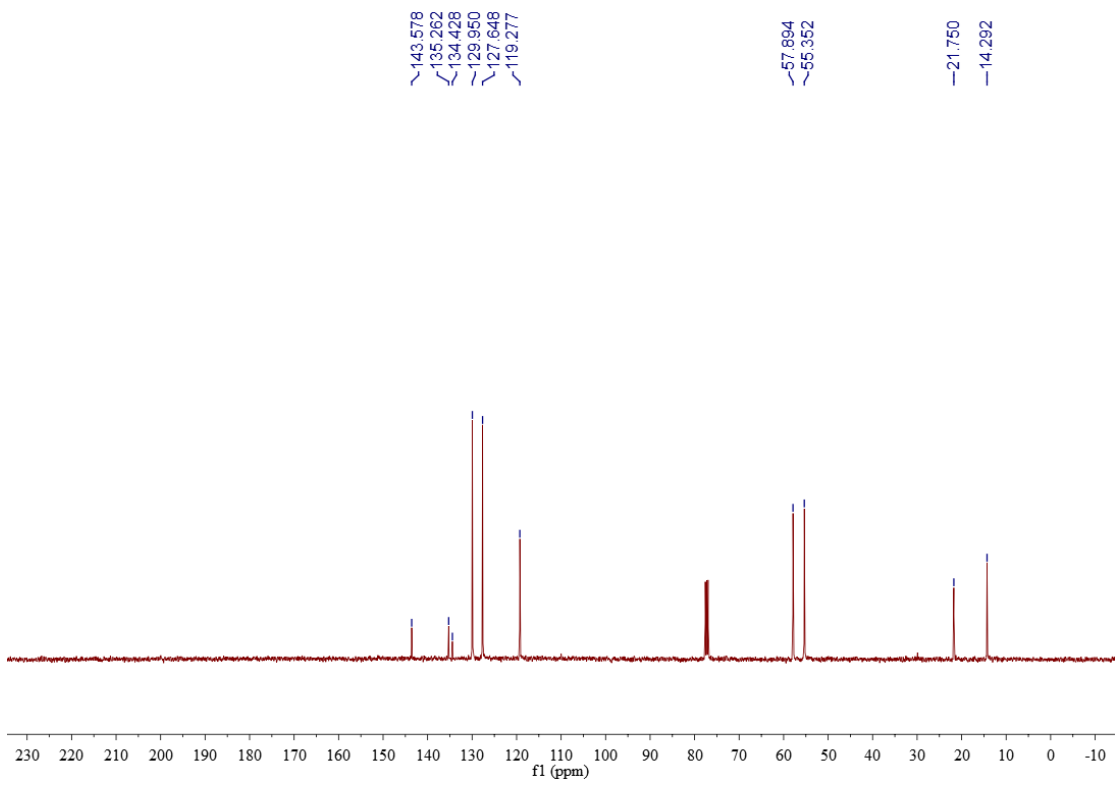

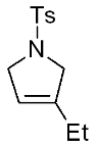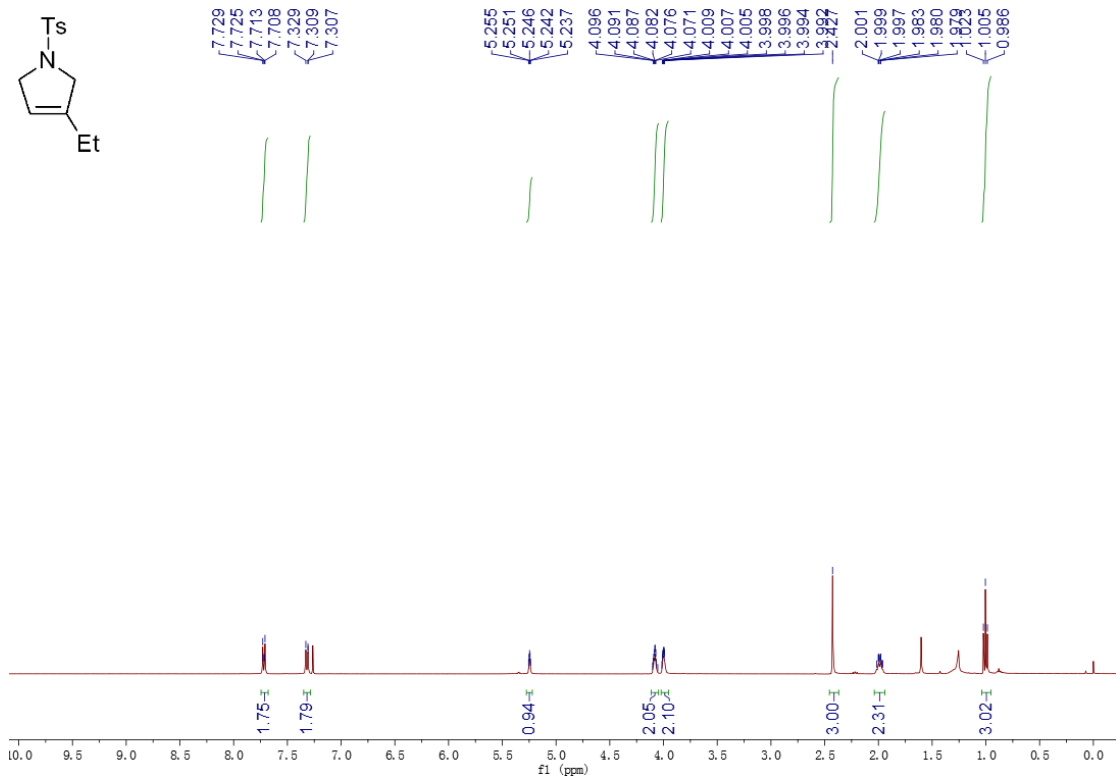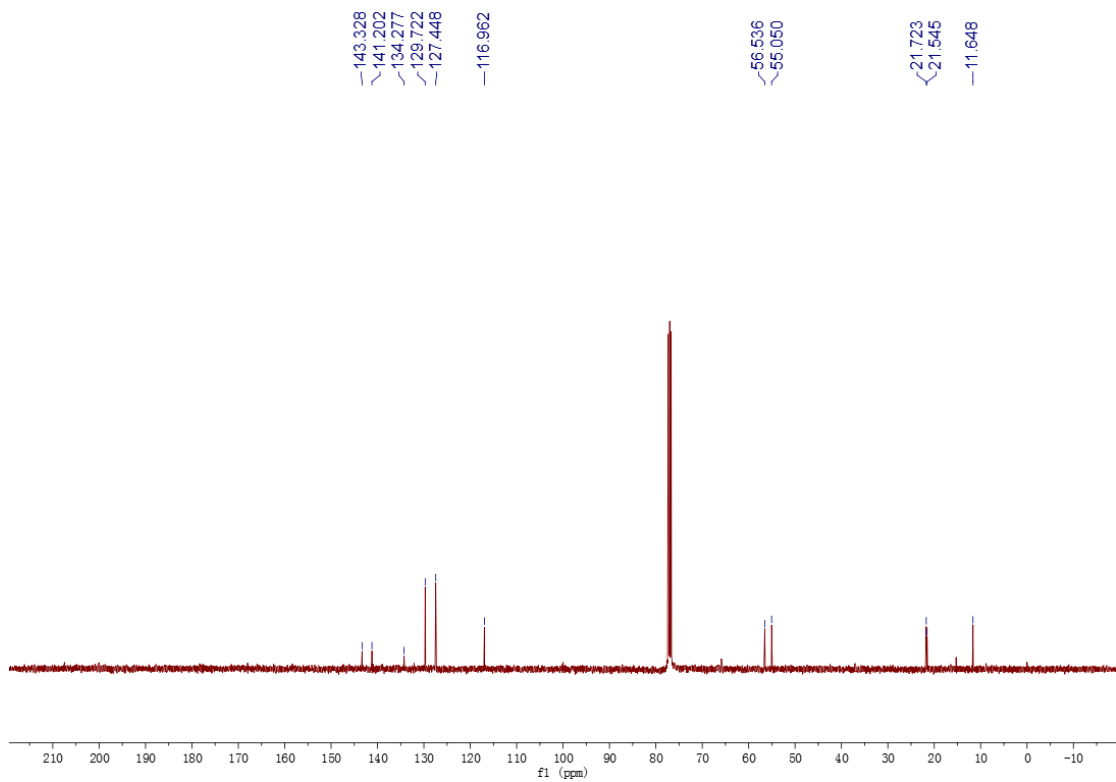

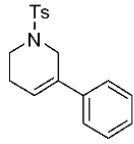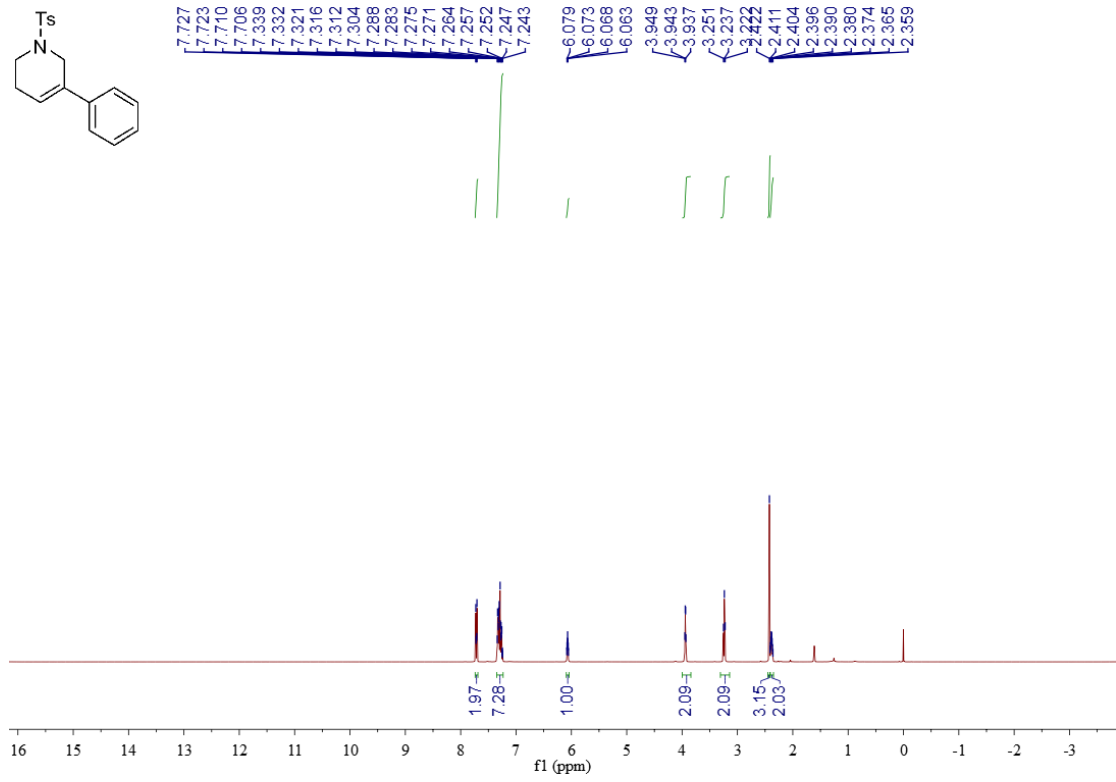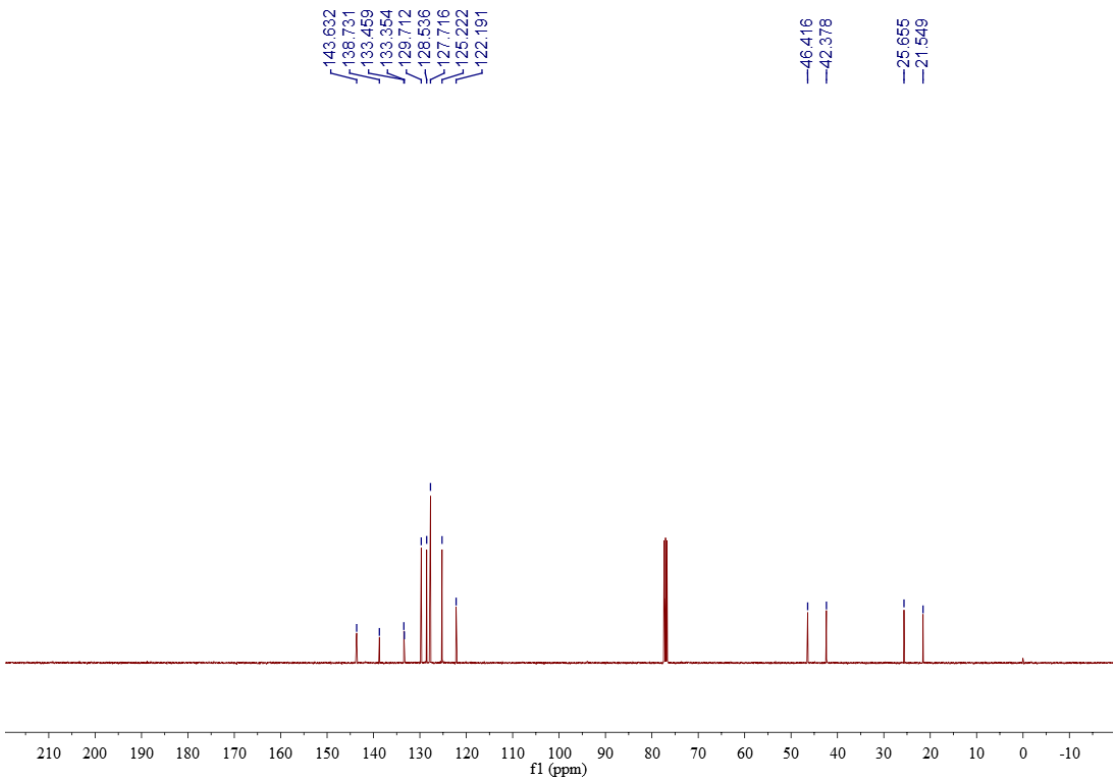

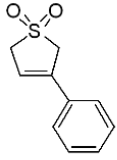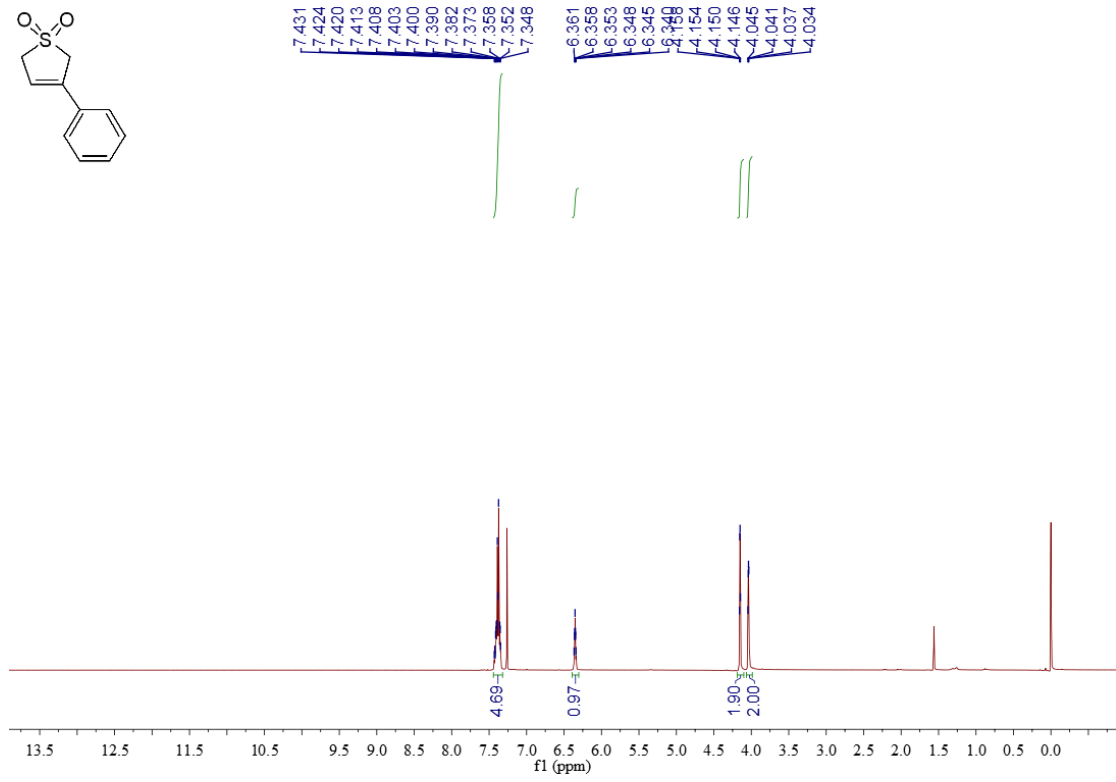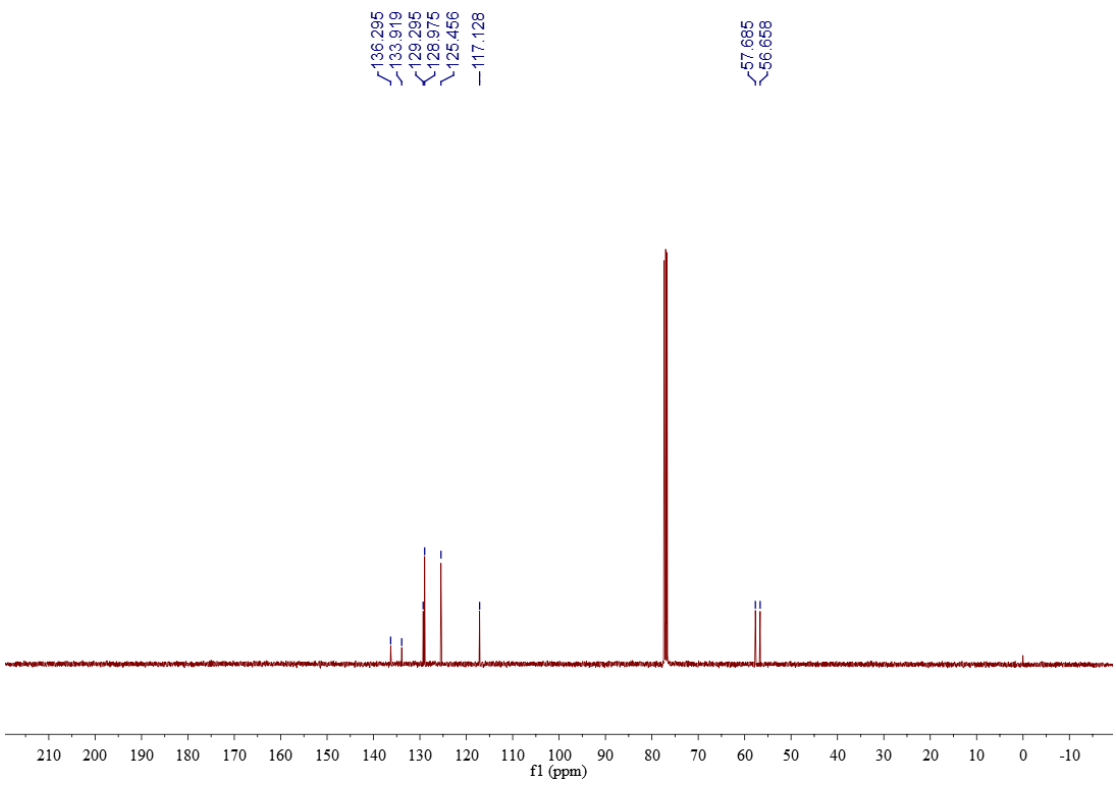

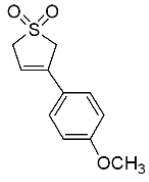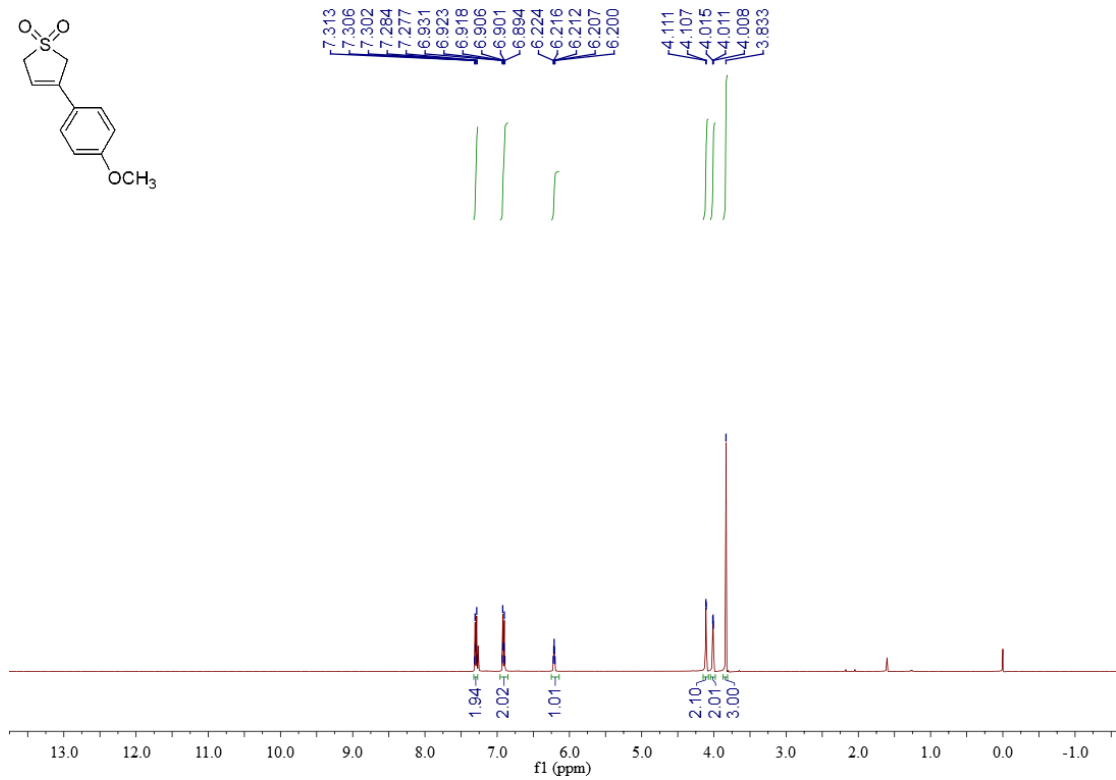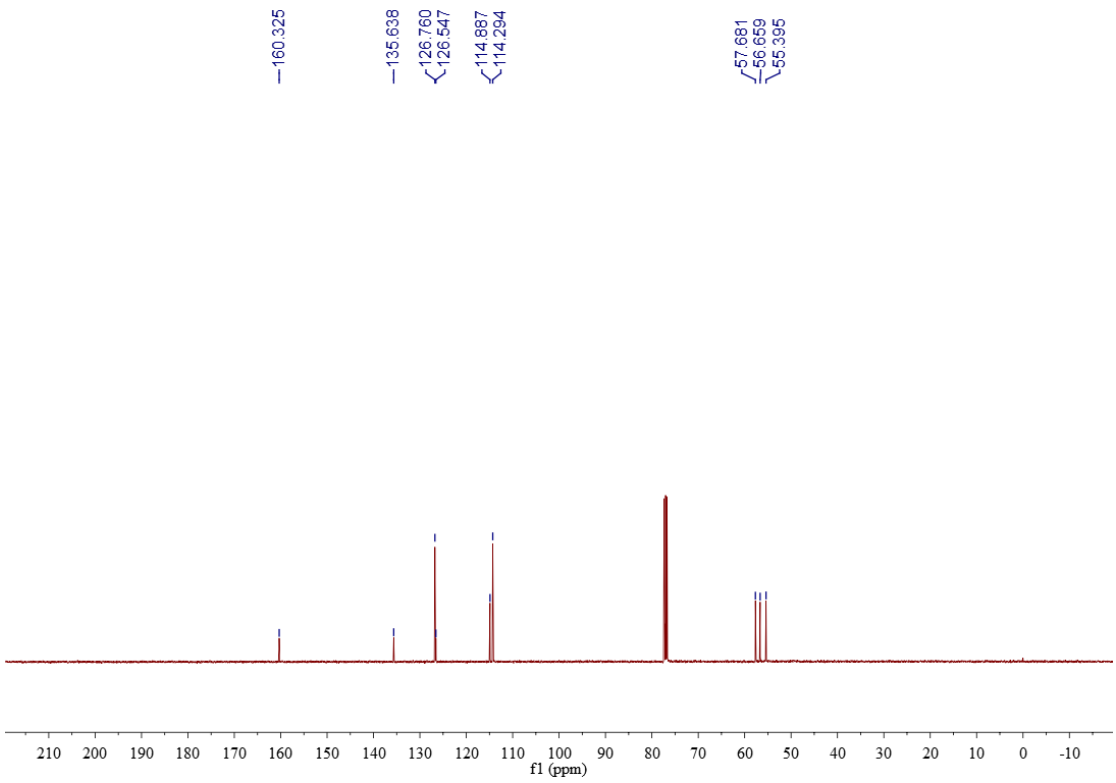

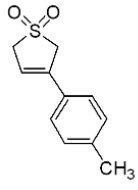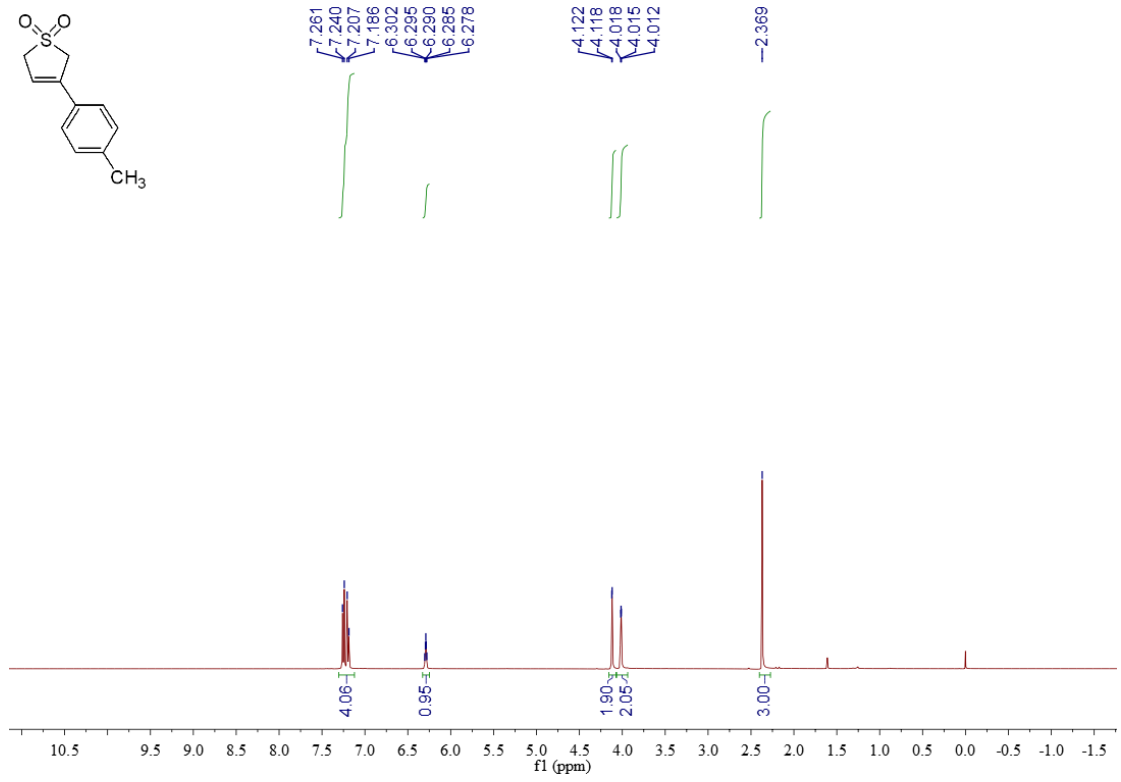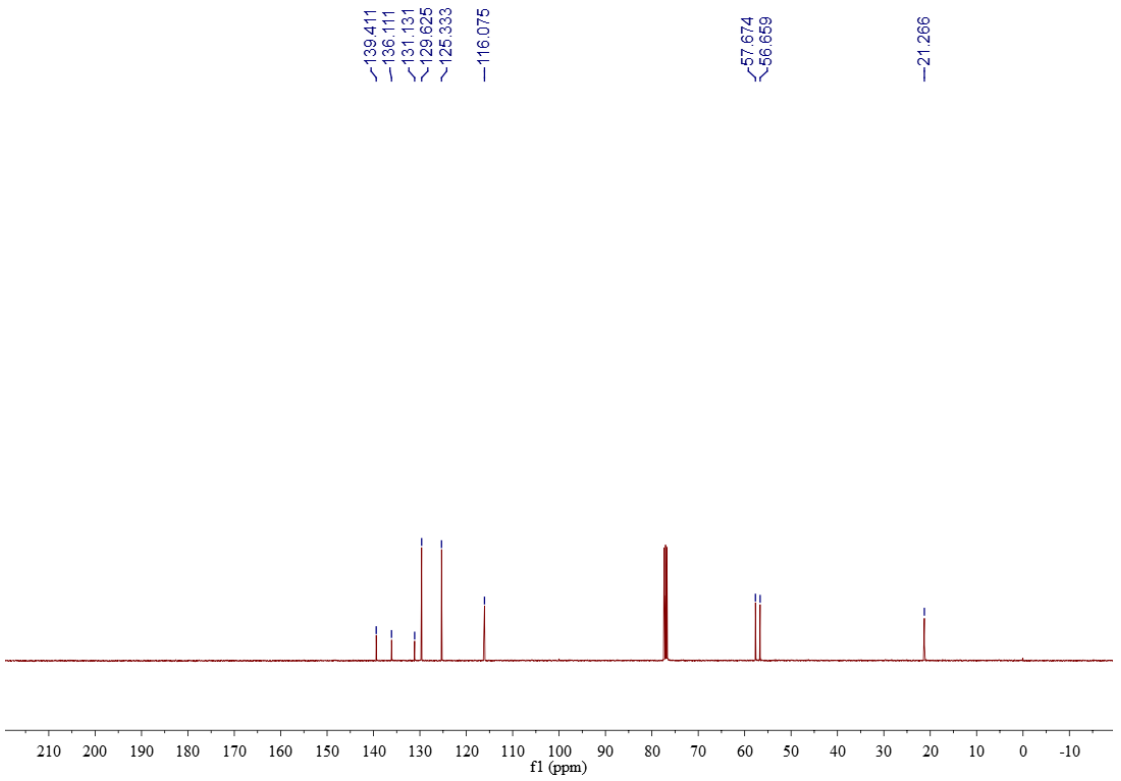



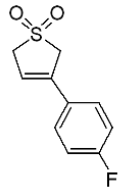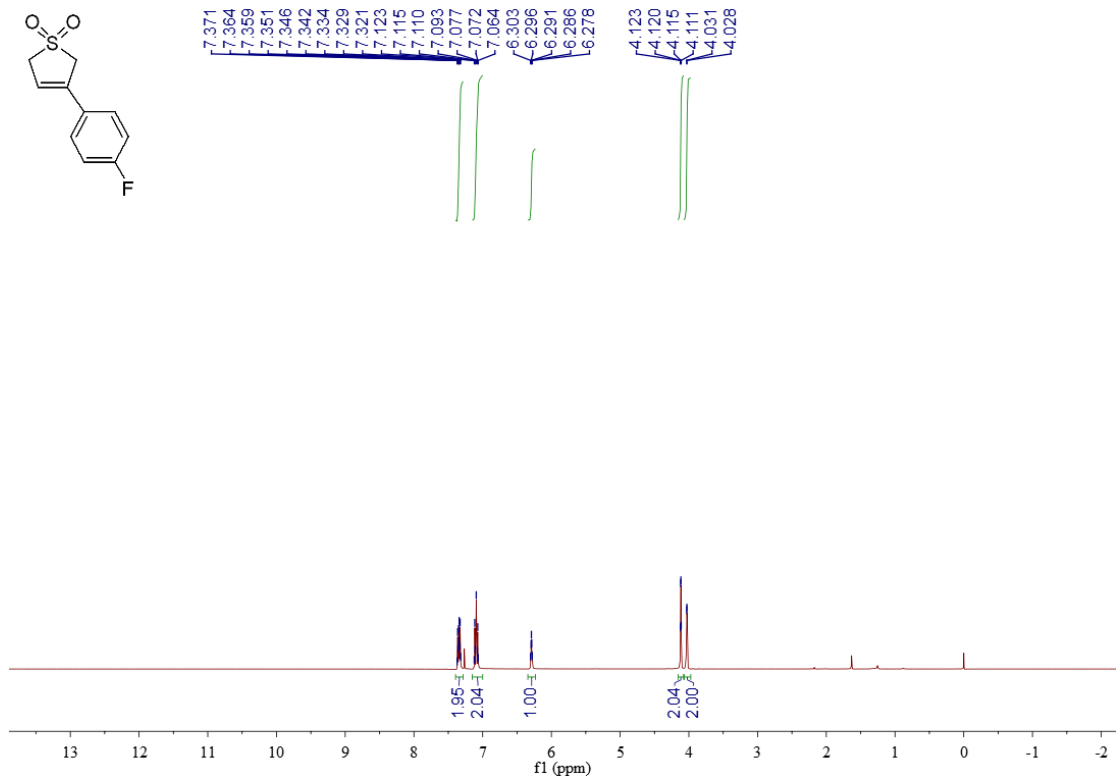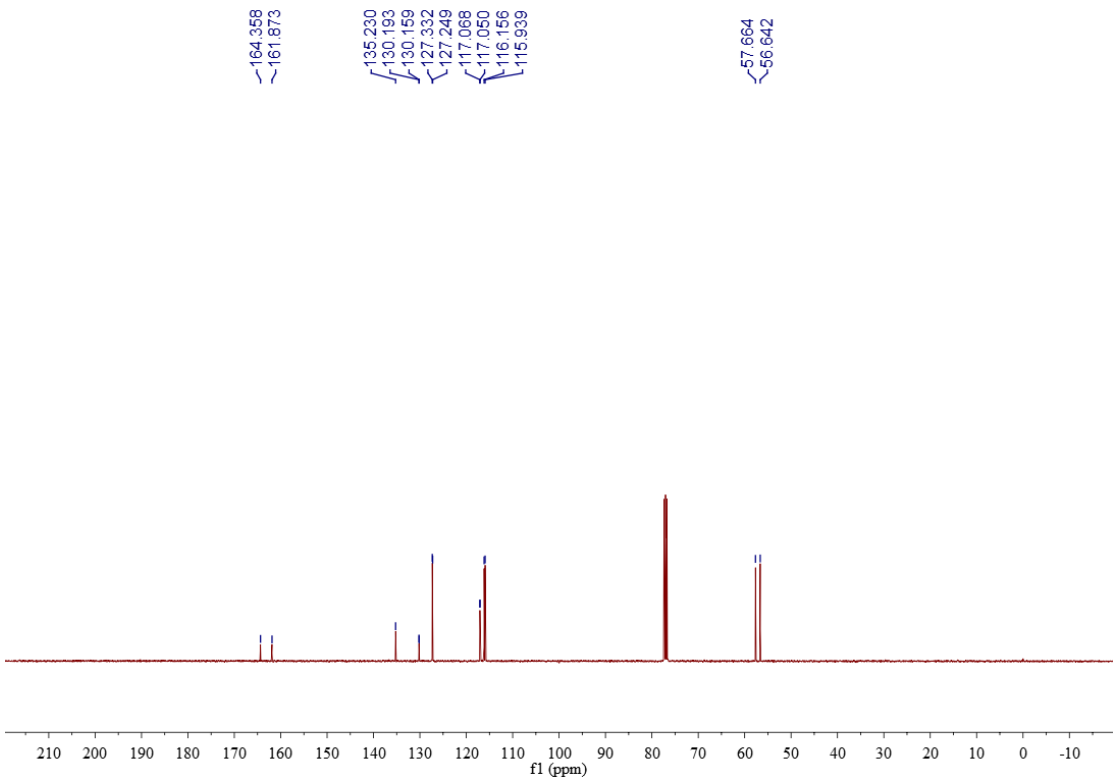

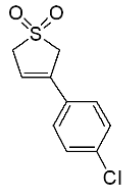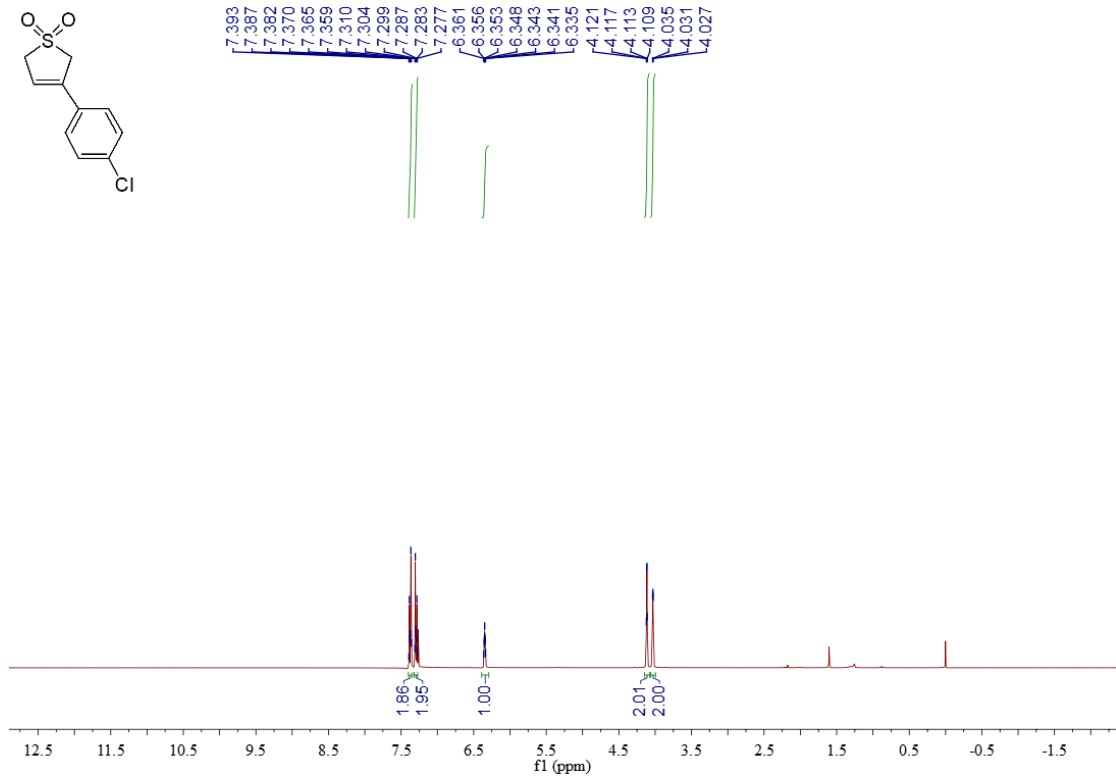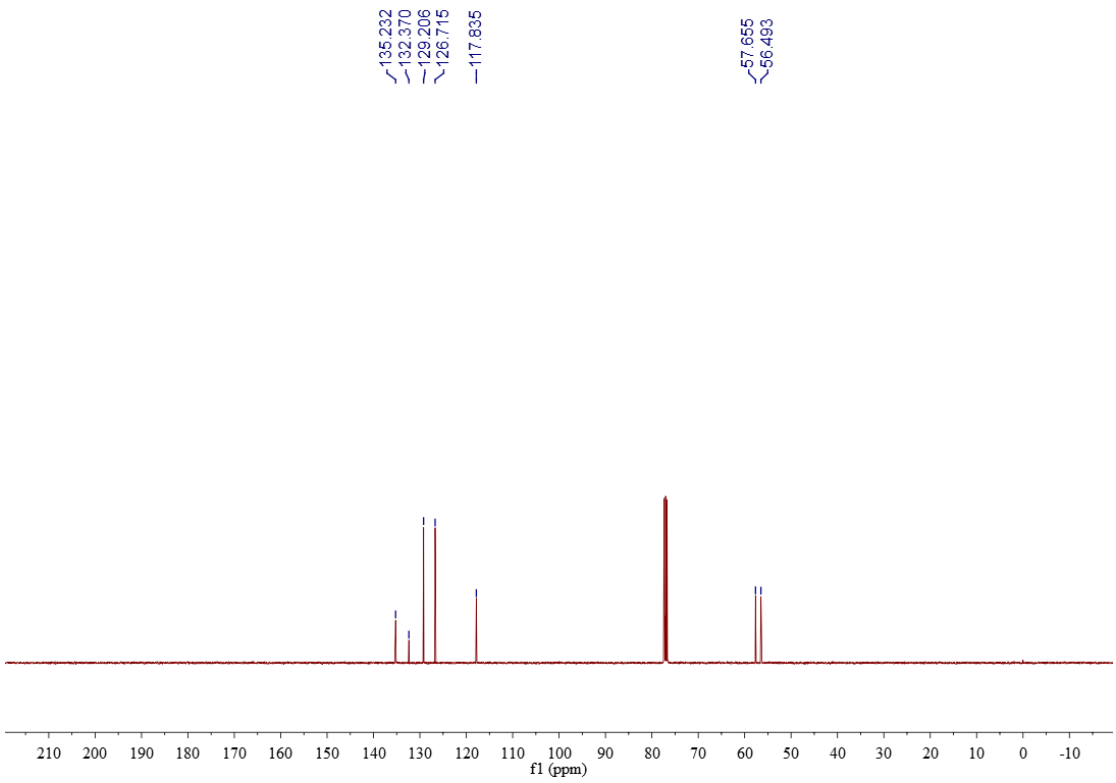

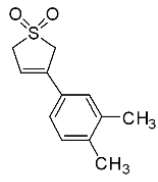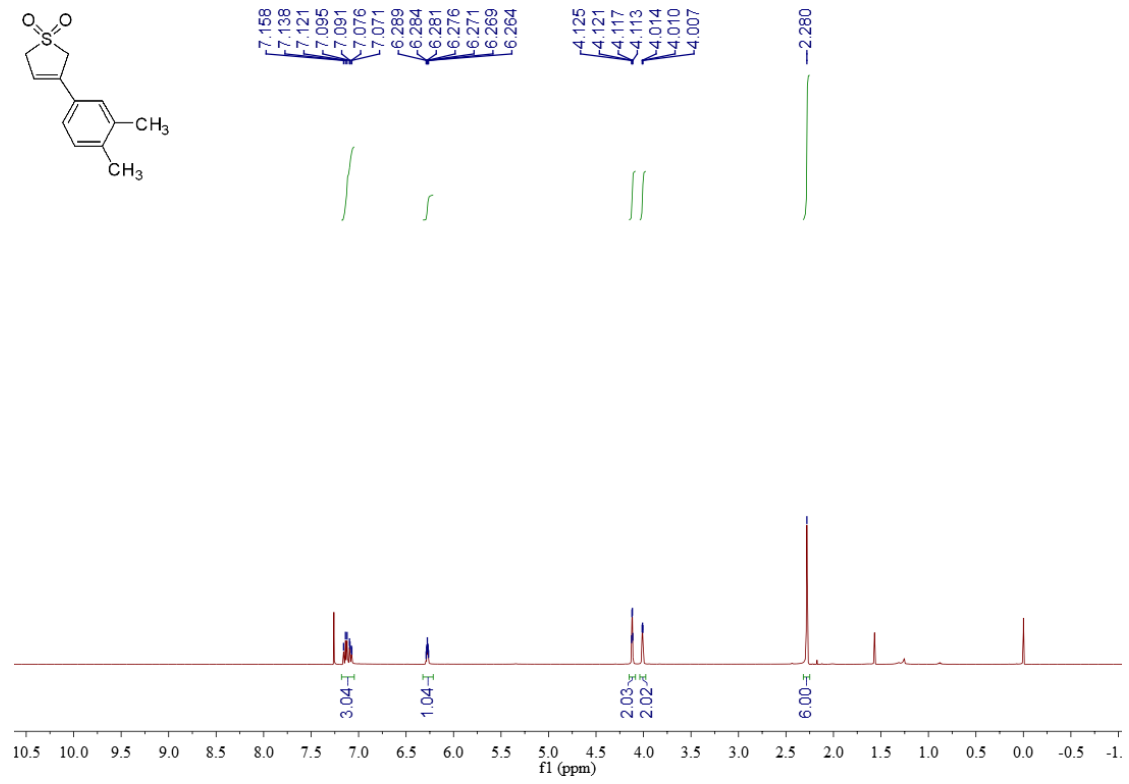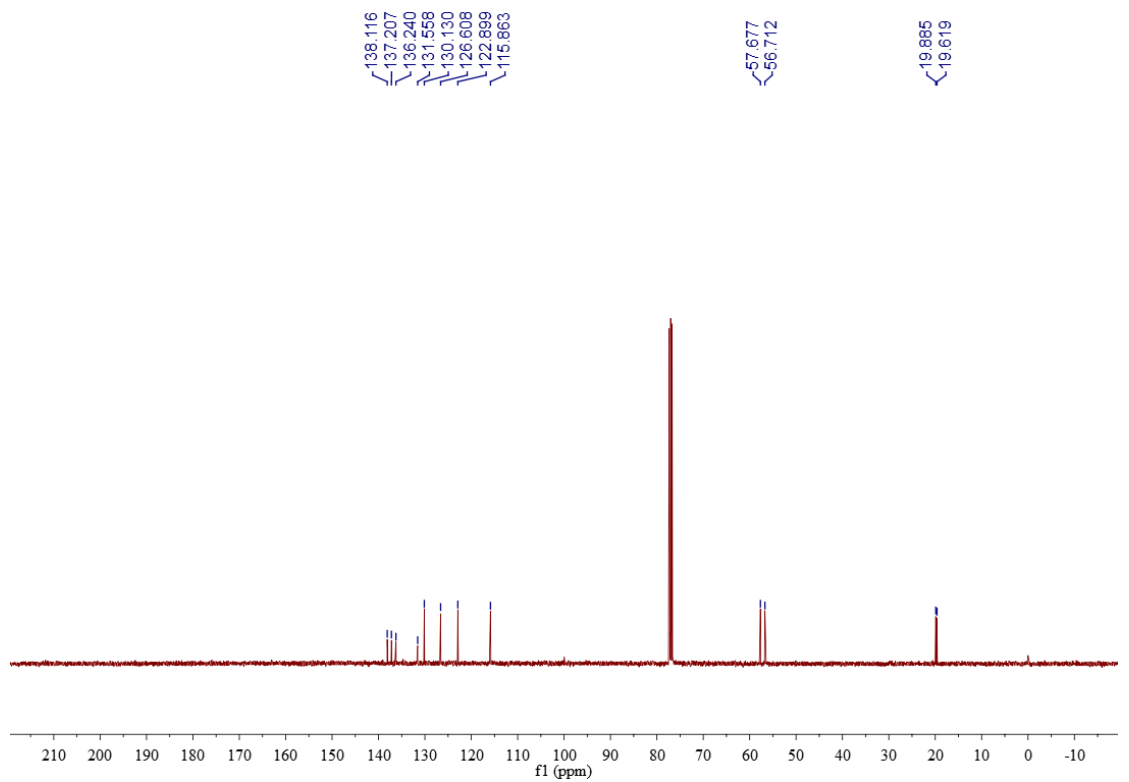

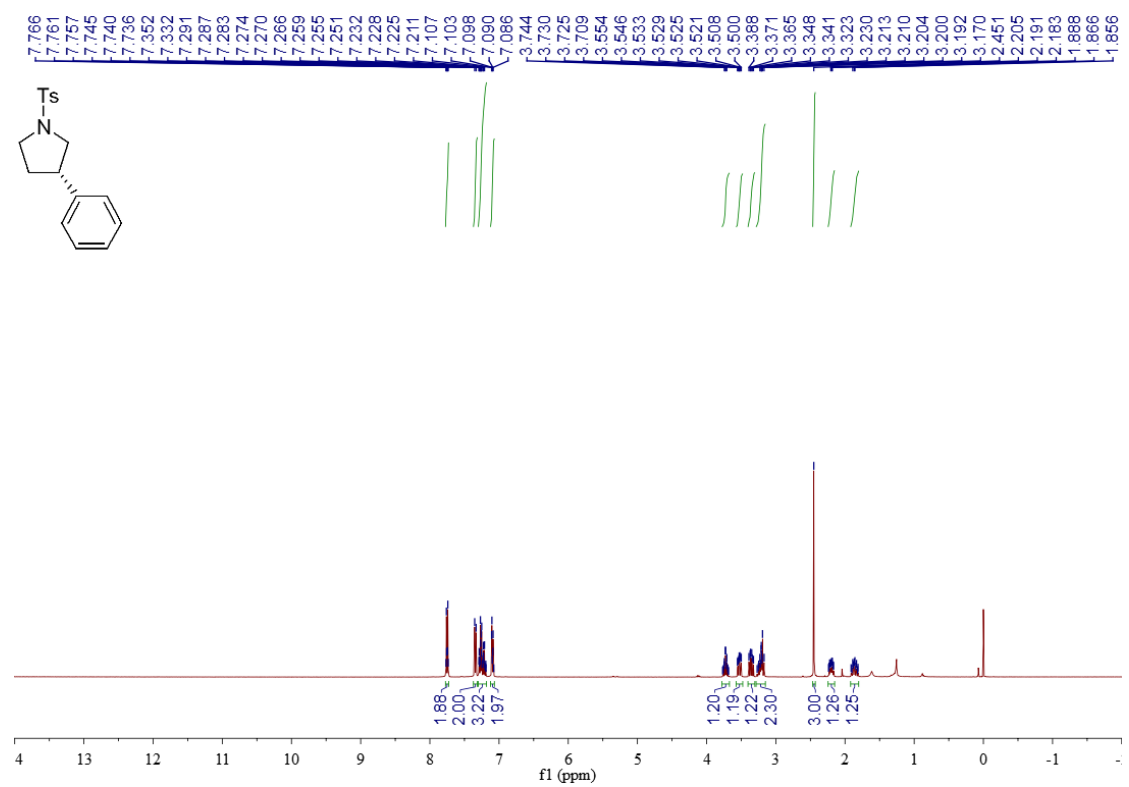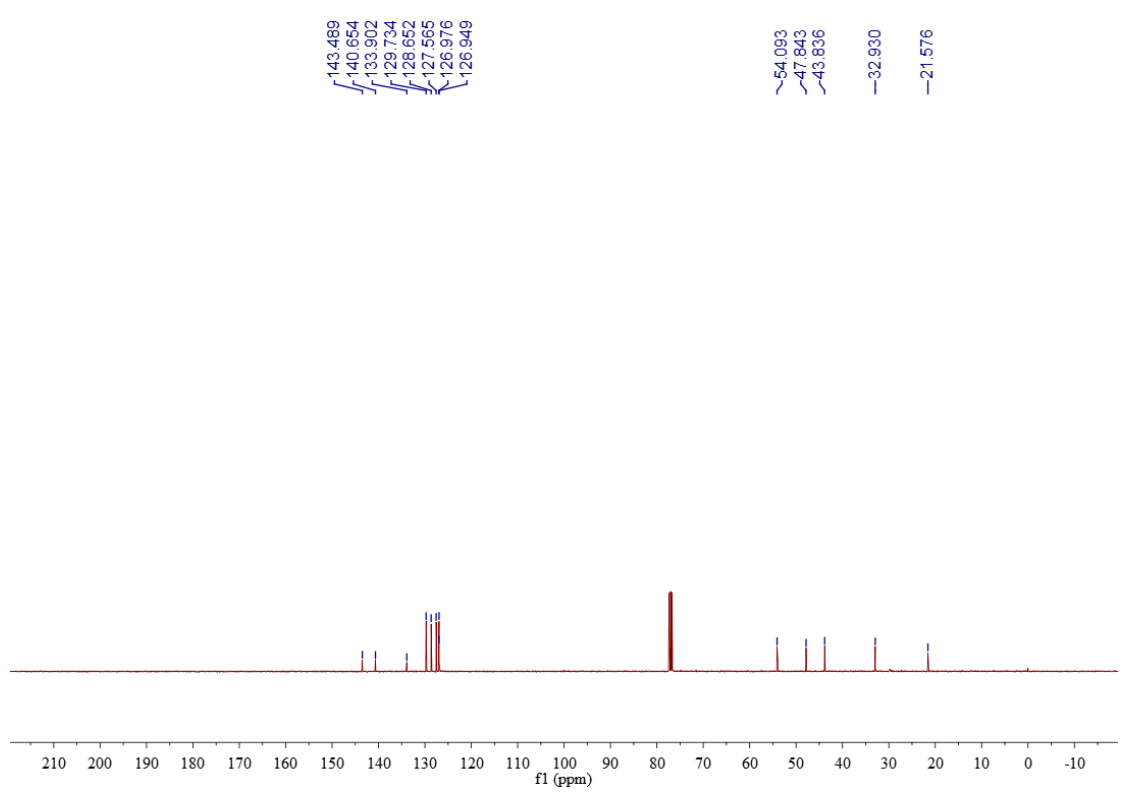

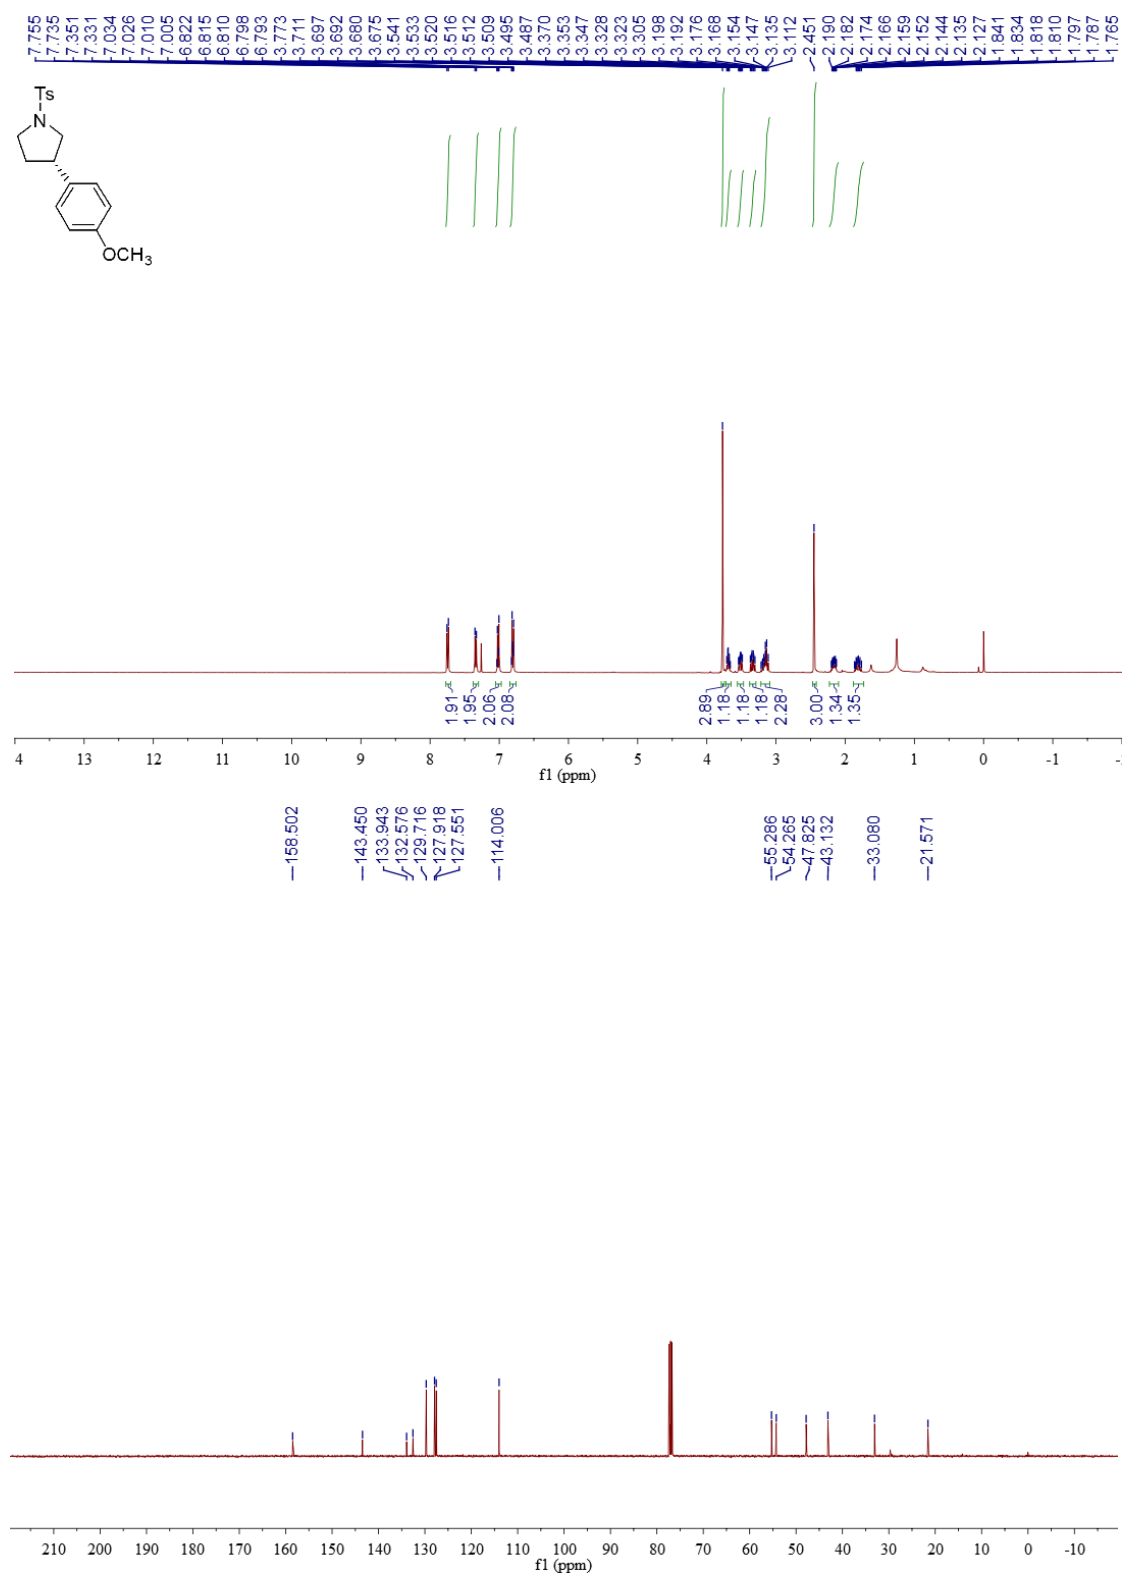

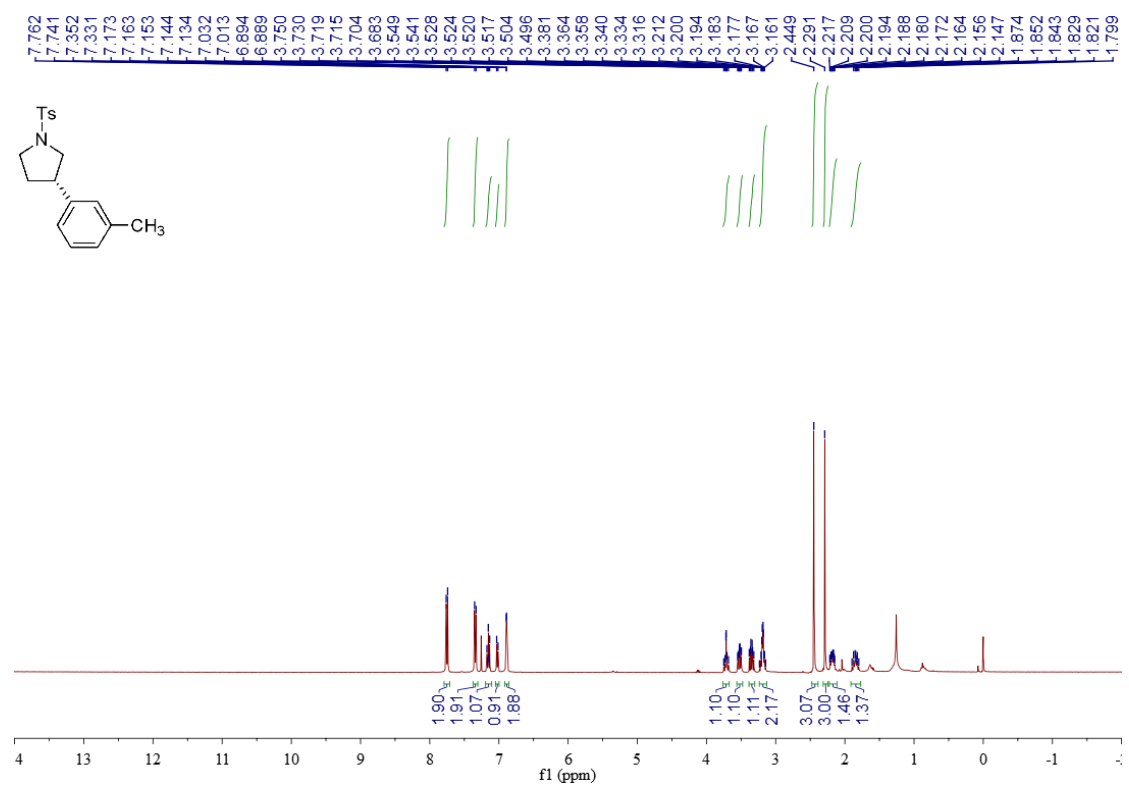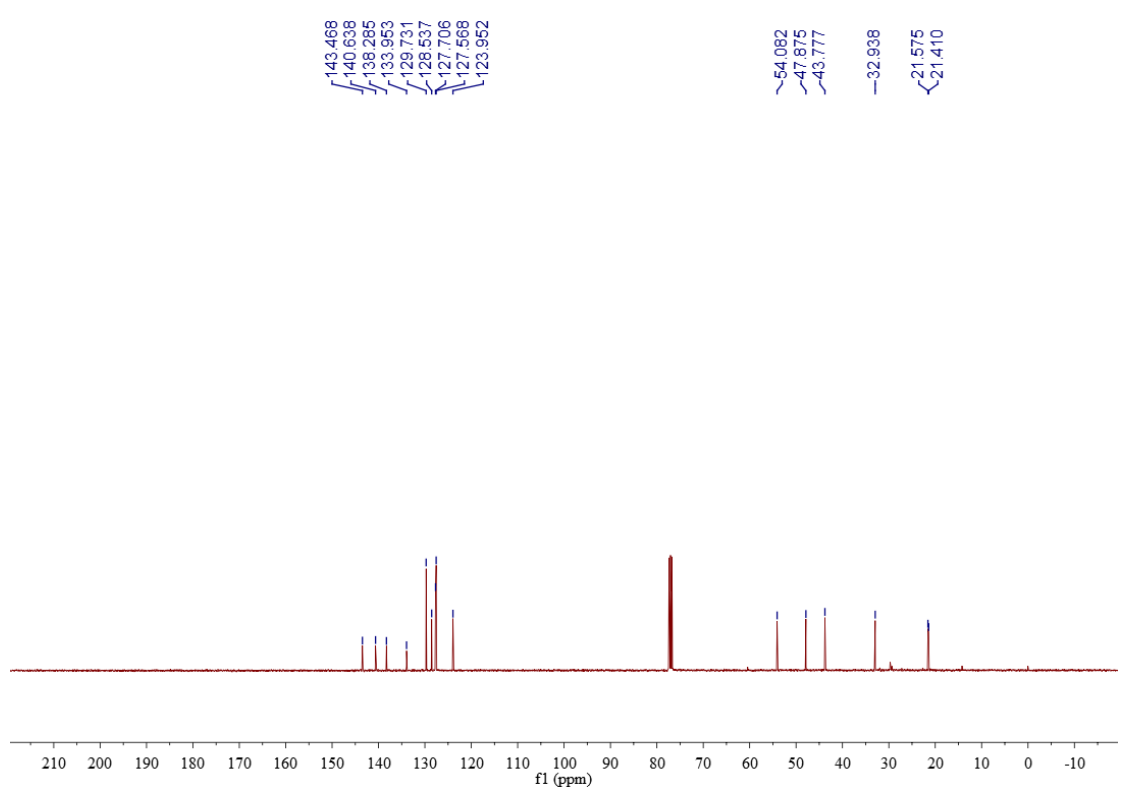

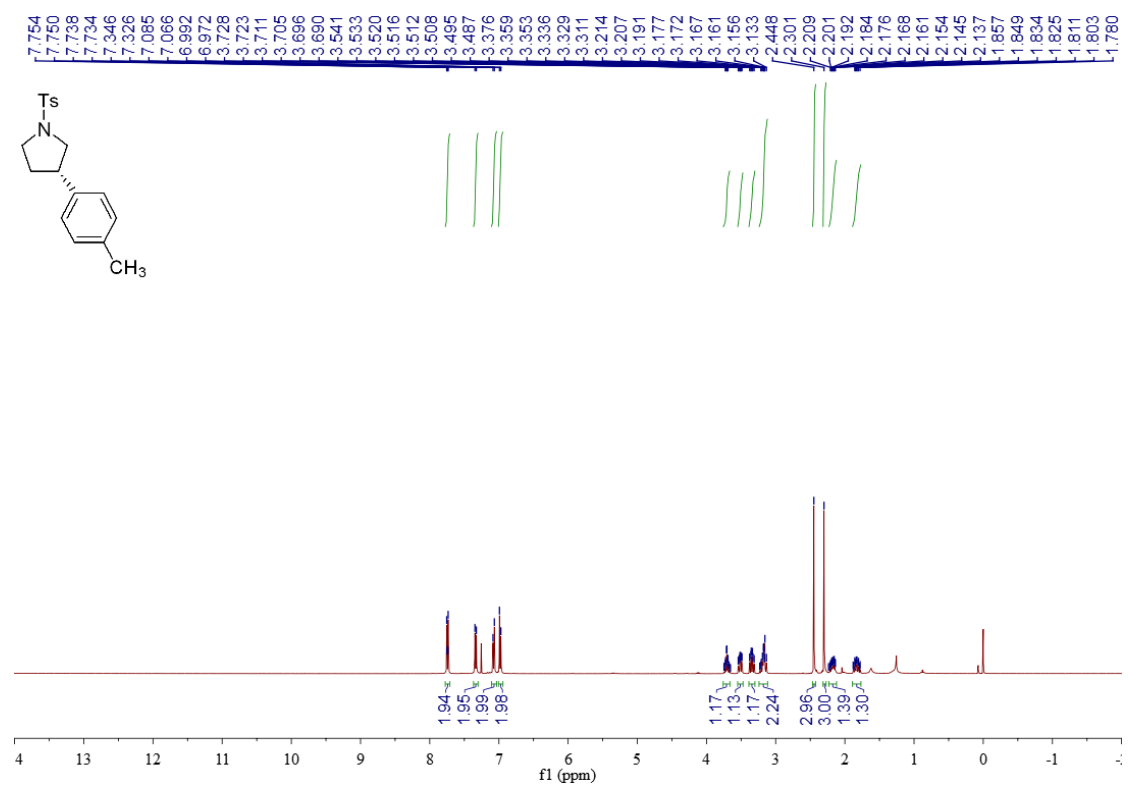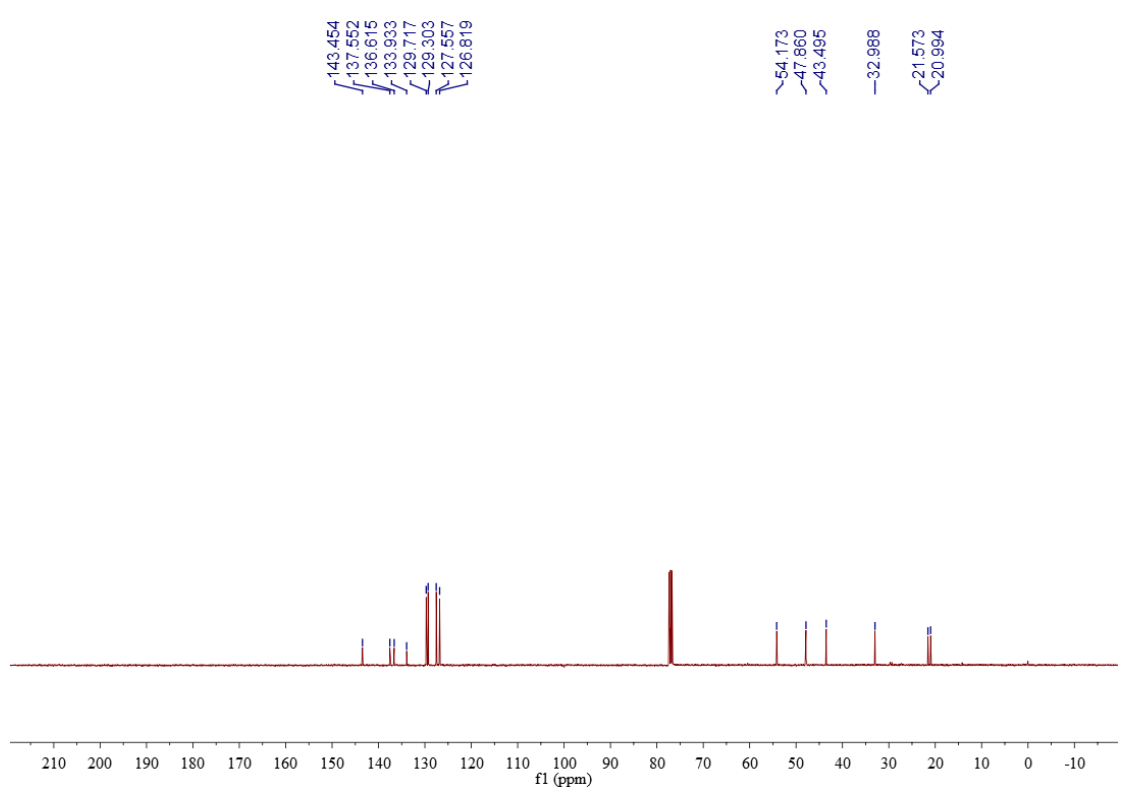

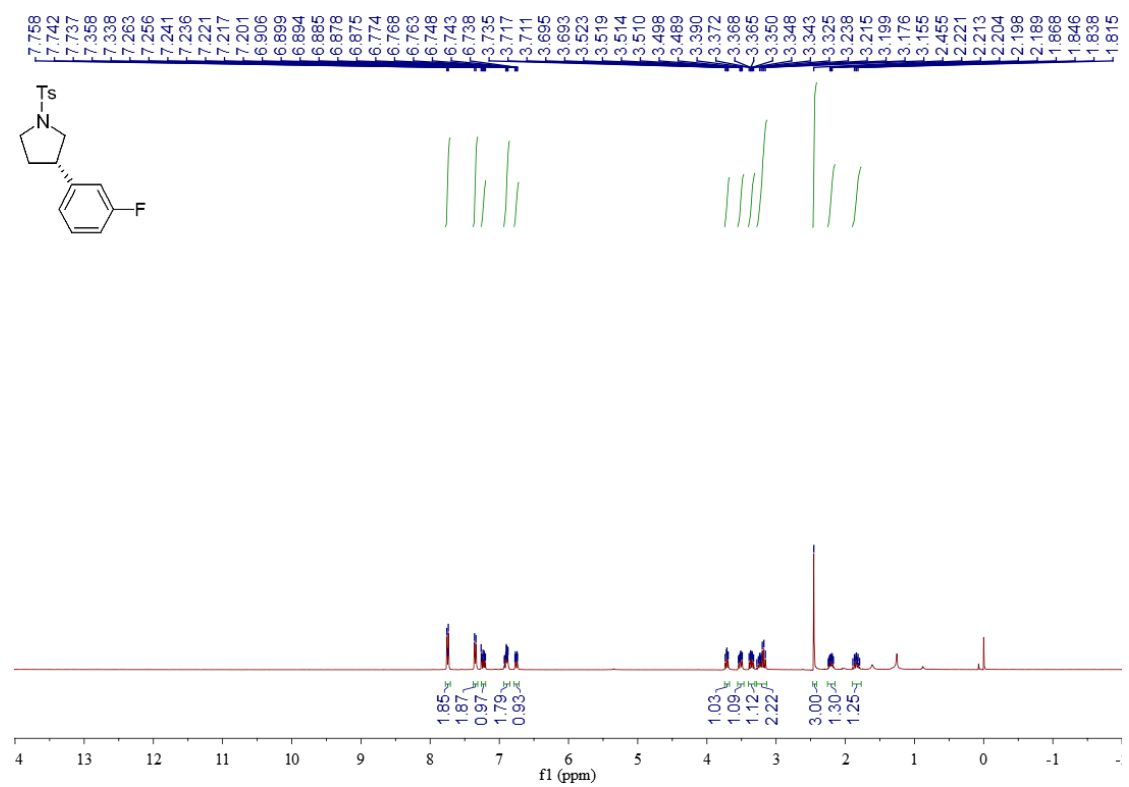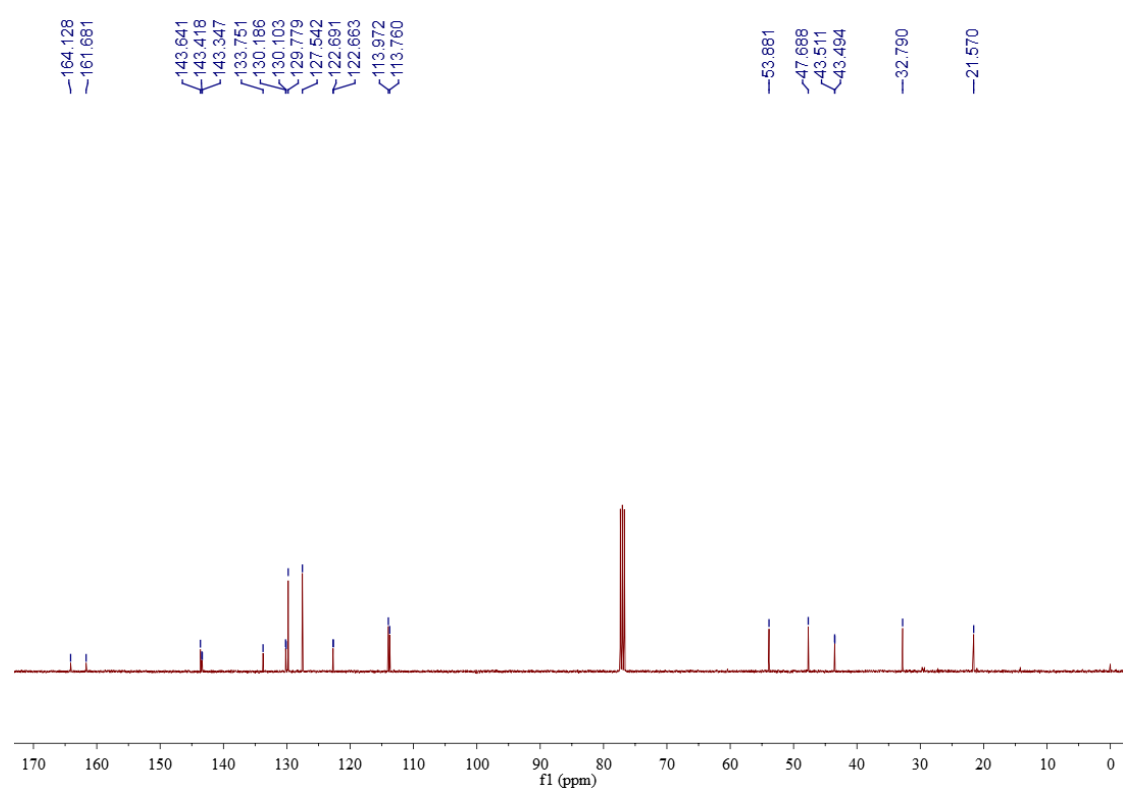



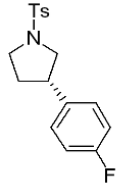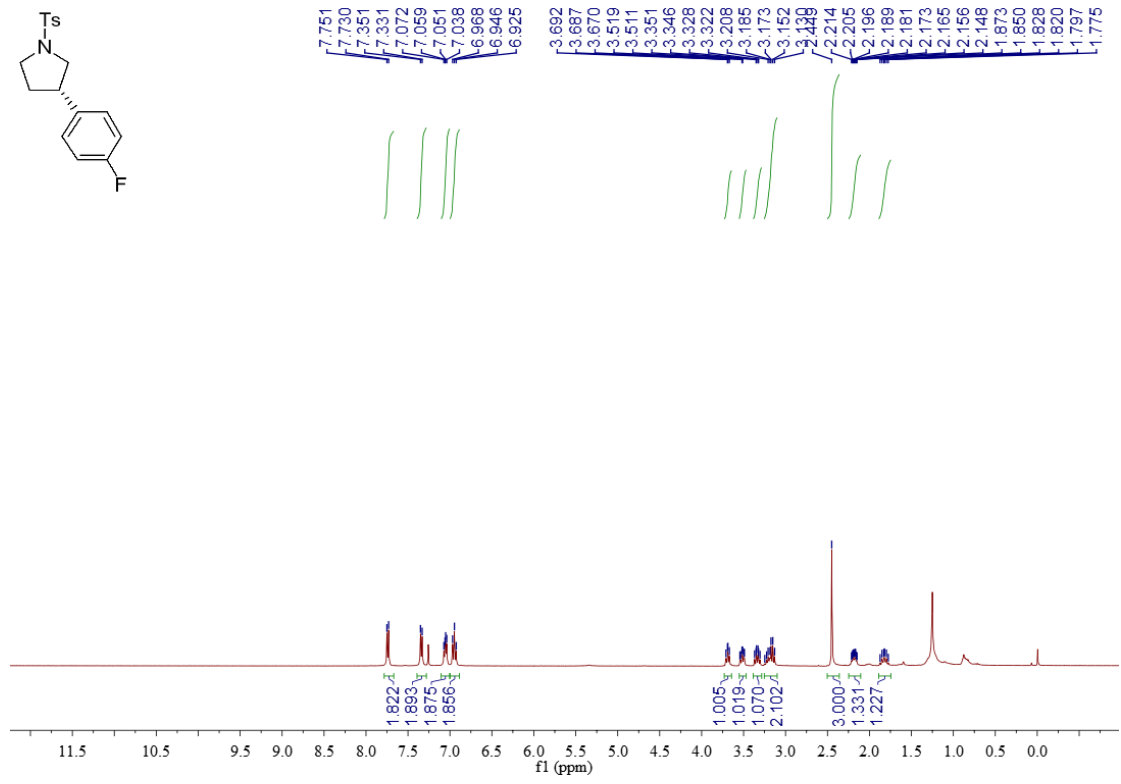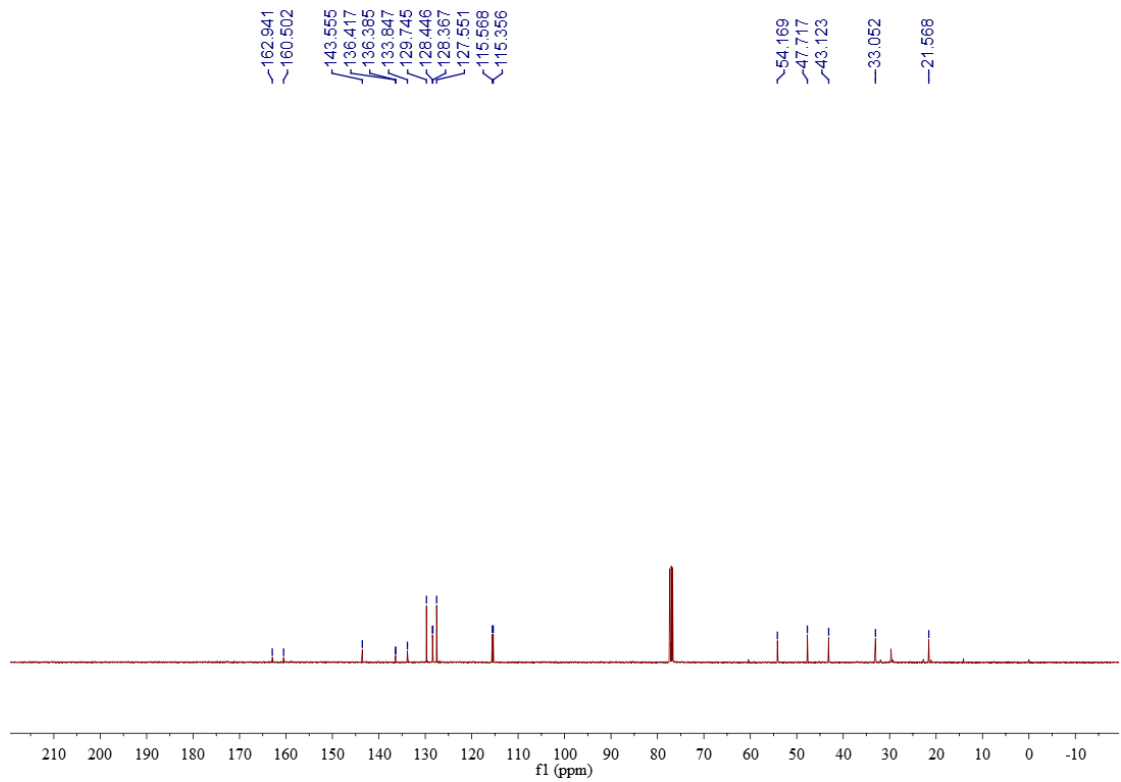

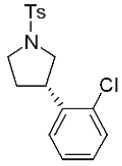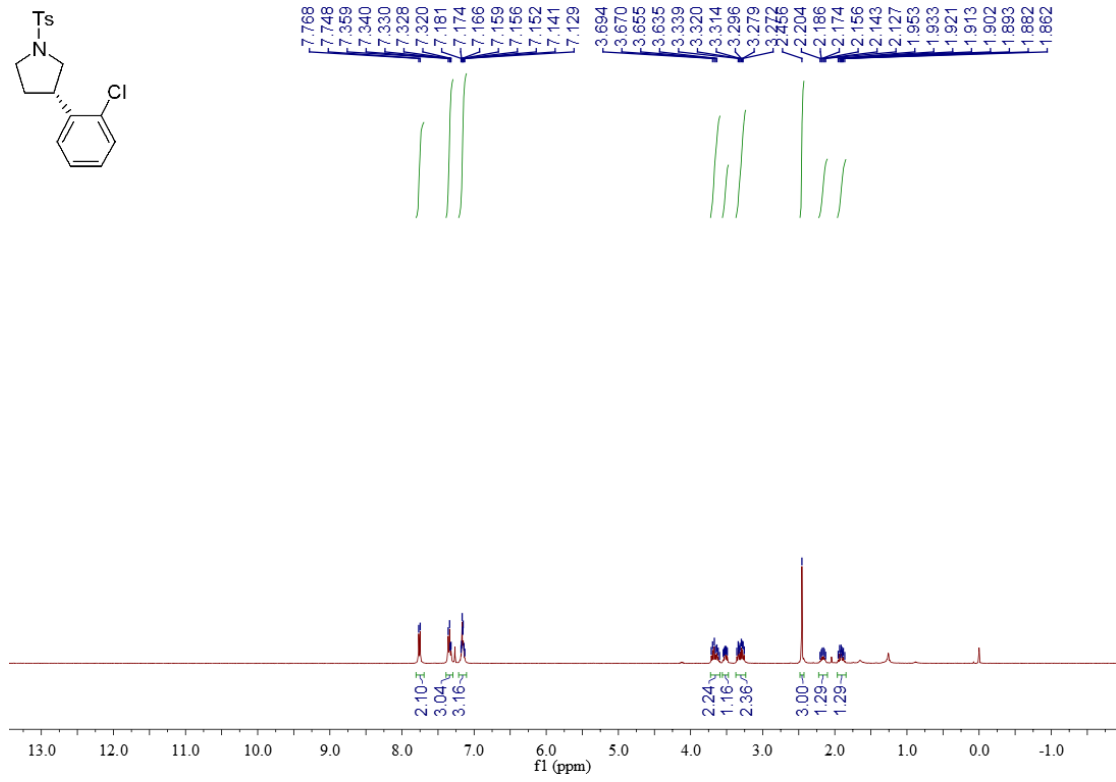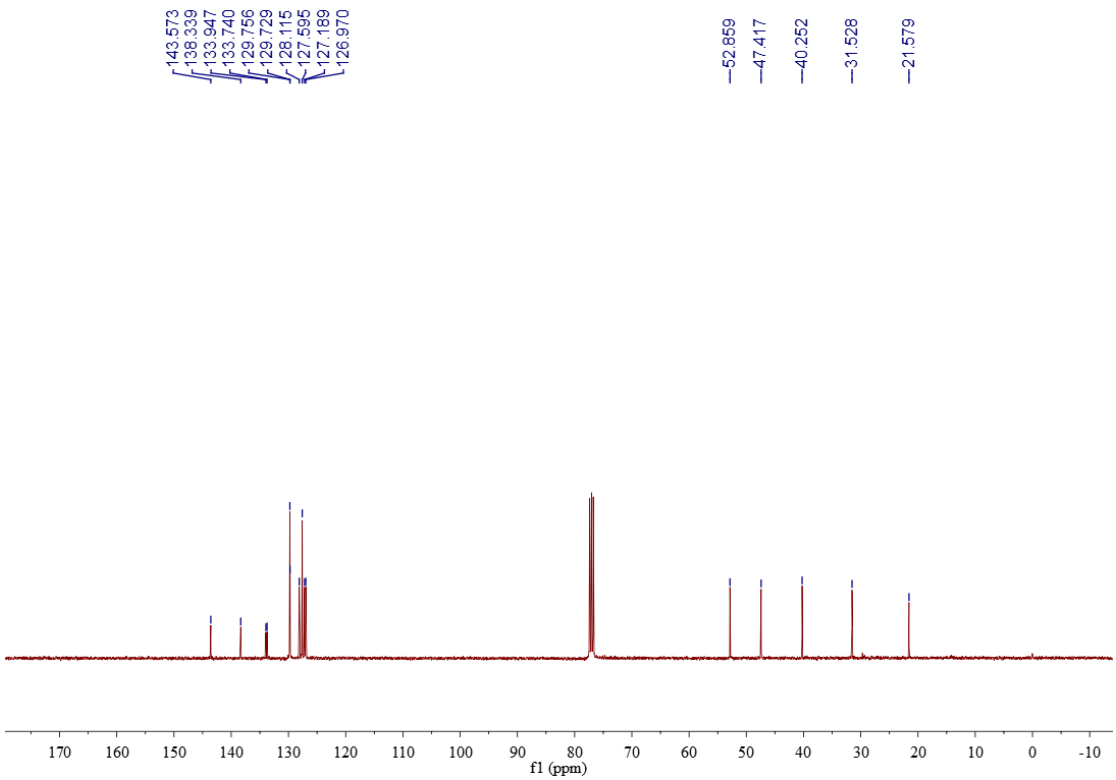

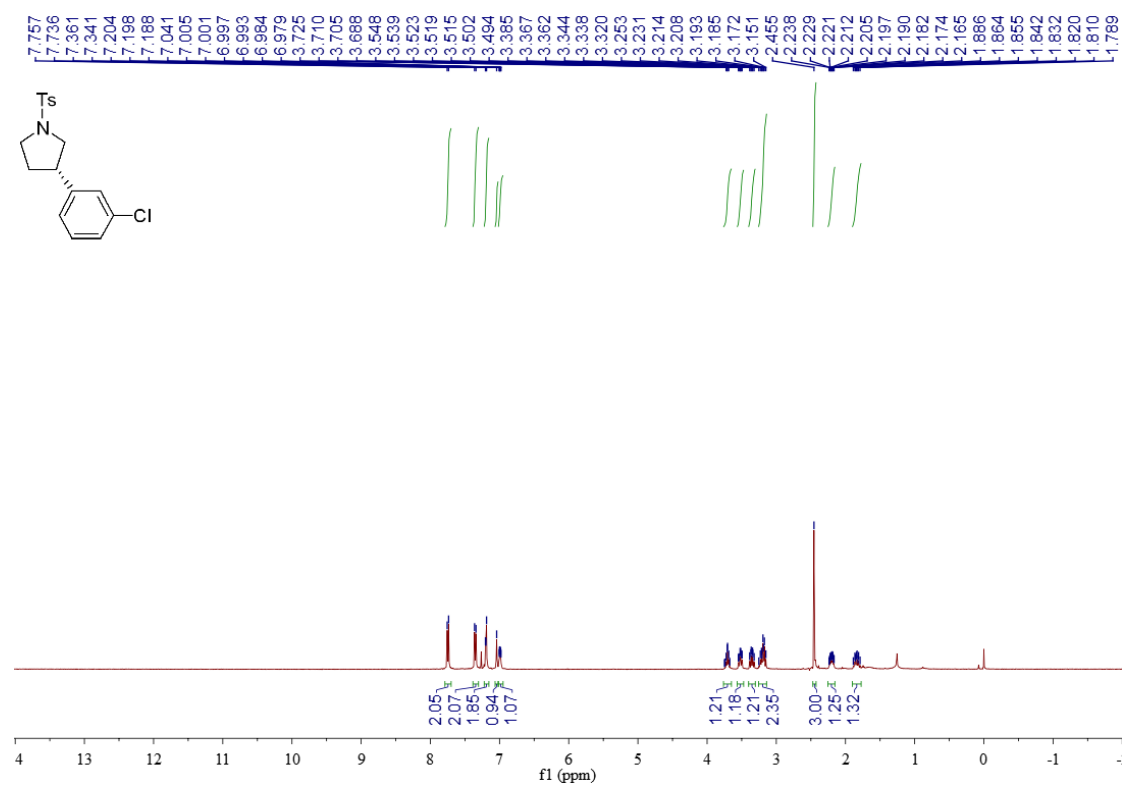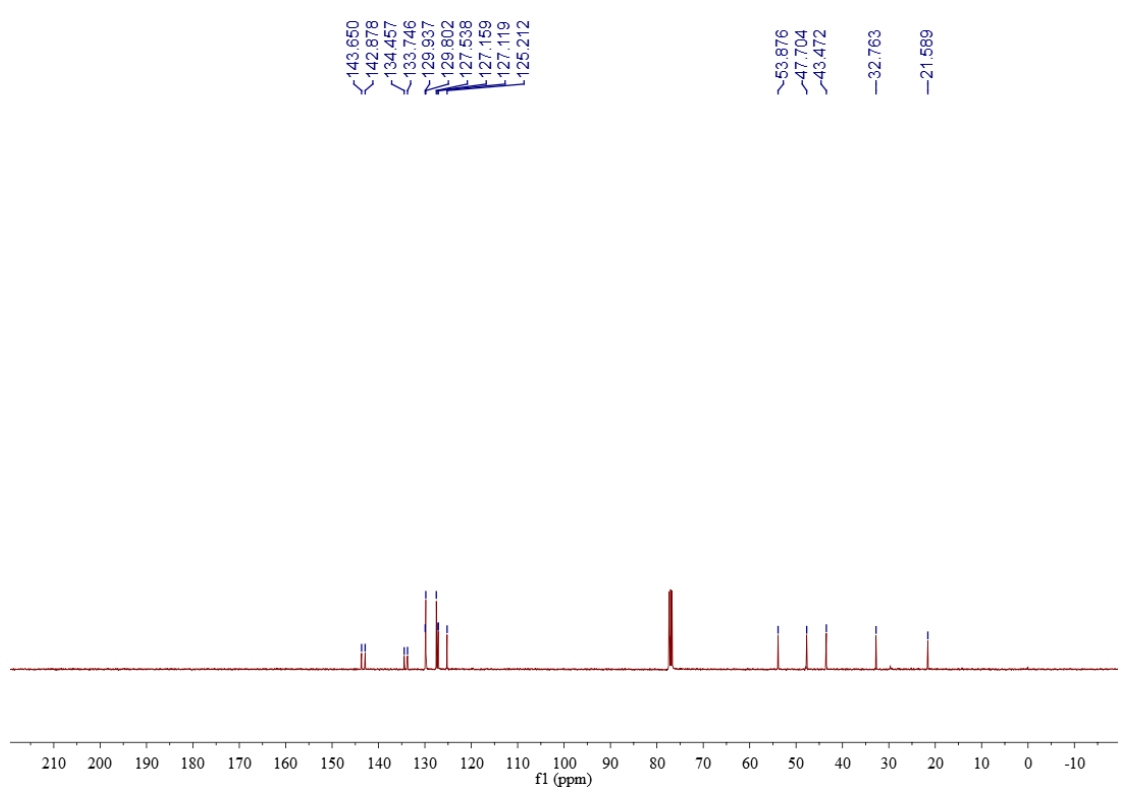

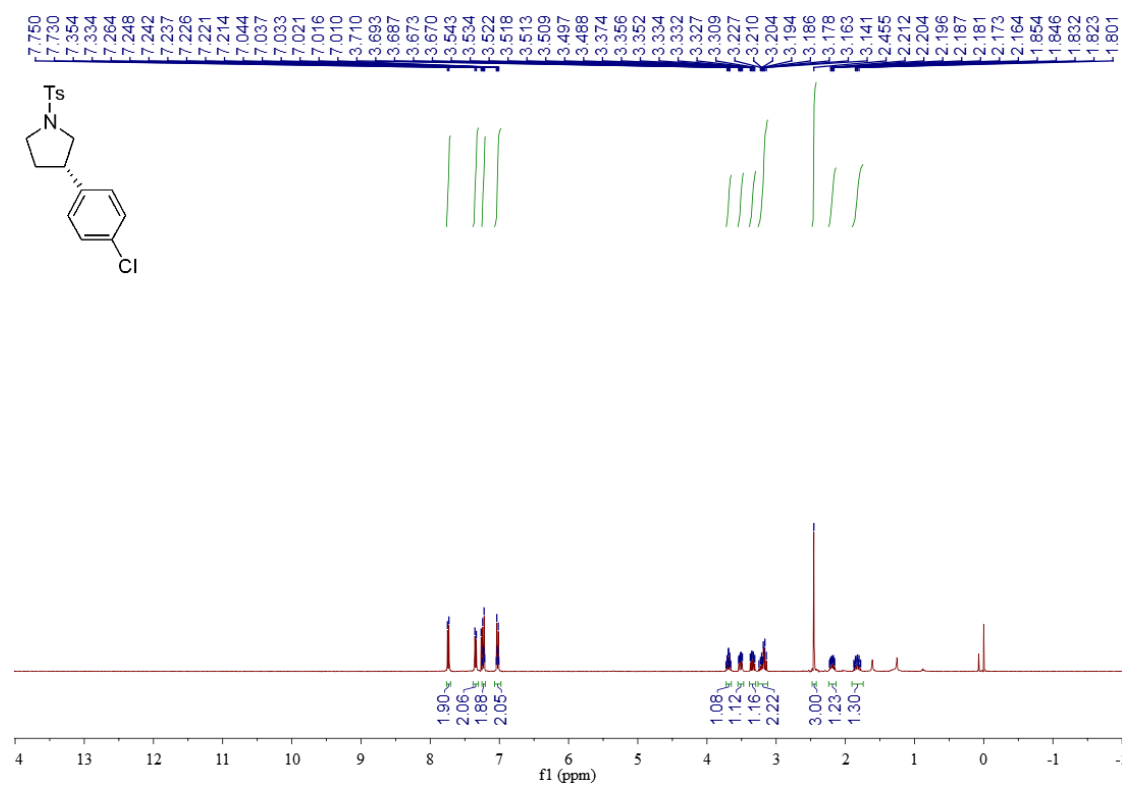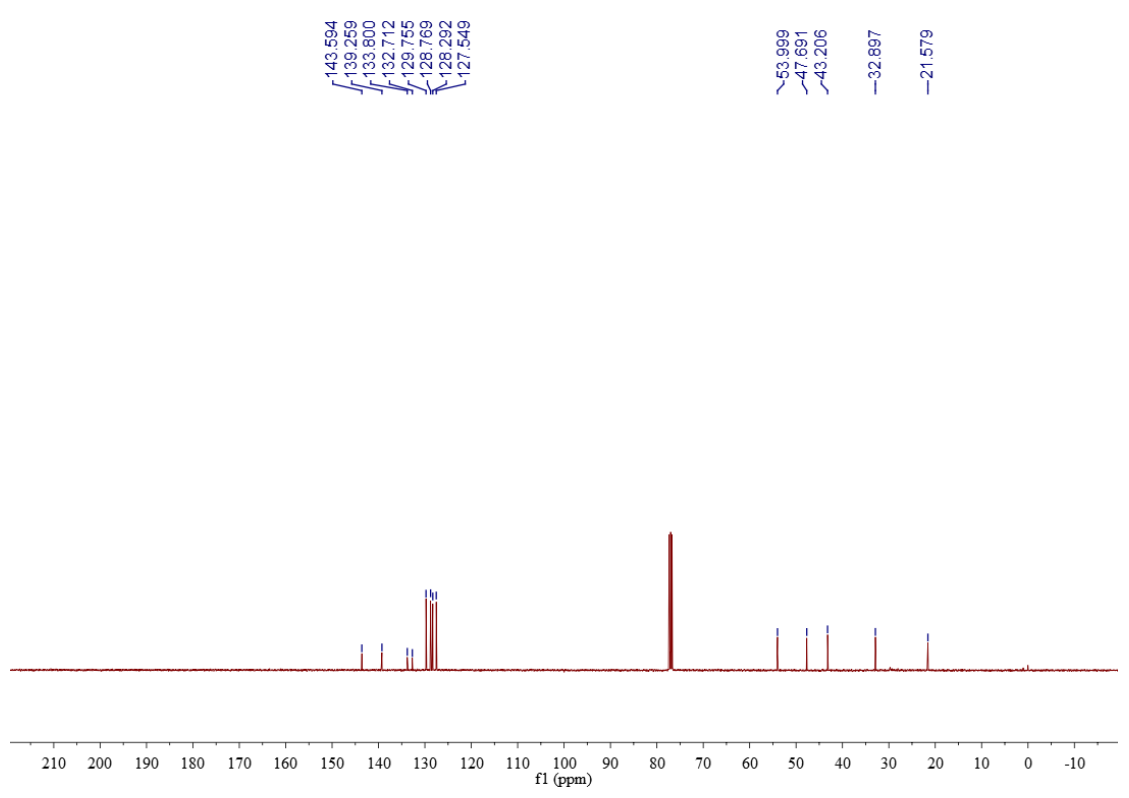

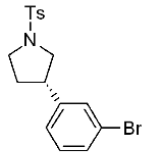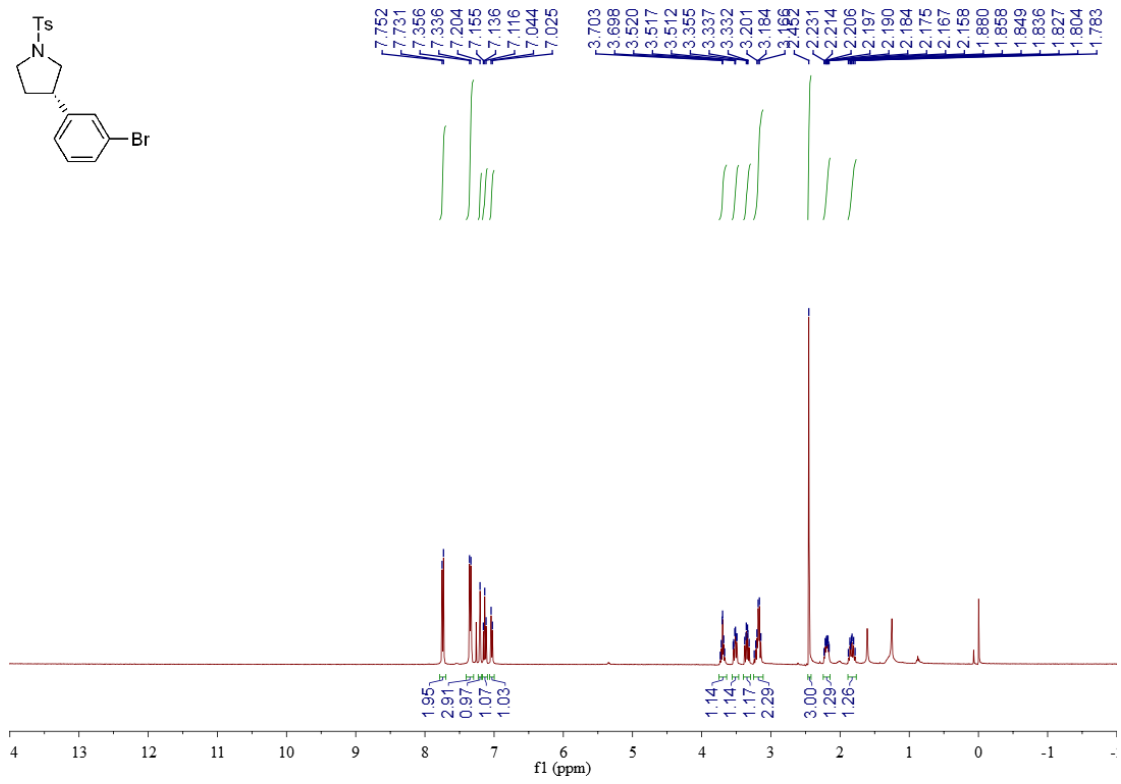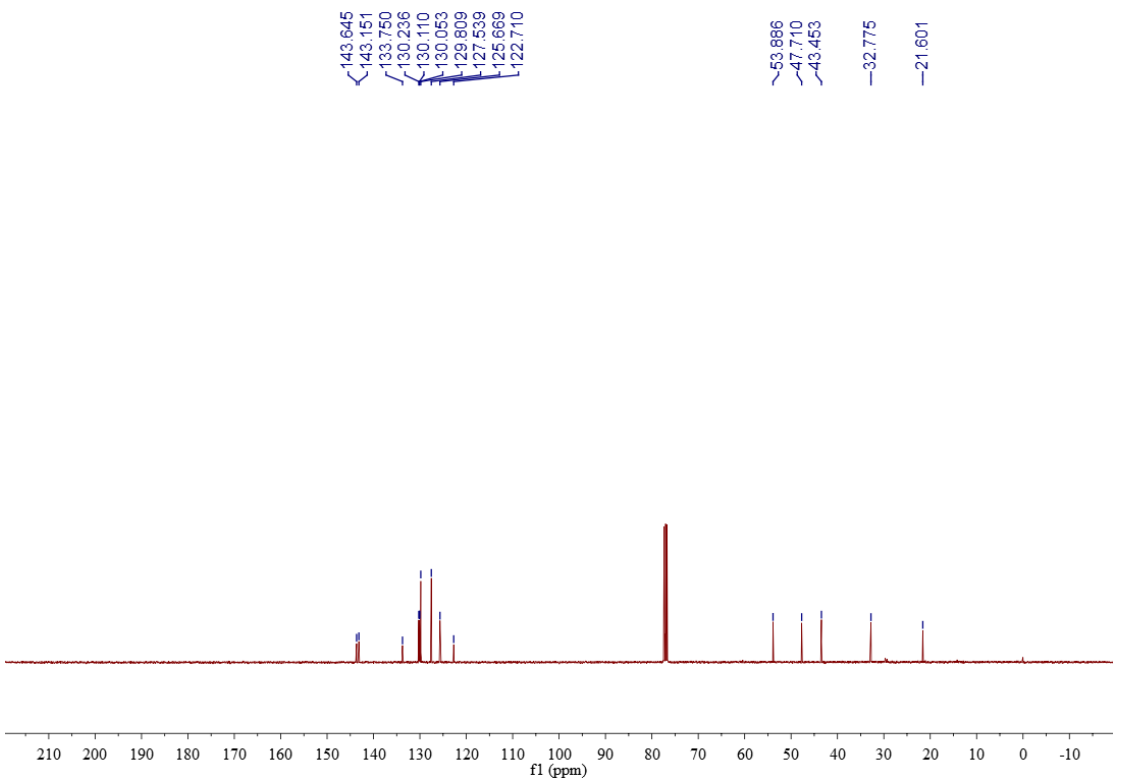

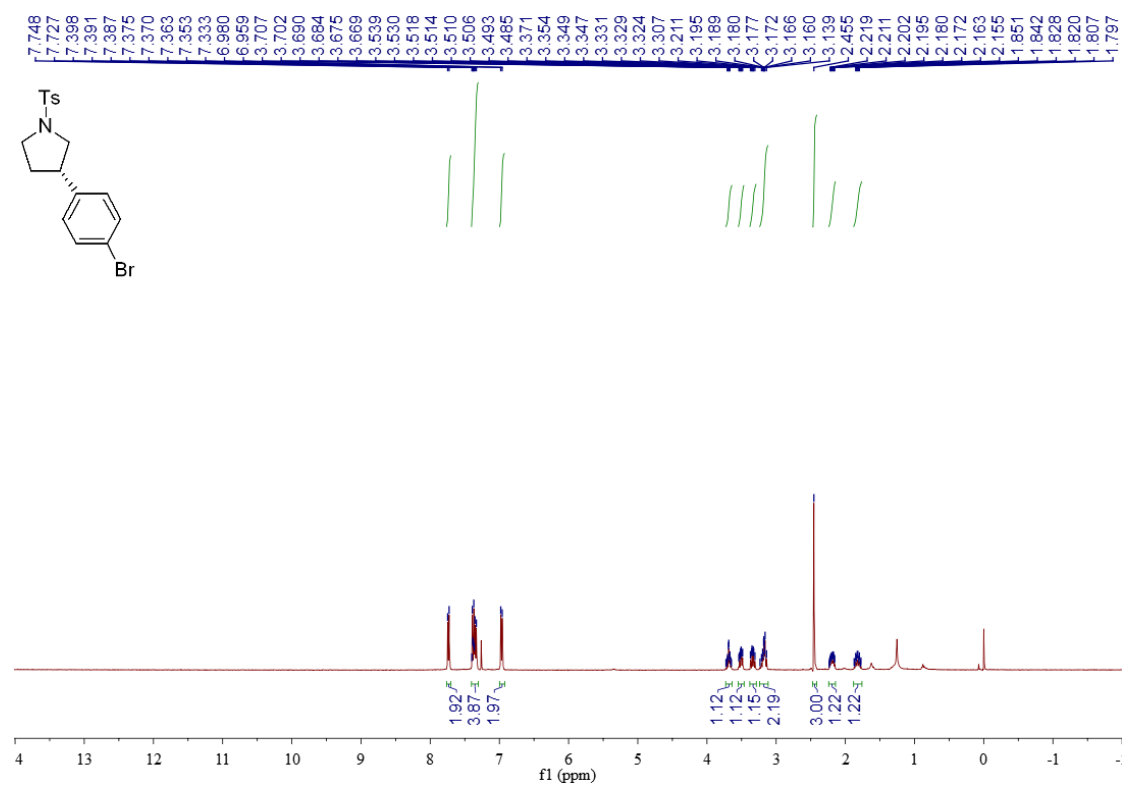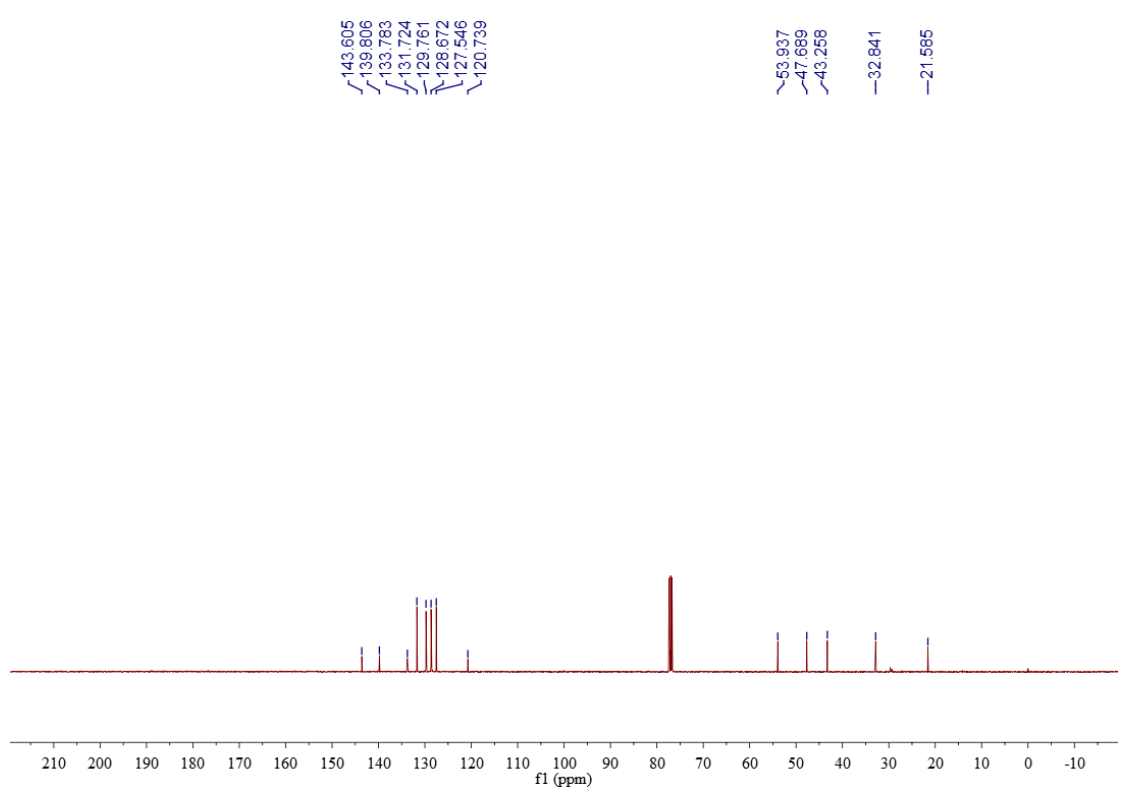

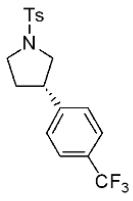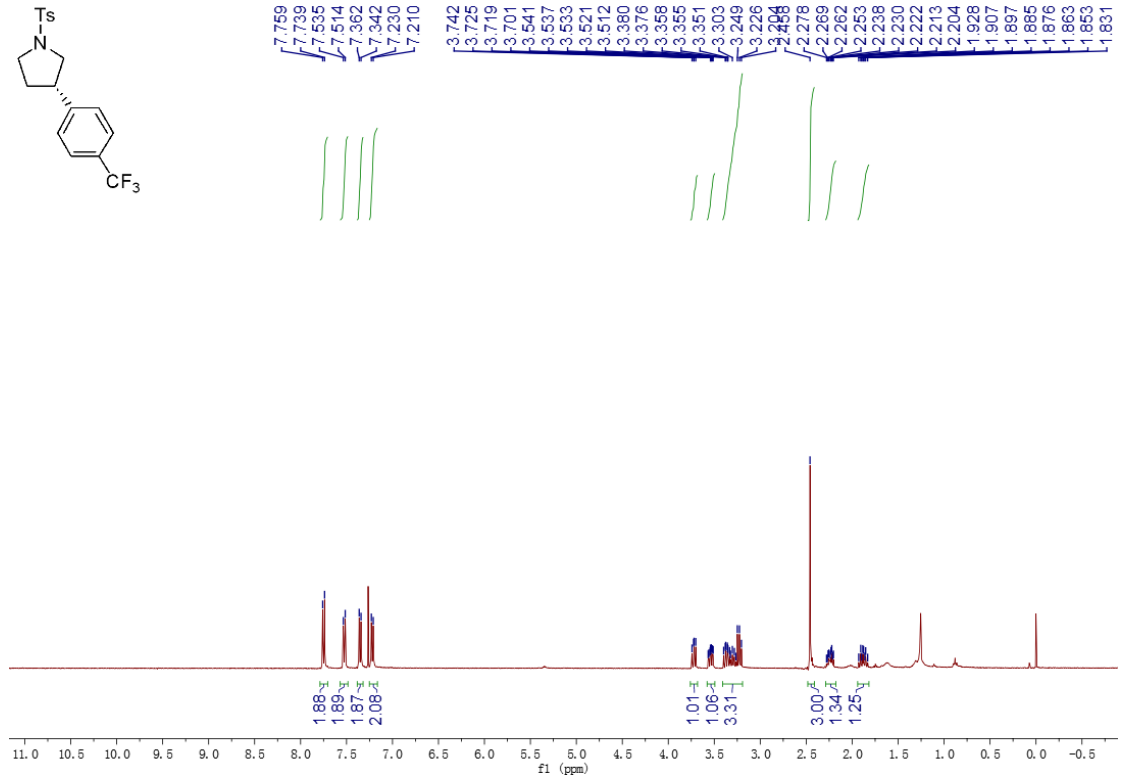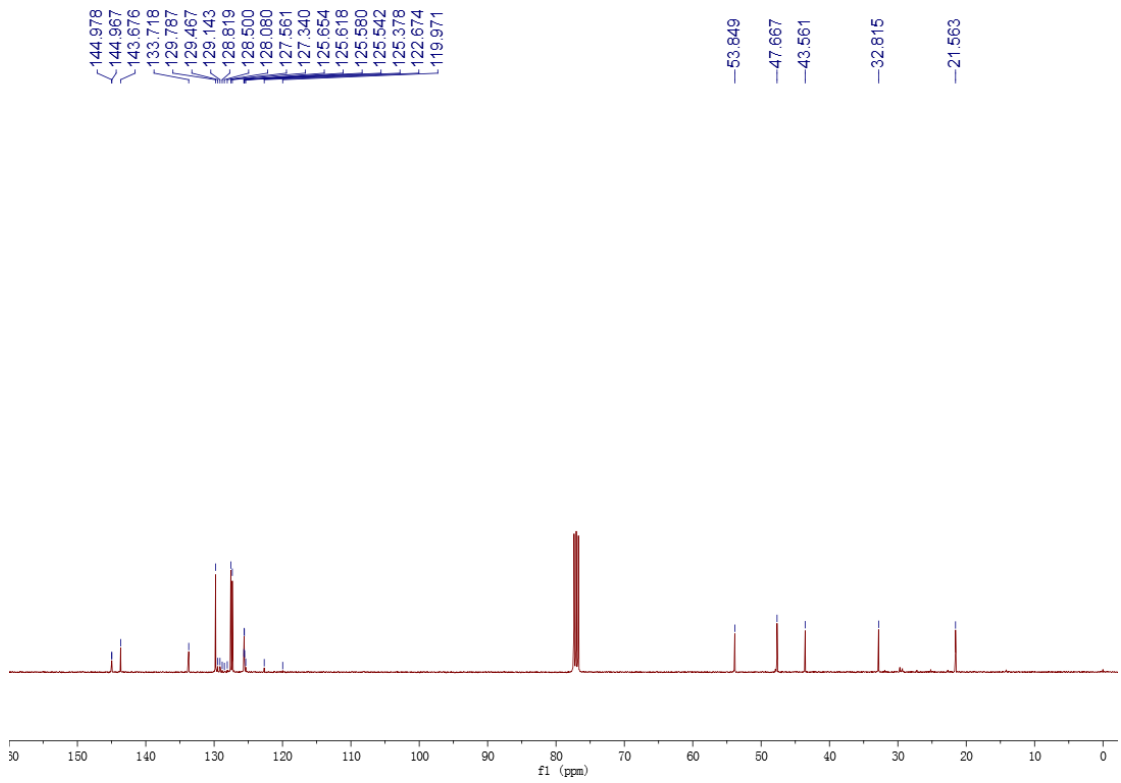

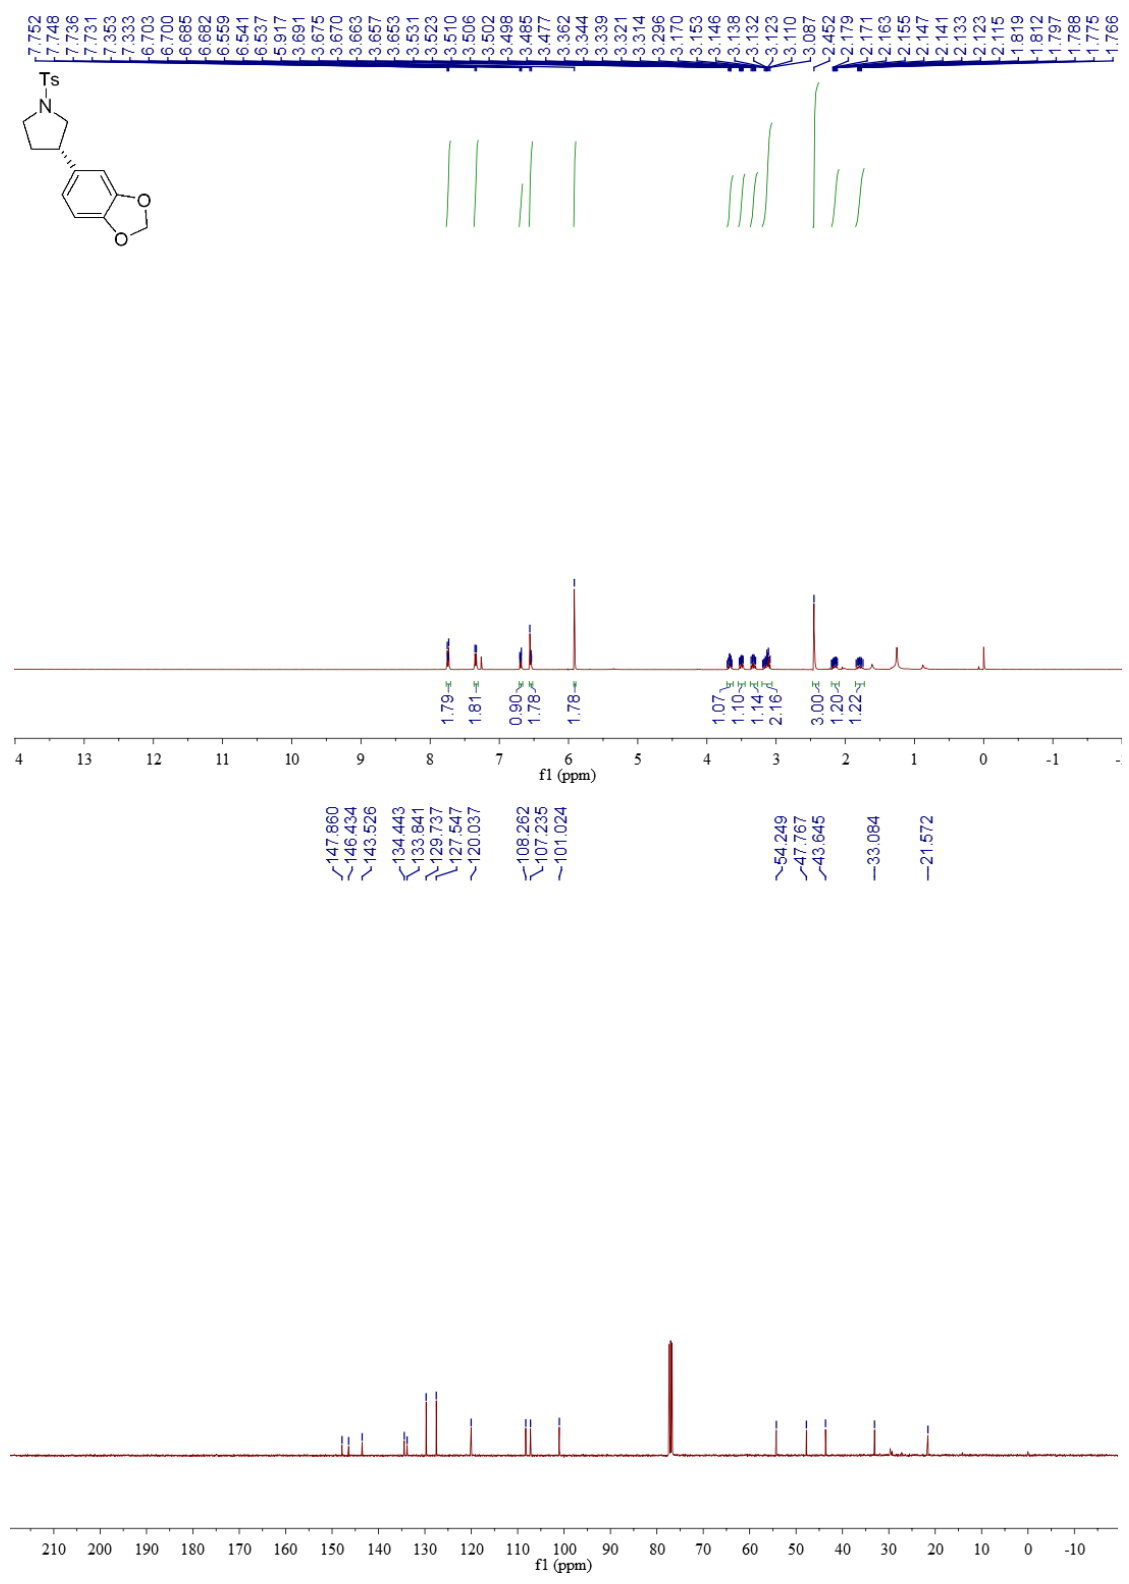



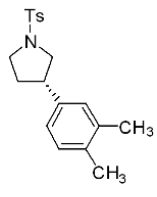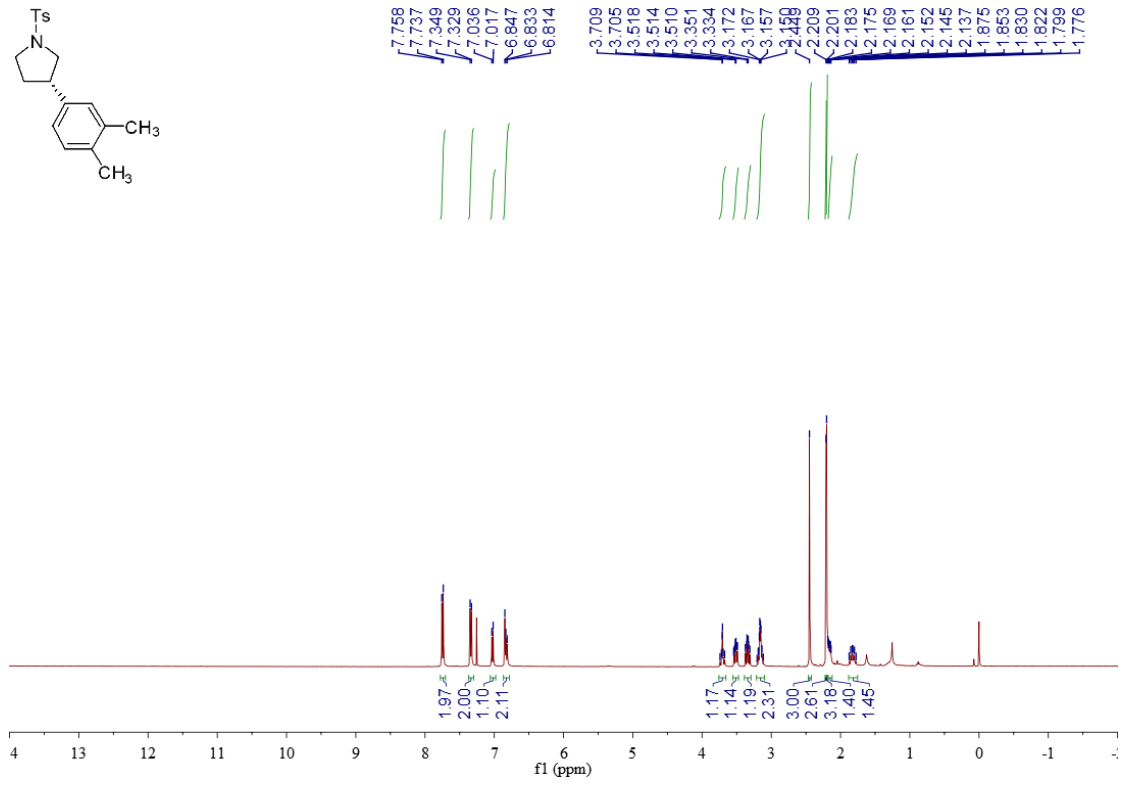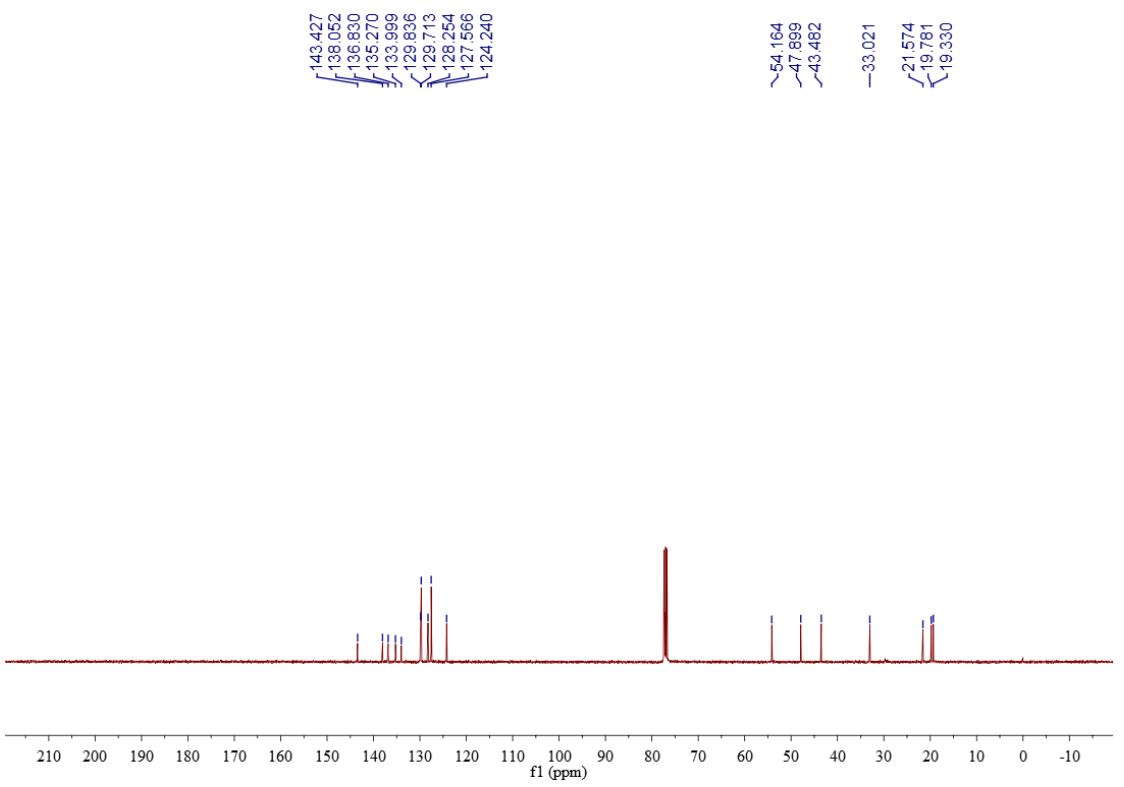

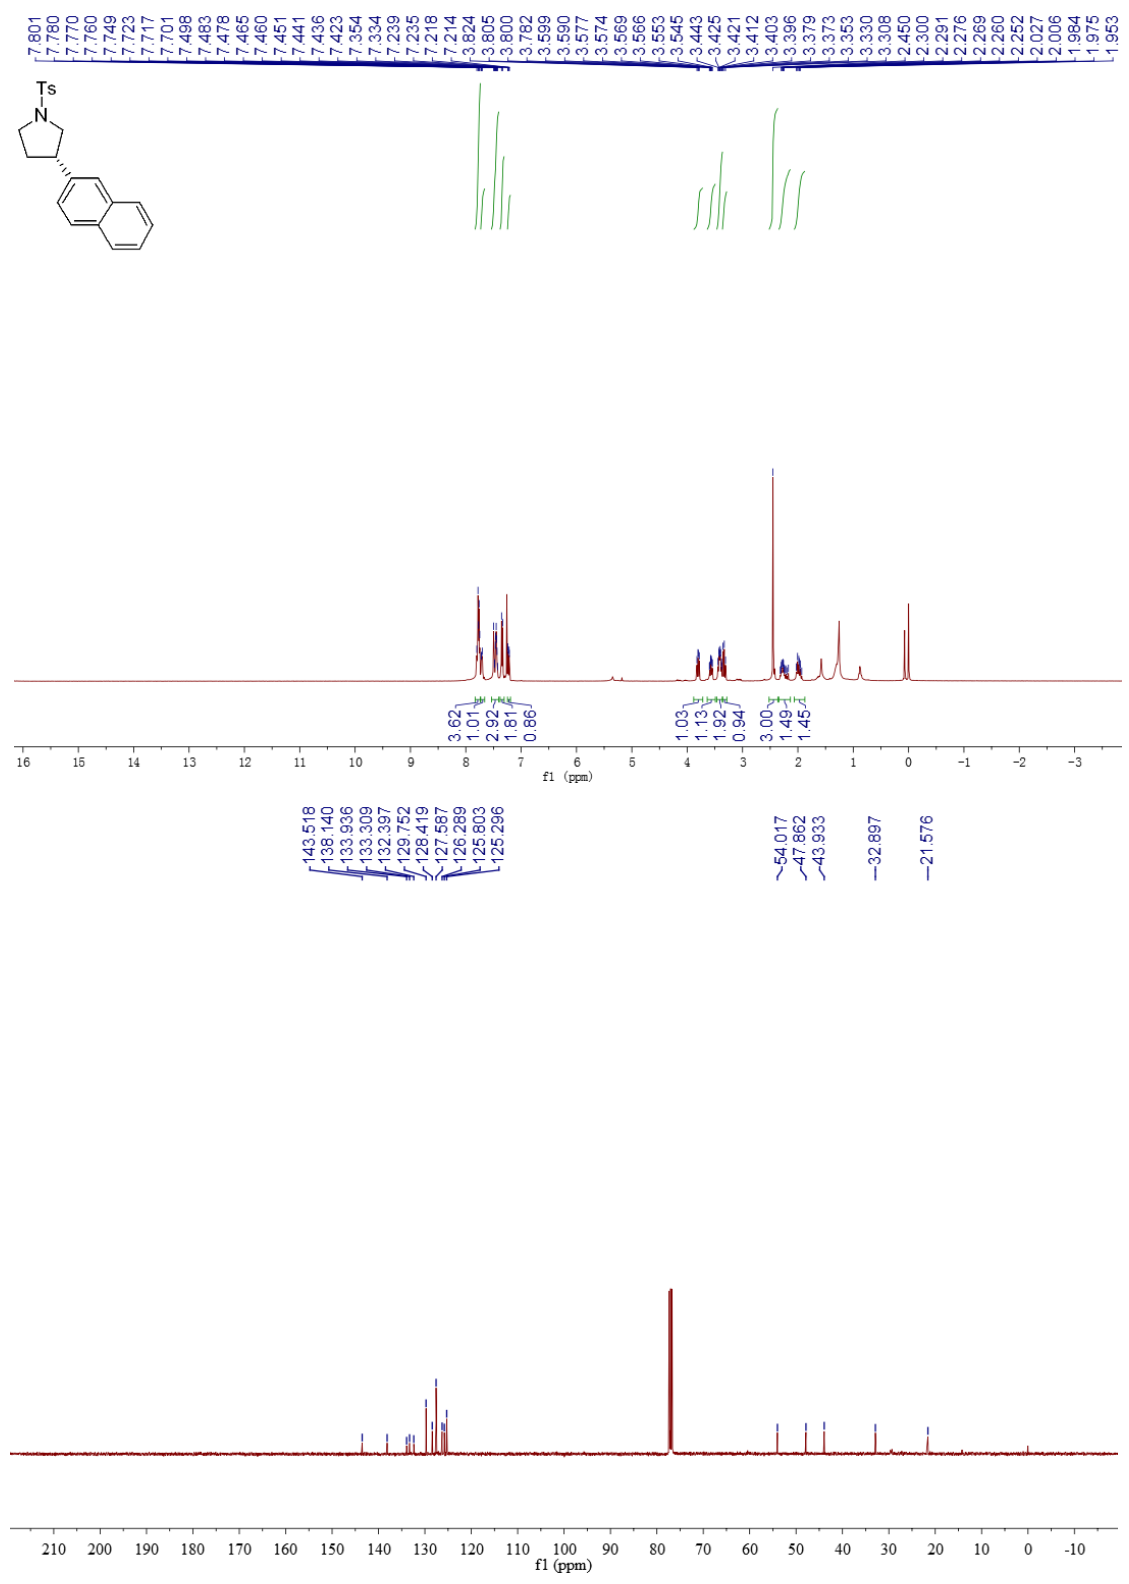

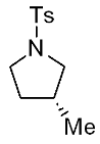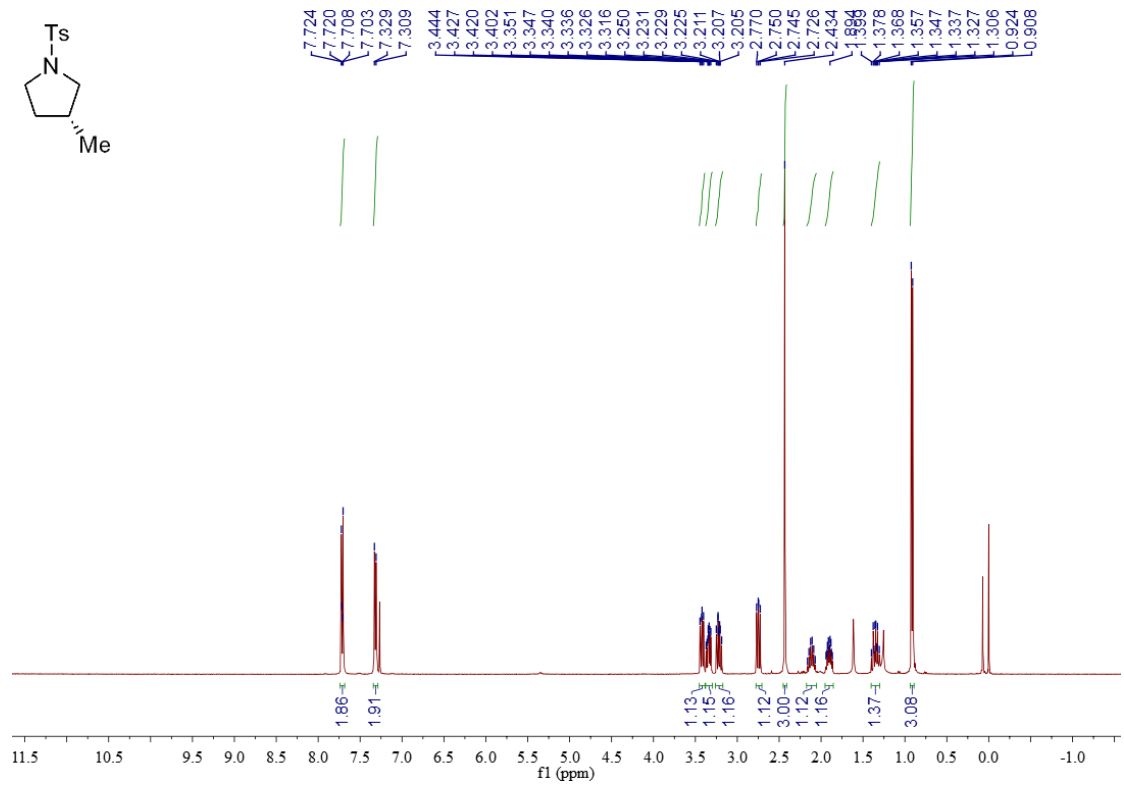

143.237  
133.983  
129.584  
127.505

54.756  
47.608  
33.301  
33.244  
21.536  
17.644

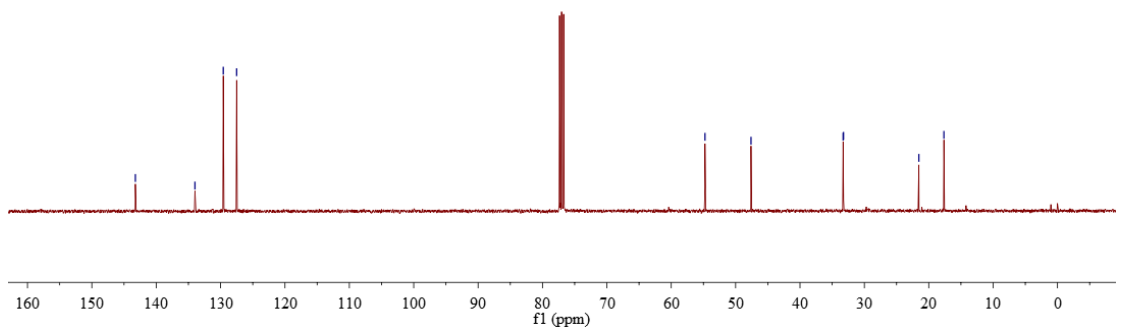

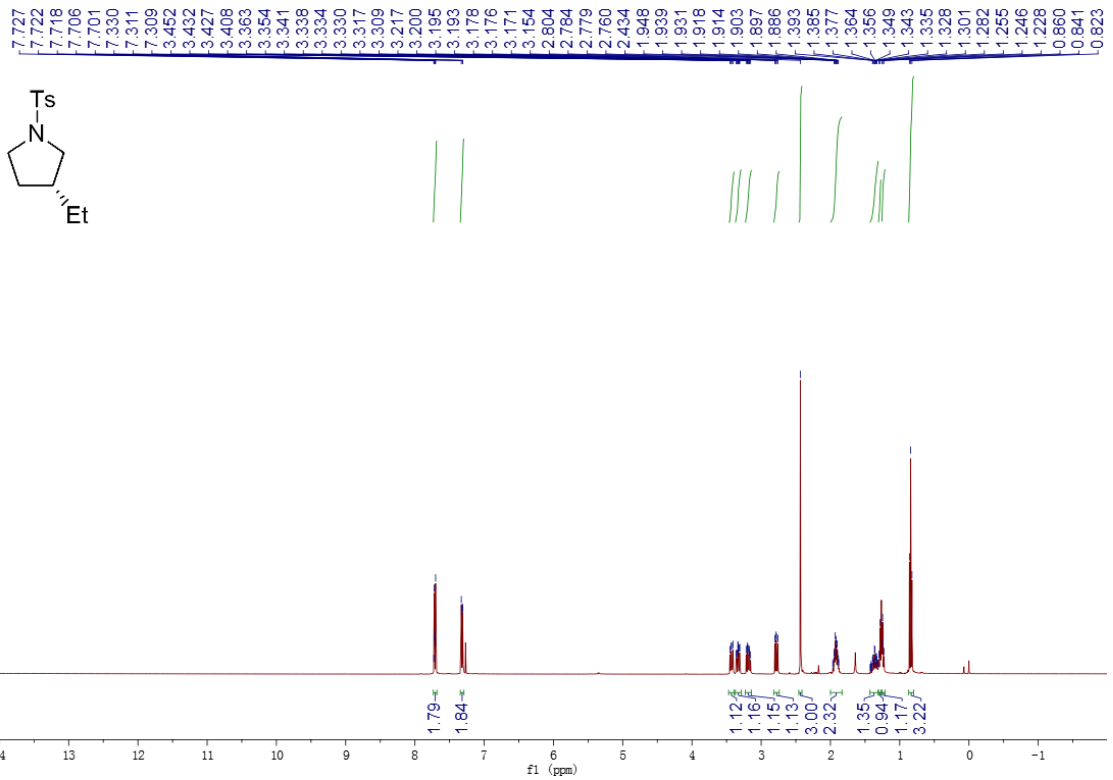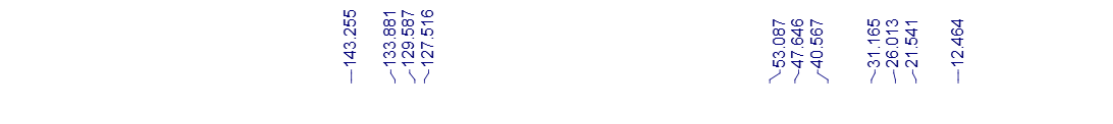

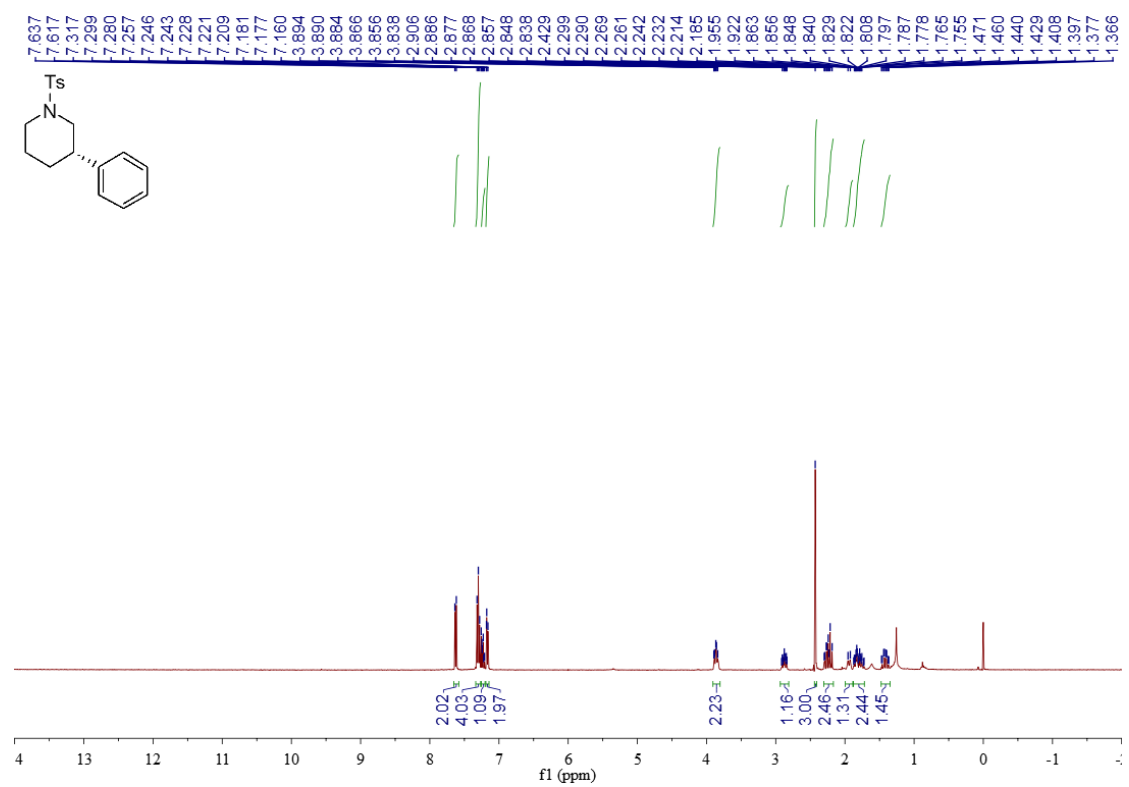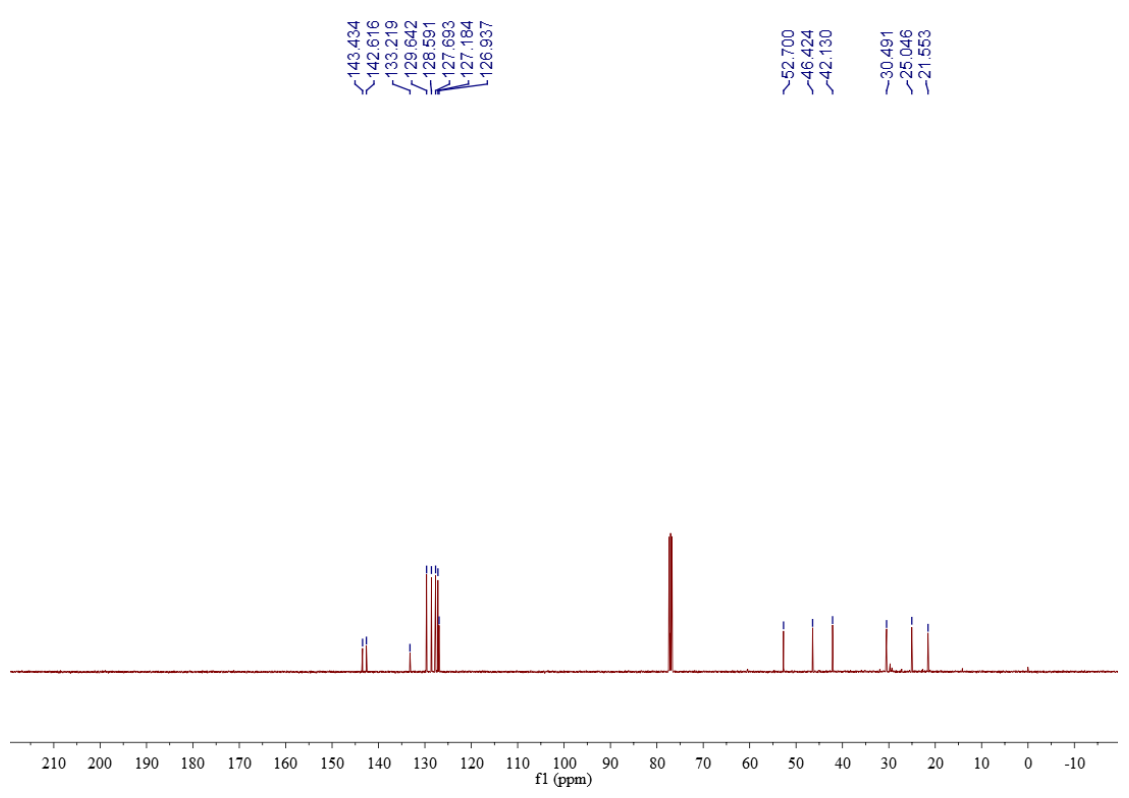

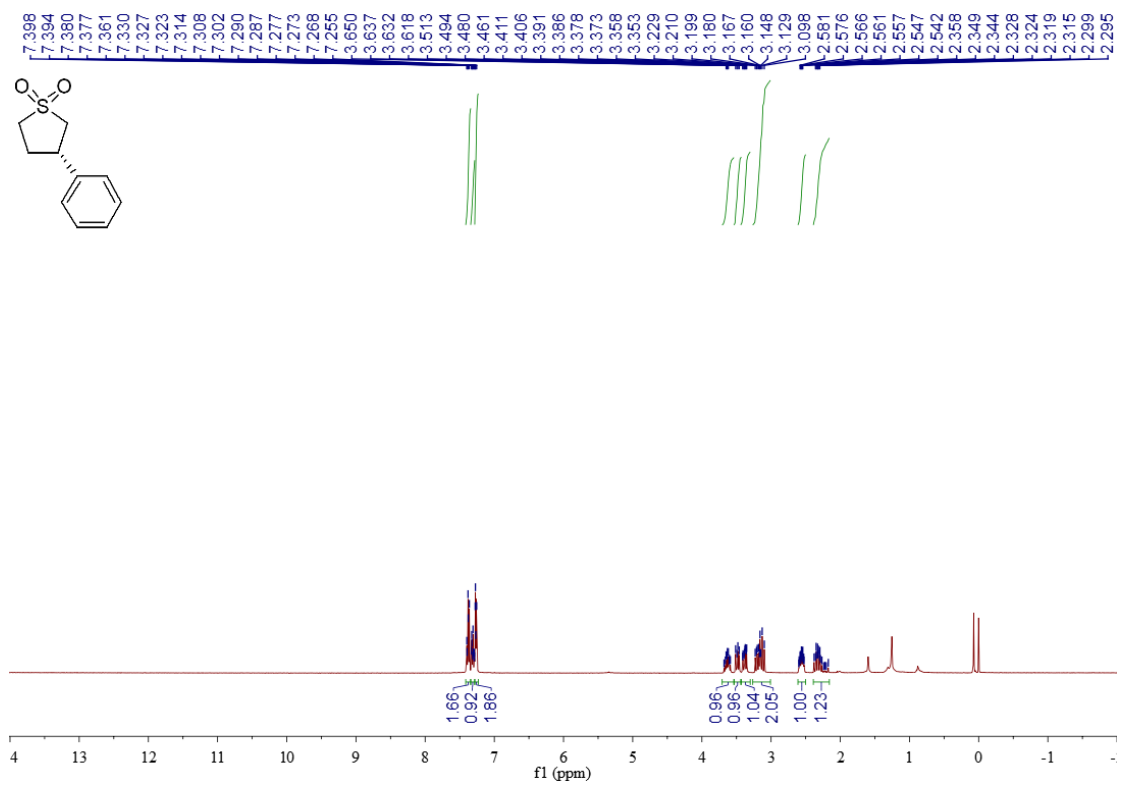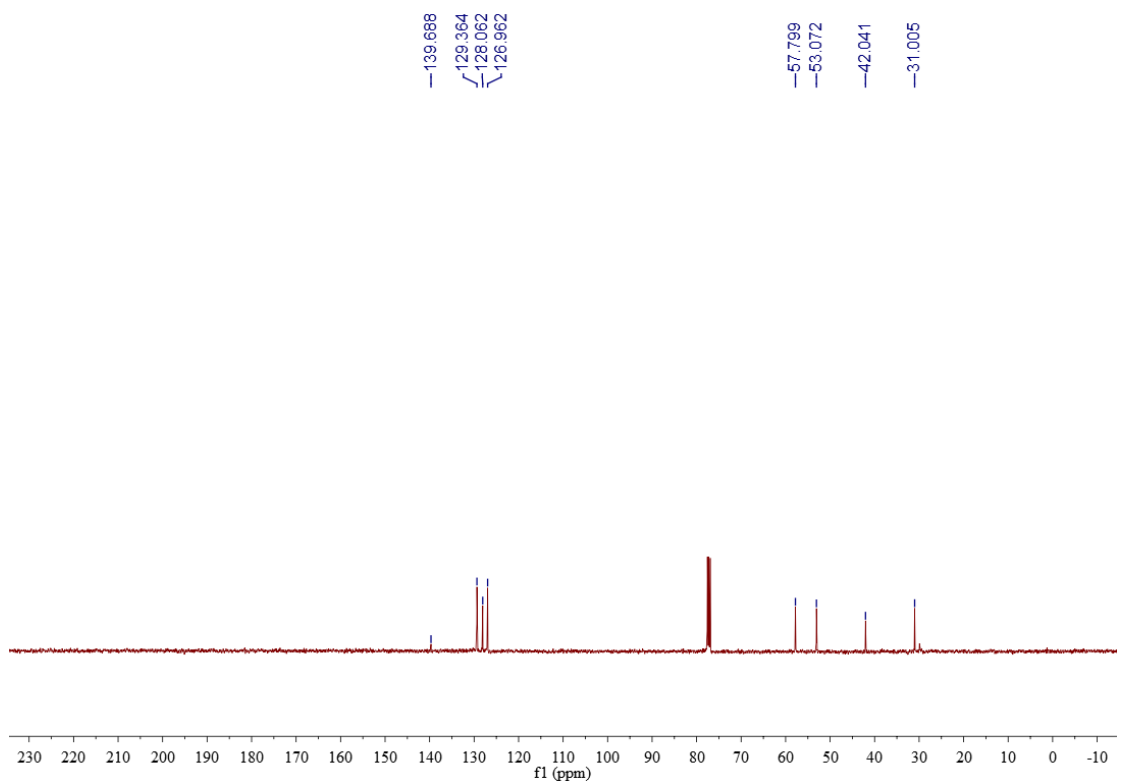

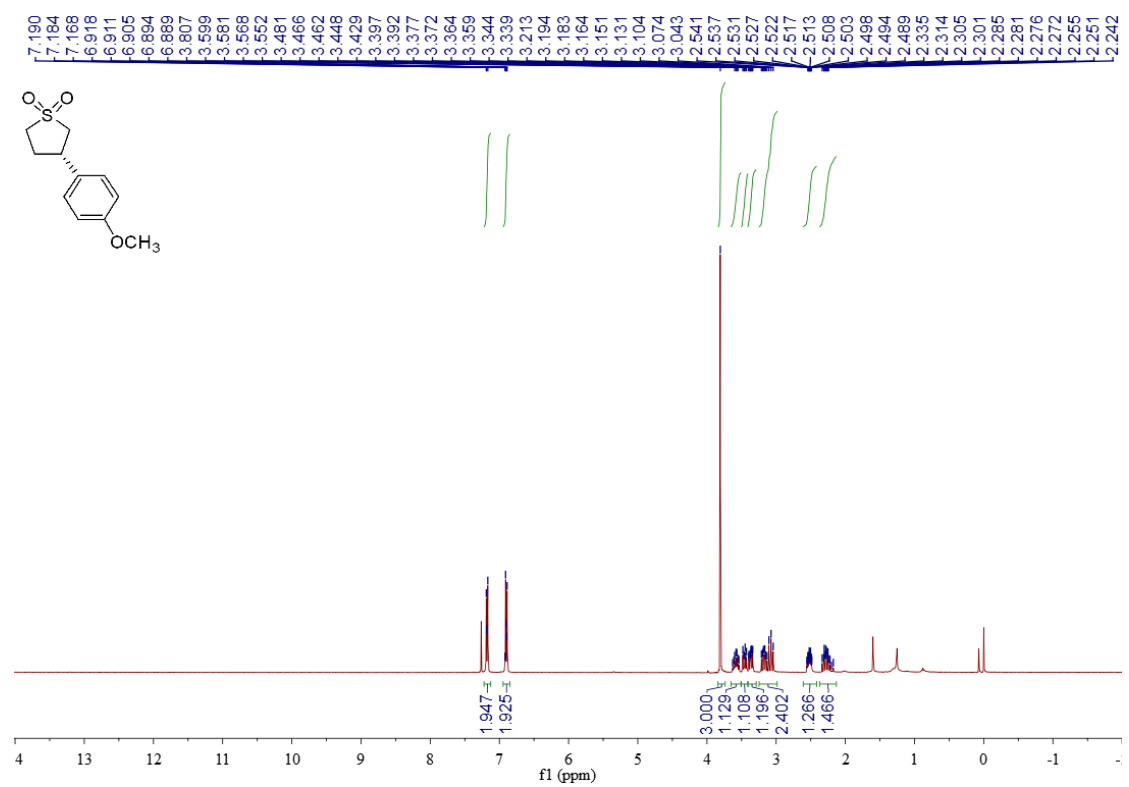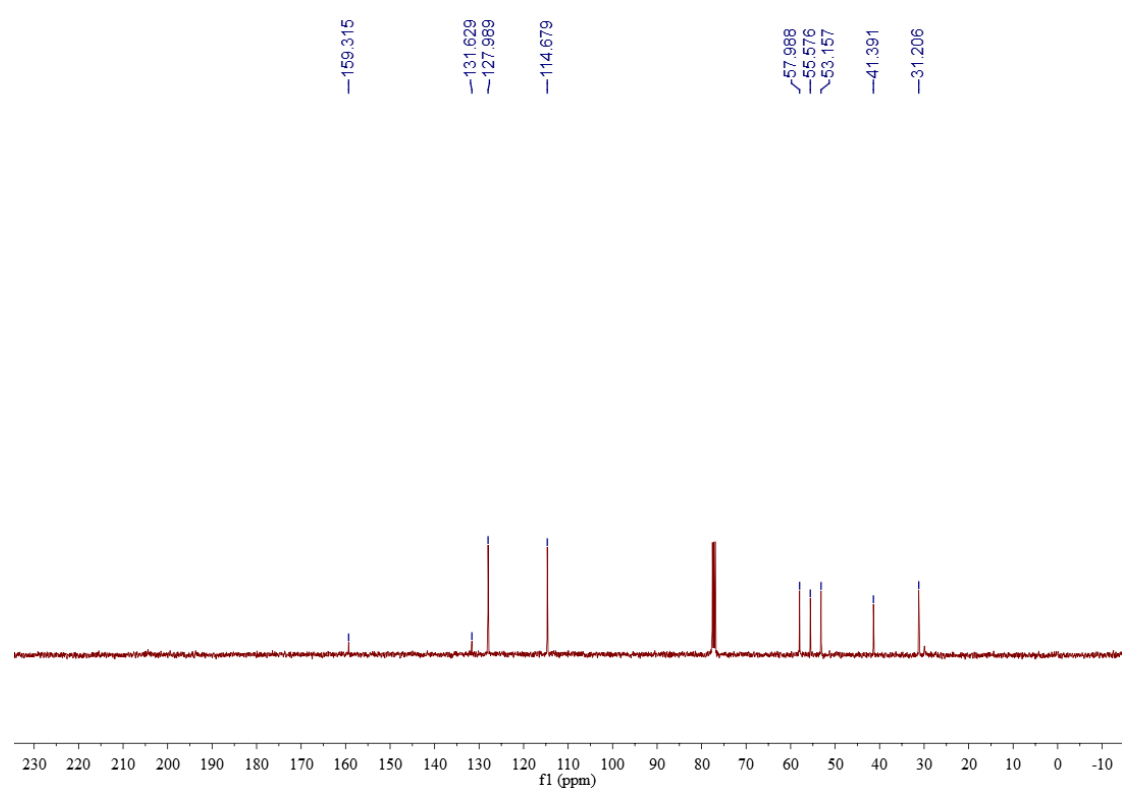

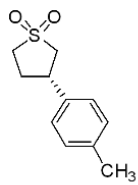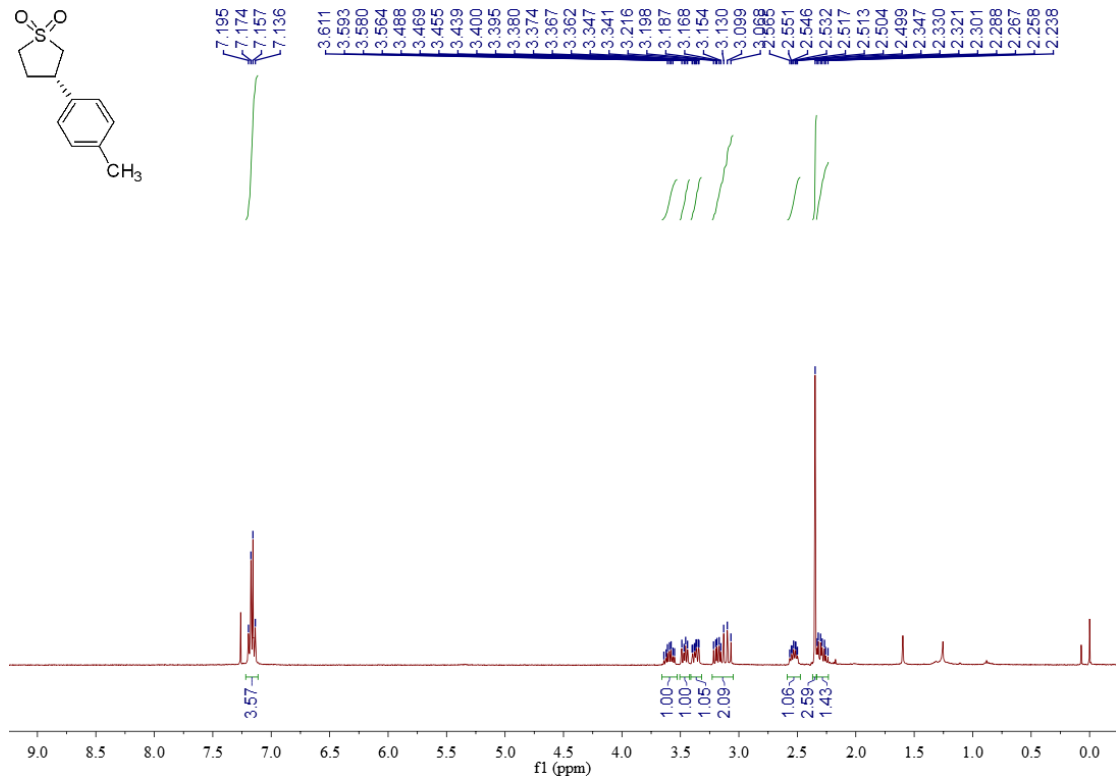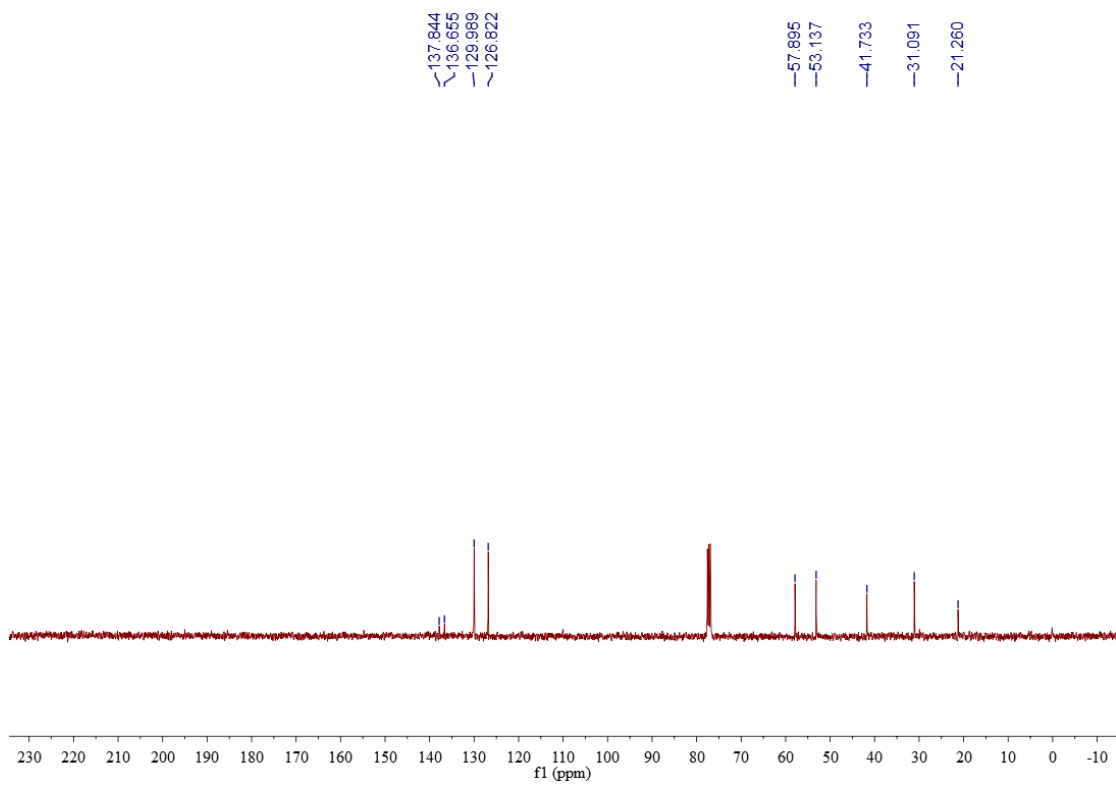



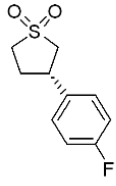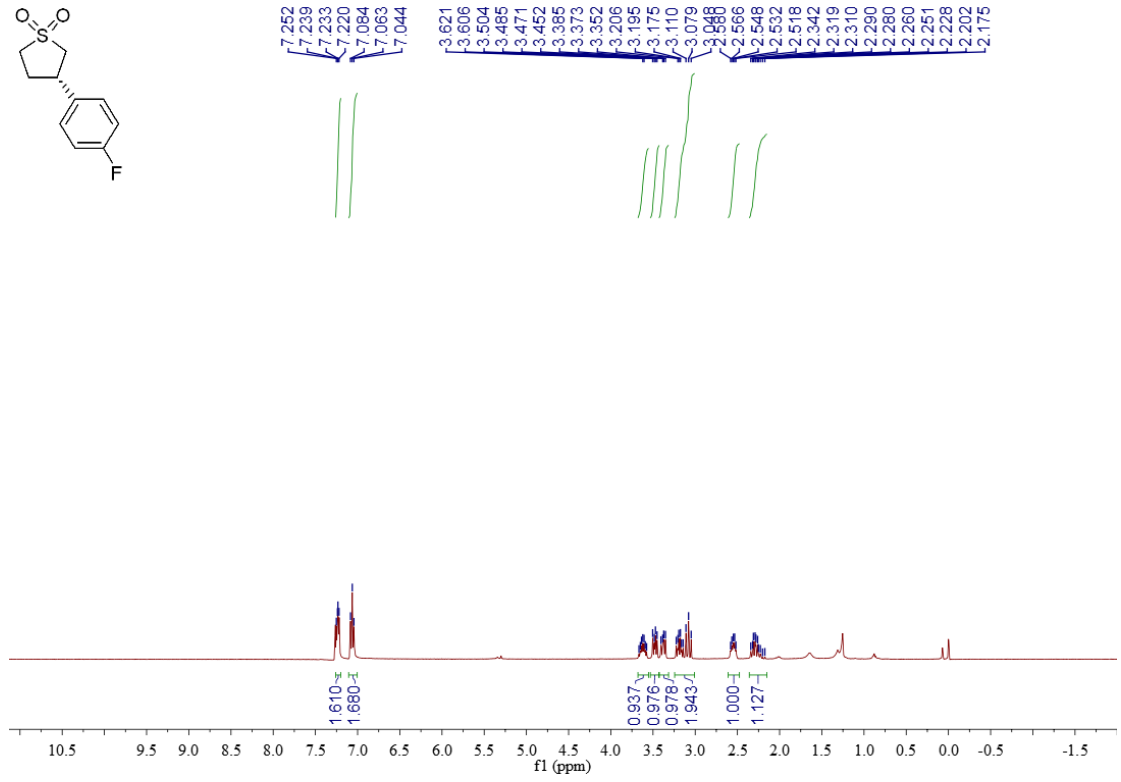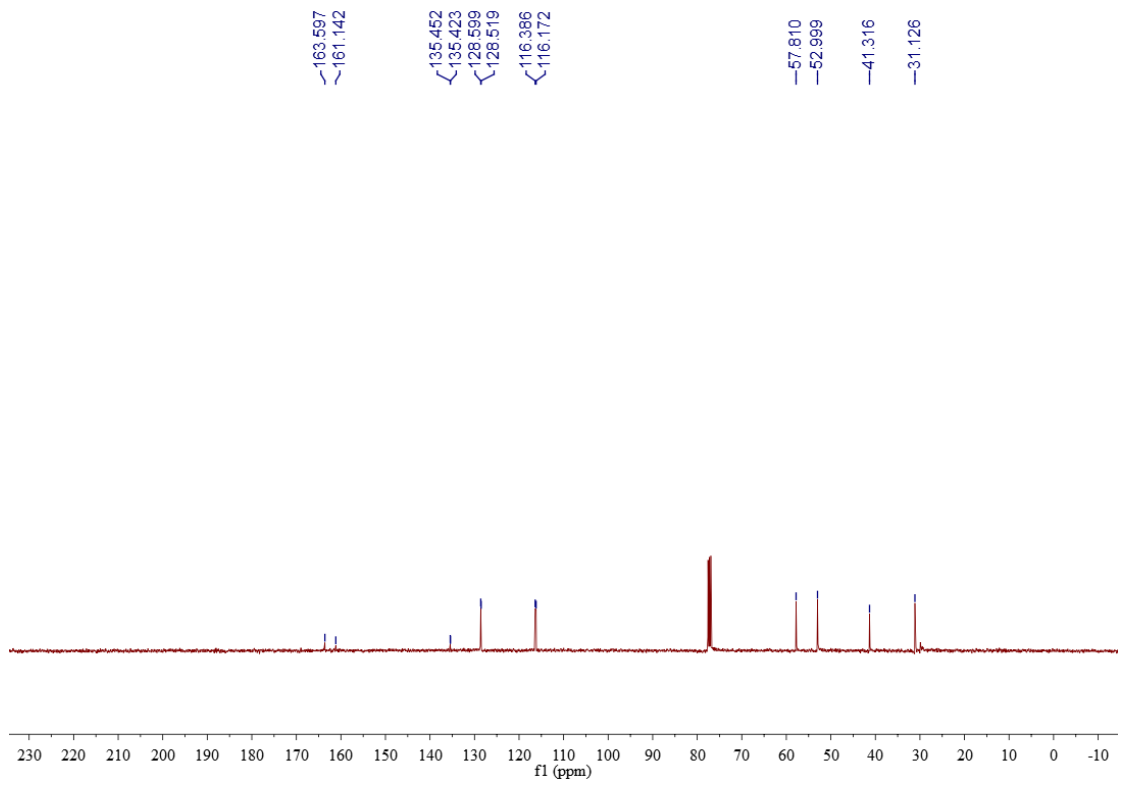

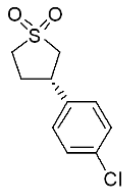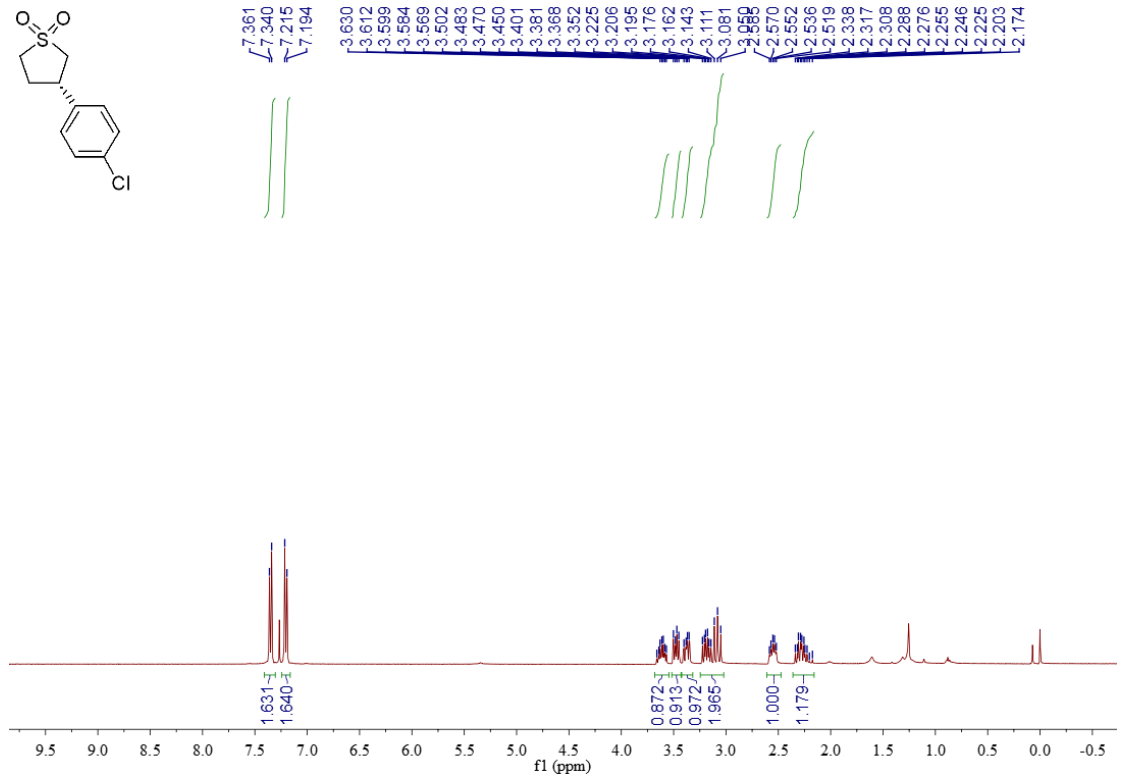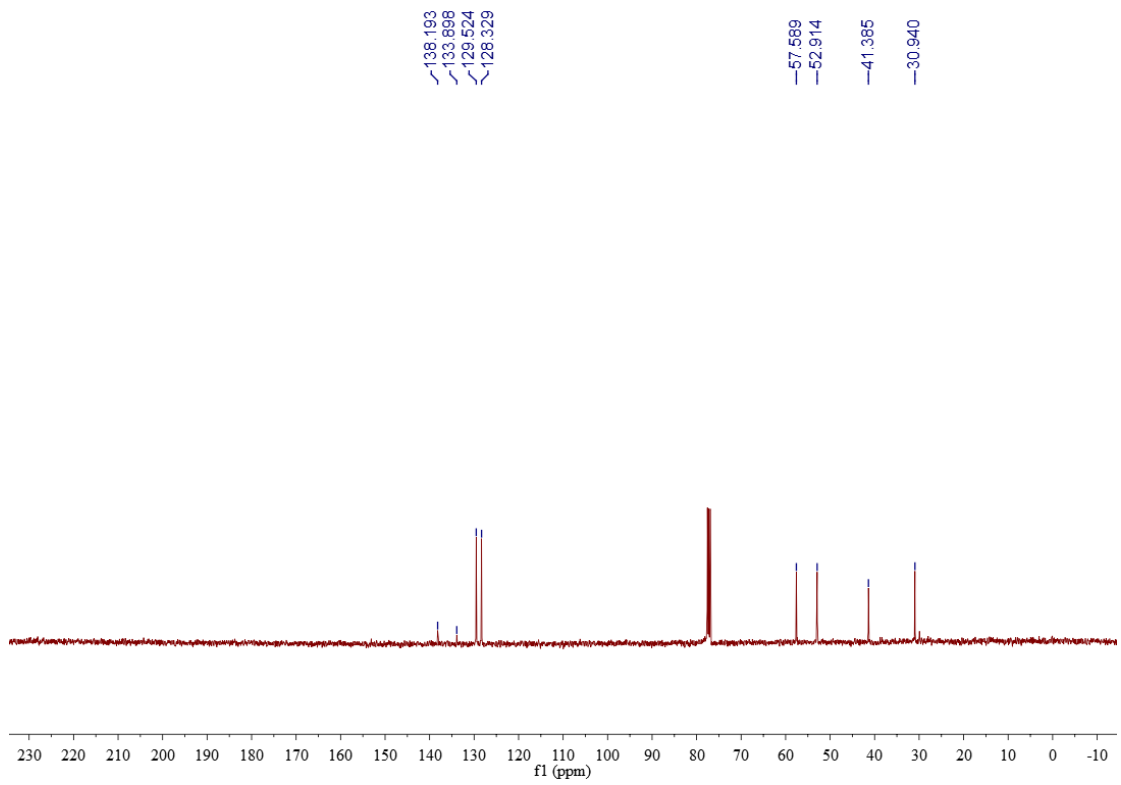

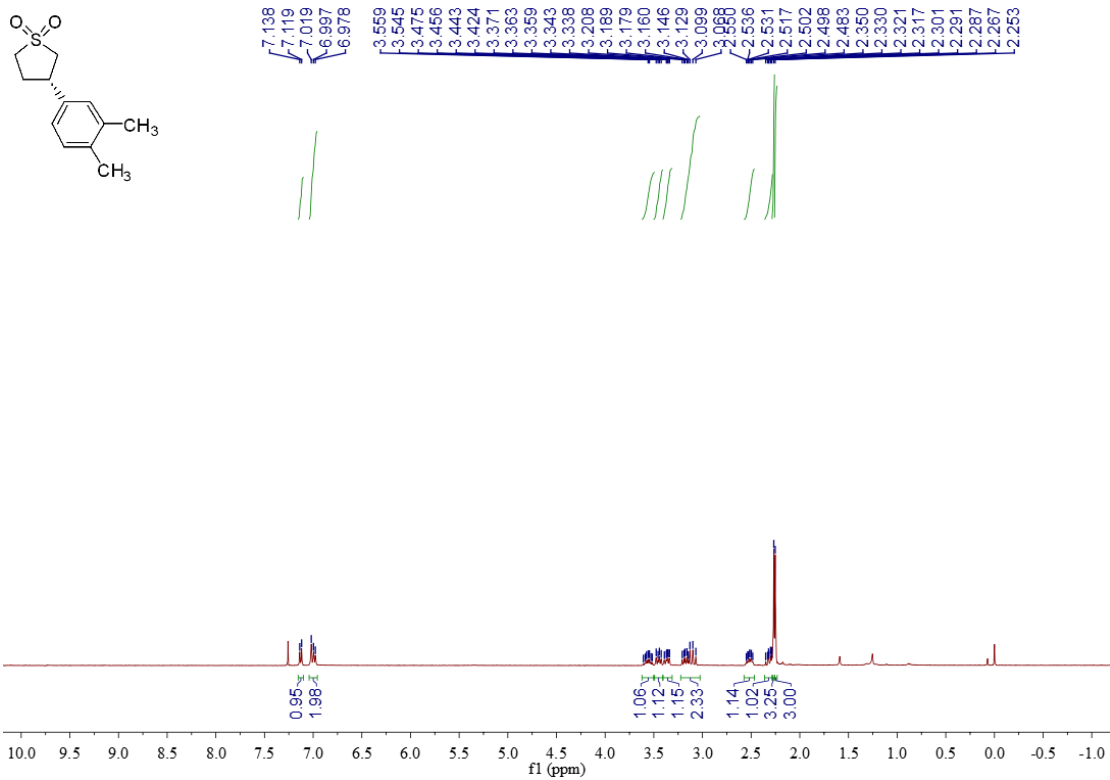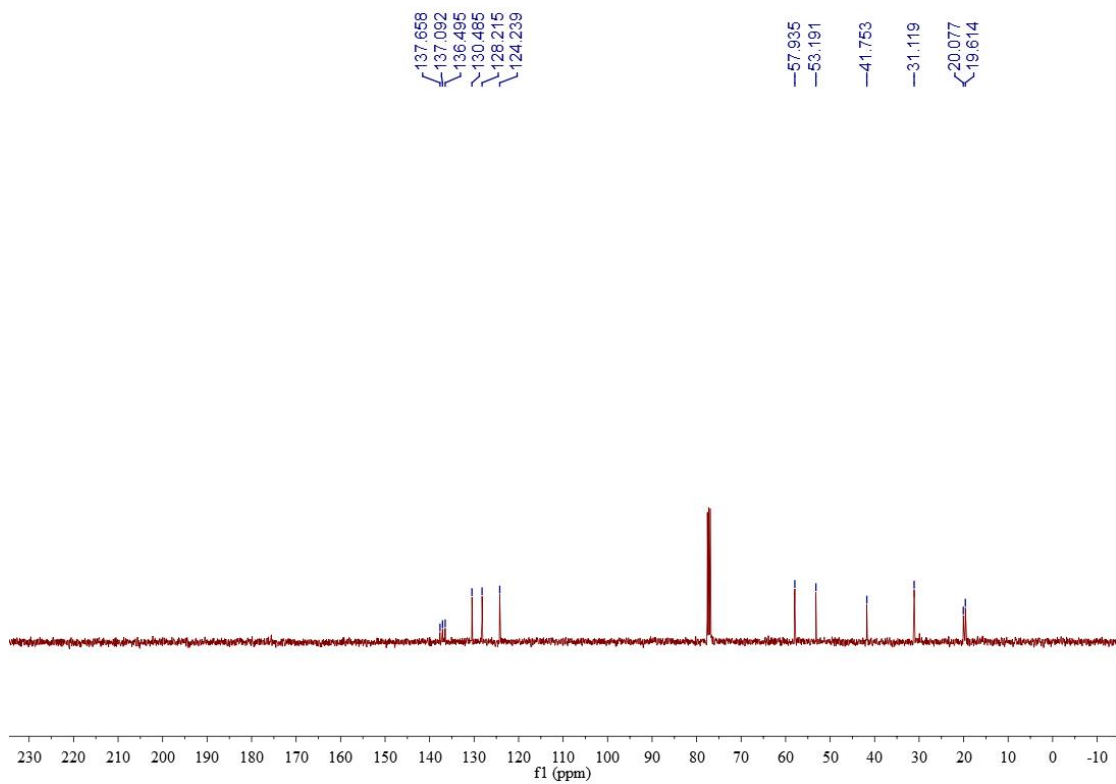

7.564  
7.545  
7.532  
7.526  
7.420  
7.407  
7.394  
7.377  
7.367  
7.347  
7.328  
7.307  
7.295  
7.288  
7.277  
7.258  
7.252  
7.249  
7.231  
7.202  
7.184  
4.147  
4.136  
4.116  
3.923  
3.916  
3.900  
3.895  
3.893  
3.815  
3.806  
3.788  
3.779  
3.761  
3.749  
3.723  
3.700  
3.693  
3.670  
3.630  
3.623  
3.605  
3.590  
3.582  
3.566  
3.506  
3.481  
3.456  
3.360  
2.363  
2.368  
2.163  
2.137  
2.110  
2.039  
2.019  
2.008

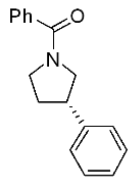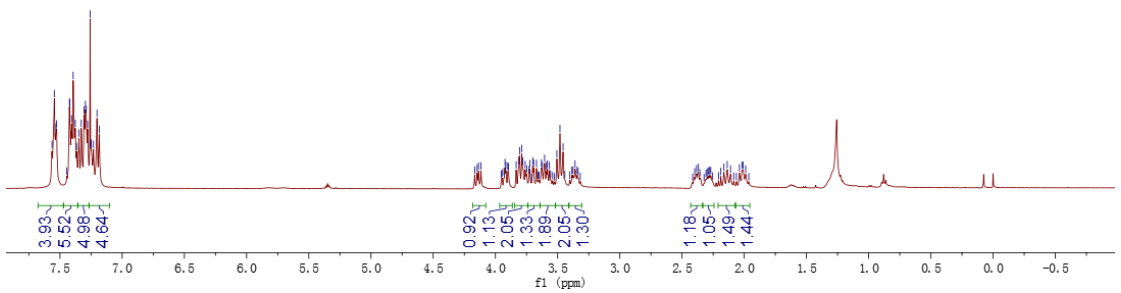

169.934  
169.711

141.042  
140.308  
136.816  
136.751  
132.915  
129.999  
128.700  
128.329  
127.173  
127.074  
127.019  
126.929

56.128  
52.252  
49.432  
46.271  
44.736  
42.831  
33.928  
31.565

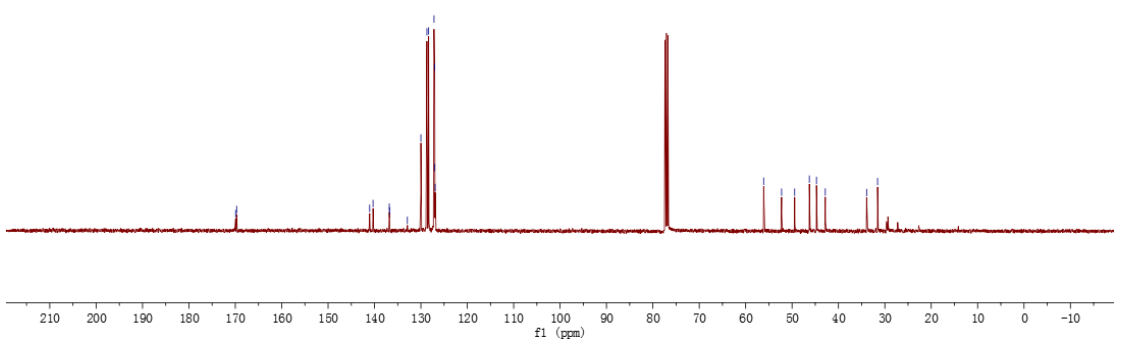

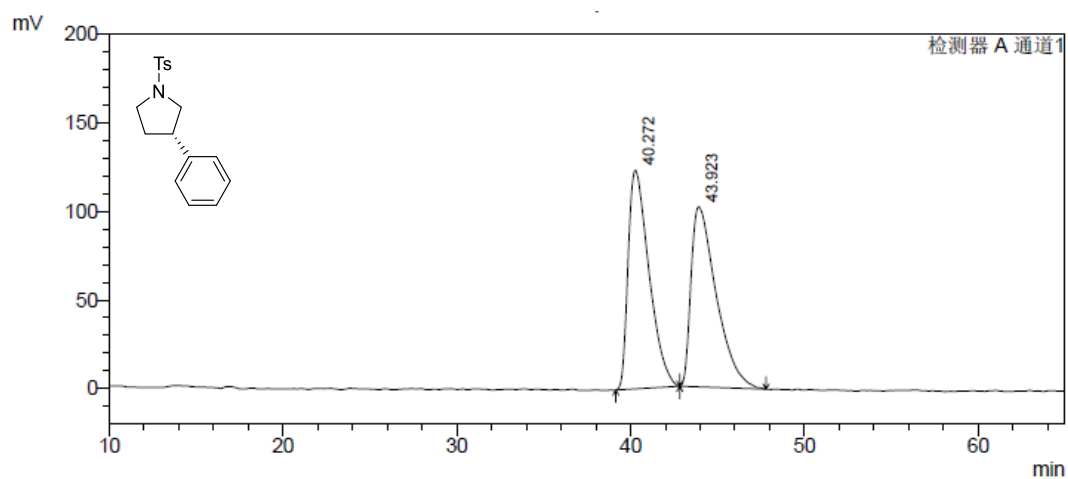

1 检测器 A 通道1/210nm

峰表

| 检测器 A Ch1 210nm |        |          |        |         |         |
|-----------------|--------|----------|--------|---------|---------|
| 峰#              | 保留时间   | 面积       | 高度     | 面积 %    | 高度 %    |
| 1               | 40.272 | 10316756 | 123449 | 50.088  | 54.807  |
| 2               | 43.923 | 10280339 | 101794 | 49.912  | 45.193  |
| 总计              |        | 20597095 | 225243 | 100.000 | 100.000 |

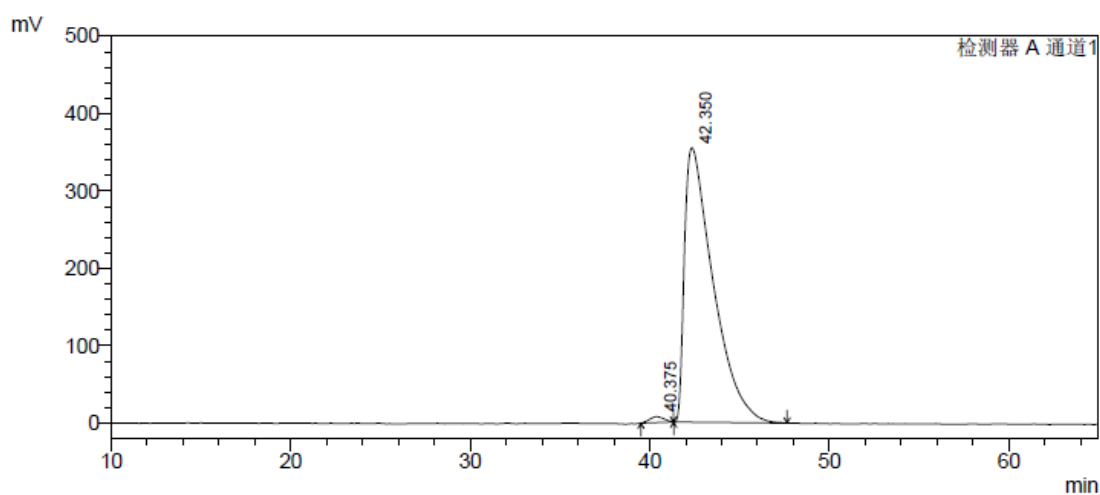

1 检测器 A 通道1/210nm

峰表

| 检测器 A Ch1 210nm |        |          |        |         |         |
|-----------------|--------|----------|--------|---------|---------|
| 峰#              | 保留时间   | 面积       | 高度     | 面积 %    | 高度 %    |
| 1               | 40.375 | 419006   | 7573   | 1.049   | 2.090   |
| 2               | 42.350 | 39543451 | 354751 | 98.951  | 97.910  |
| 总计              |        | 39962458 | 362323 | 100.000 | 100.000 |

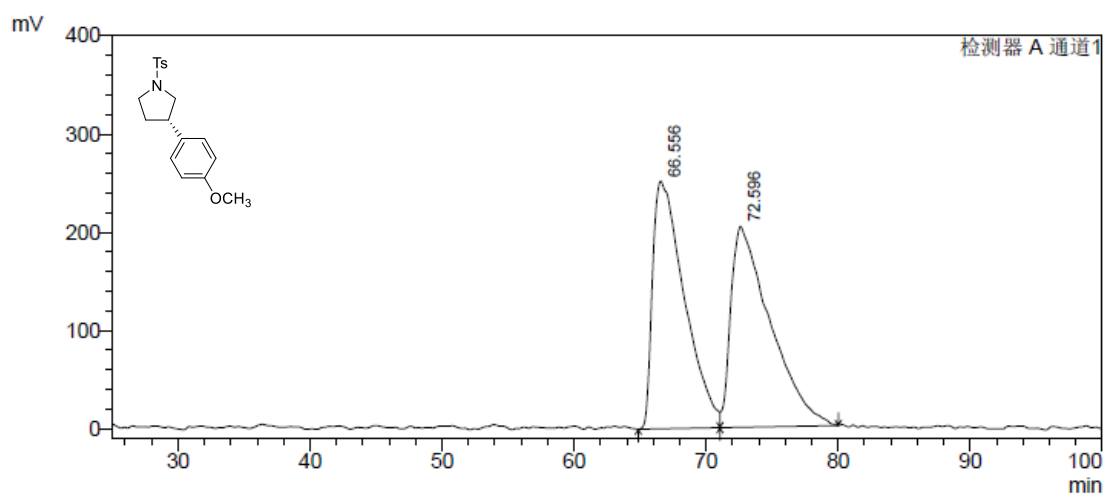

1 检测器 A 通道1/210nm

峰表

检测器 A Ch1 210nm

| 峰# | 保留时间   | 面积       | 高度     | 面积 %    | 高度 %    |
|----|--------|----------|--------|---------|---------|
| 1  | 66.556 | 42183512 | 252183 | 49.756  | 55.196  |
| 2  | 72.596 | 42597592 | 204703 | 50.244  | 44.804  |
| 总计 |        | 84781104 | 456886 | 100.000 | 100.000 |

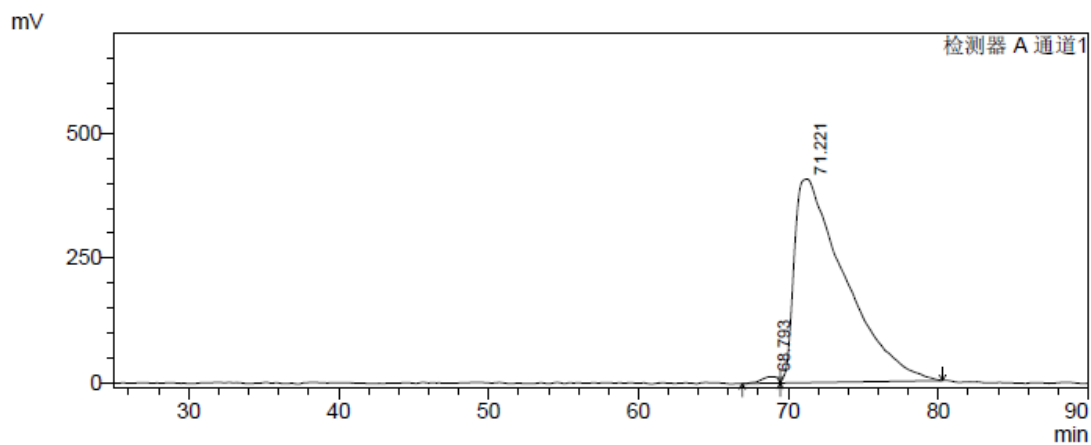

1 检测器 A 通道1/210nm

峰表

检测器 A Ch1 210nm

| 峰# | 保留时间   | 面积       | 高度     | 面积 %    | 高度 %    |
|----|--------|----------|--------|---------|---------|
| 1  | 68.793 | 1041296  | 13188  | 1.068   | 3.127   |
| 2  | 71.221 | 96483774 | 408521 | 98.932  | 96.873  |
| 总计 |        | 97525070 | 421709 | 100.000 | 100.000 |

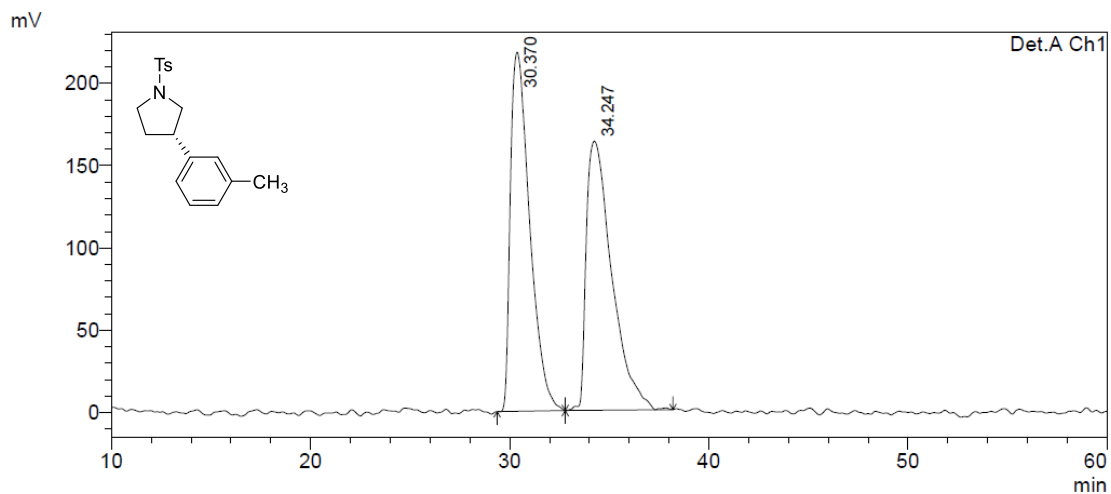

1 Det.A Ch1/210nm

PeakTable

Detector A Ch1 210nm

| Peak# | Ret. Time | Area     | Height | Area %  | Height % |
|-------|-----------|----------|--------|---------|----------|
| 1     | 30.370    | 14731454 | 218067 | 50.242  | 57.147   |
| 2     | 34.247    | 14589830 | 163526 | 49.758  | 42.853   |
| Total |           | 29321284 | 381594 | 100.000 | 100.000  |

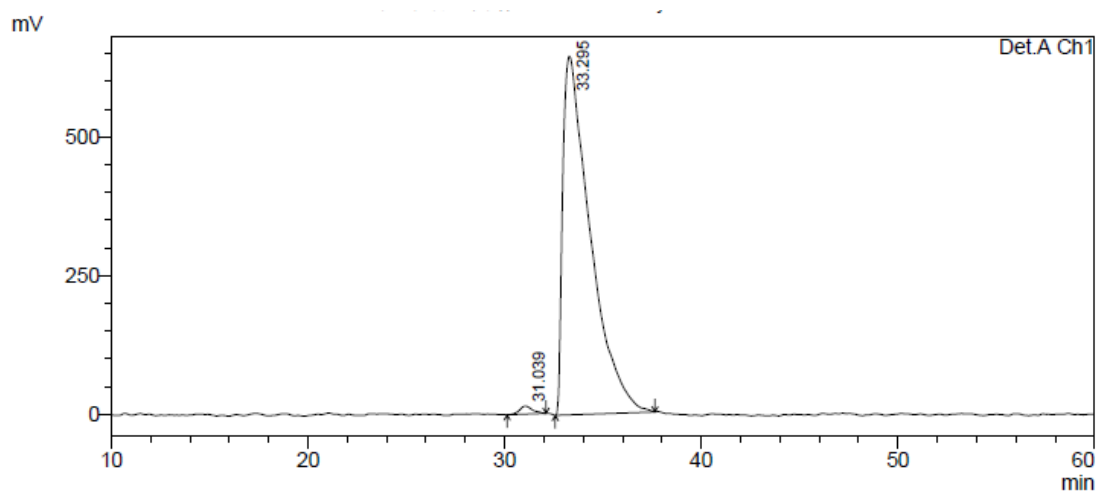

1 Det.A Ch1/210nm

PeakTable

Detector A Ch1 210nm

| Peak# | Ret. Time | Area     | Height | Area %  | Height % |
|-------|-----------|----------|--------|---------|----------|
| 1     | 31.039    | 670389   | 14639  | 1.056   | 2.215    |
| 2     | 33.295    | 62830812 | 646248 | 98.944  | 97.785   |
| Total |           | 63501201 | 660887 | 100.000 | 100.000  |

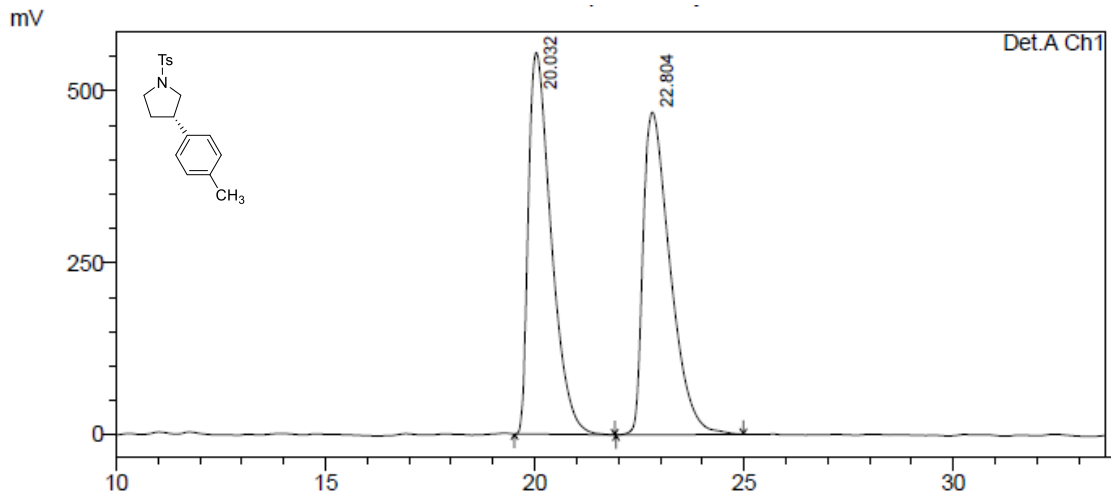

1 Det.A Ch1/210nm

PeakTable

Detector A Ch1 210nm

| Peak# | Ret. Time | Area     | Height  | Area %  | Height % |
|-------|-----------|----------|---------|---------|----------|
| 1     | 20.032    | 21011656 | 554485  | 49.892  | 54.201   |
| 2     | 22.804    | 21103002 | 468532  | 50.108  | 45.799   |
| Total |           | 42114658 | 1023017 | 100.000 | 100.000  |

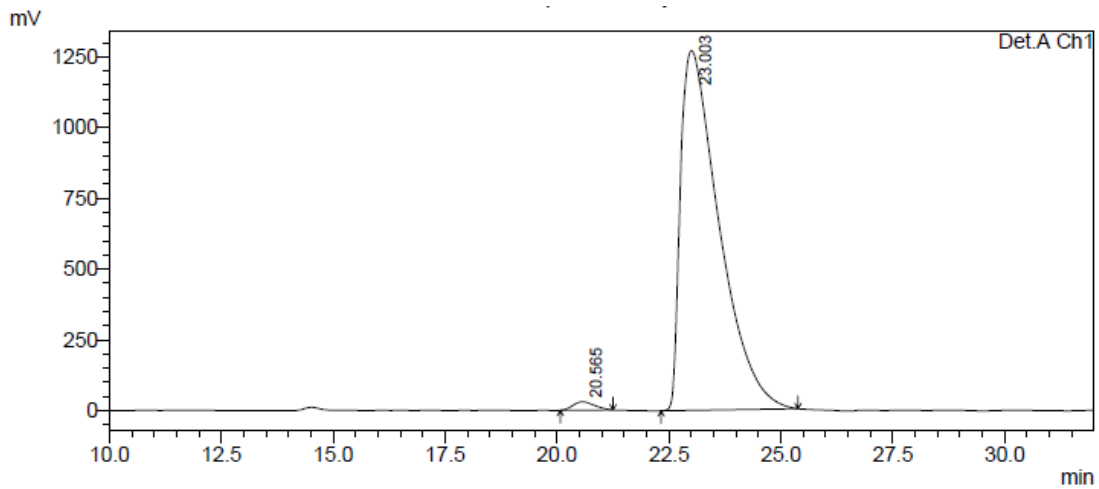

1 Det.A Ch1/210nm

PeakTable

Detector A Ch1 210nm

| Peak# | Ret. Time | Area     | Height  | Area %  | Height % |
|-------|-----------|----------|---------|---------|----------|
| 1     | 20.565    | 986414   | 29421   | 1.273   | 2.261    |
| 2     | 23.003    | 76482245 | 1271616 | 98.727  | 97.739   |
| Total |           | 77468660 | 1301037 | 100.000 | 100.000  |



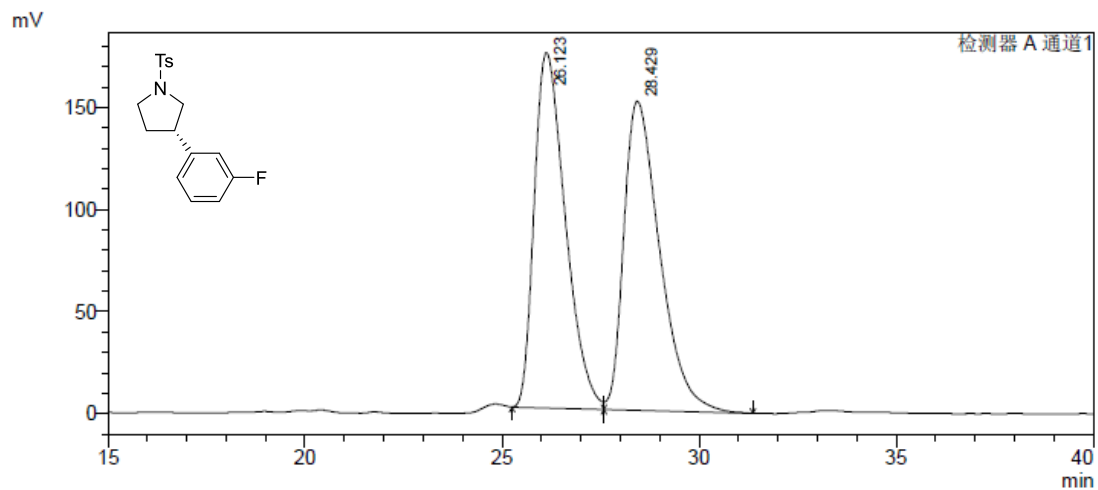

1 检测器 A 通道1/210nm

峰表

Detector A Ch1 210nm

| 峰# | 保留时间   | 面积       | 高度     | 面积 %    | 高度 %    |
|----|--------|----------|--------|---------|---------|
| 1  | 26.123 | 9552059  | 174148 | 49.851  | 53.473  |
| 2  | 28.429 | 9609166  | 151527 | 50.149  | 46.527  |
| 总计 |        | 19161225 | 325676 | 100.000 | 100.000 |

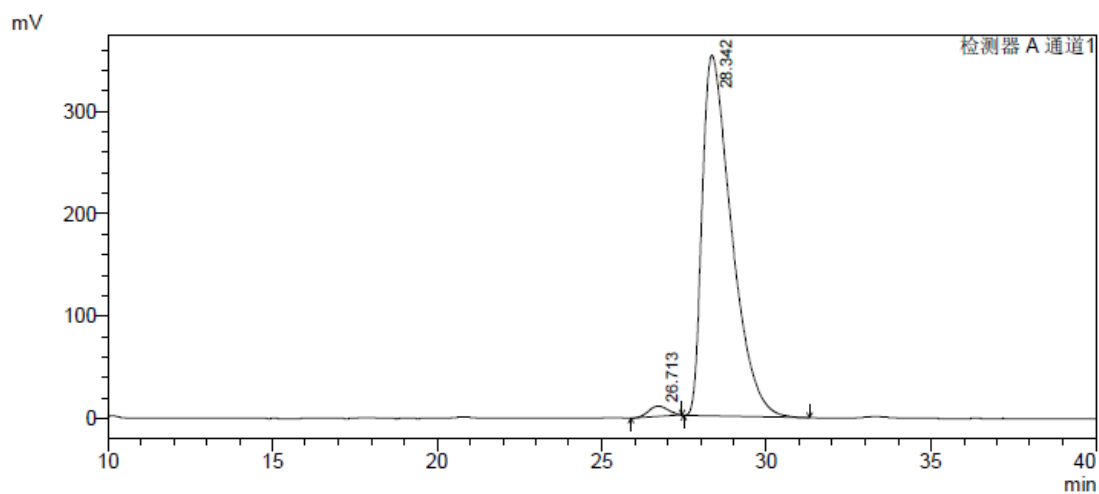

1 检测器 A 通道1/210nm

峰表

Detector A Ch1 210nm

| 峰# | 保留时间   | 面积       | 高度     | 面积 %    | 高度 %    |
|----|--------|----------|--------|---------|---------|
| 1  | 26.713 | 413429   | 10054  | 1.864   | 2.776   |
| 2  | 28.342 | 21766352 | 352092 | 98.136  | 97.224  |
| 总计 |        | 22179781 | 362146 | 100.000 | 100.000 |

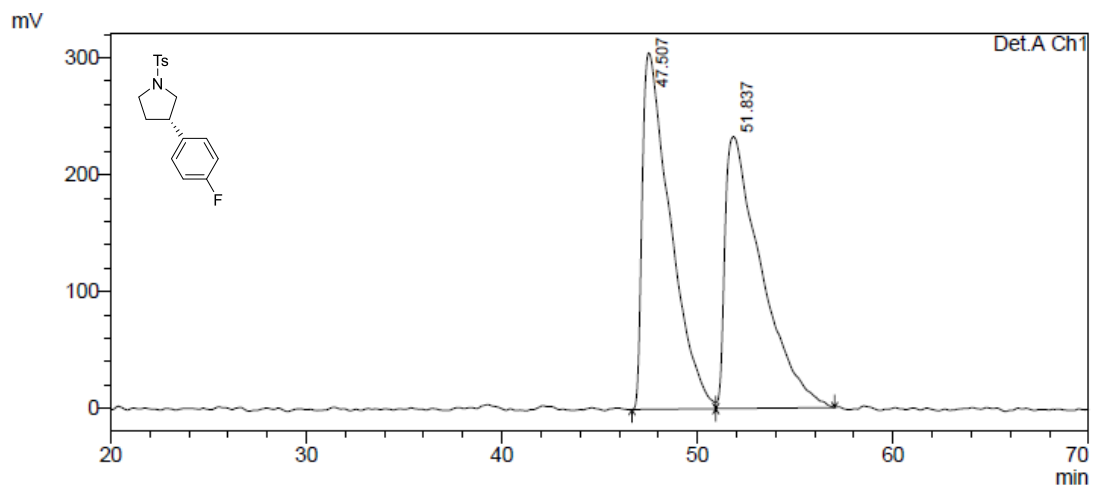

1 Det.A Ch1/210nm

PeakTable

| Detector A Ch1 210nm |           |          |        |         |          |
|----------------------|-----------|----------|--------|---------|----------|
| Peak#                | Ret. Time | Area     | Height | Area %  | Height % |
| 1                    | 47.507    | 30371052 | 304735 | 50.158  | 56.738   |
| 2                    | 51.837    | 30180242 | 232352 | 49.842  | 43.262   |
| Total                |           | 60551294 | 537088 | 100.000 | 100.000  |

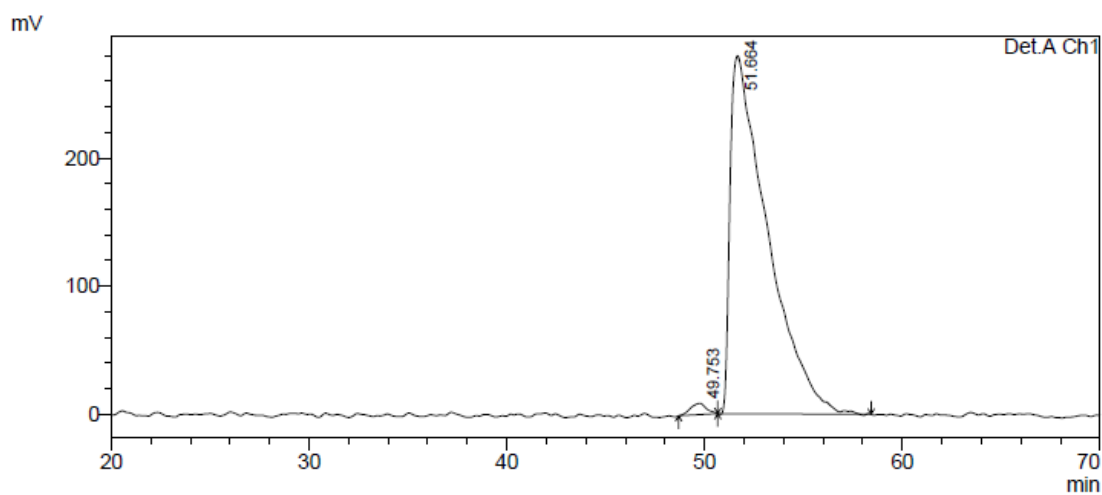

1 Det.A Ch1/210nm

PeakTable

| Detector A Ch1 210nm |           |          |        |         |          |
|----------------------|-----------|----------|--------|---------|----------|
| Peak#                | Ret. Time | Area     | Height | Area %  | Height % |
| 1                    | 49.753    | 497119   | 8779   | 1.333   | 3.044    |
| 2                    | 51.664    | 36790800 | 279651 | 98.667  | 96.956   |
| Total                |           | 37287919 | 288430 | 100.000 | 100.000  |

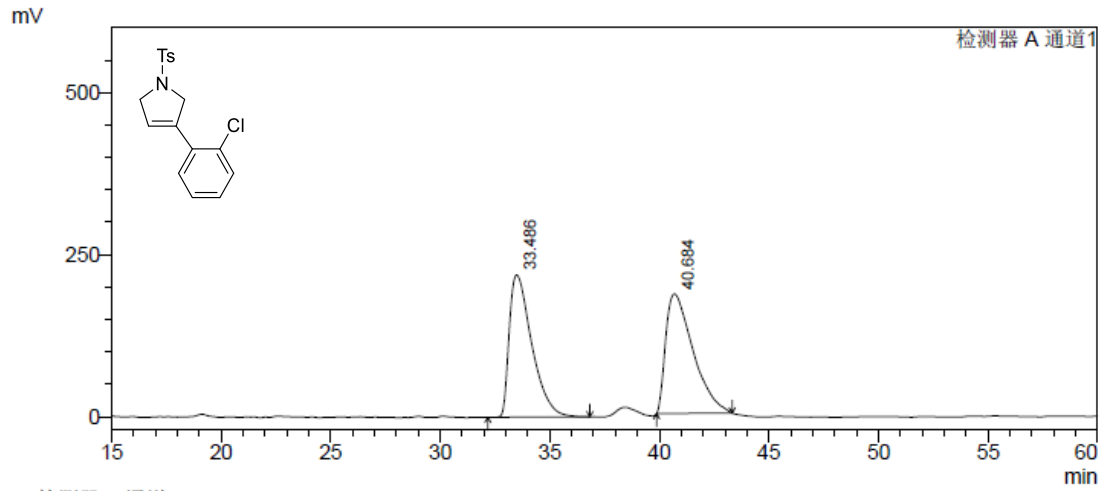

峰表

检测器 A Ch1 210nm

| 峰# | 保留时间   | 面积       | 高度     | 面积 %    | 高度 %    |
|----|--------|----------|--------|---------|---------|
| 1  | 33.486 | 15679636 | 219338 | 49.426  | 54.327  |
| 2  | 40.684 | 16043656 | 184399 | 50.574  | 45.673  |
| 总计 |        | 31723293 | 403737 | 100.000 | 100.000 |

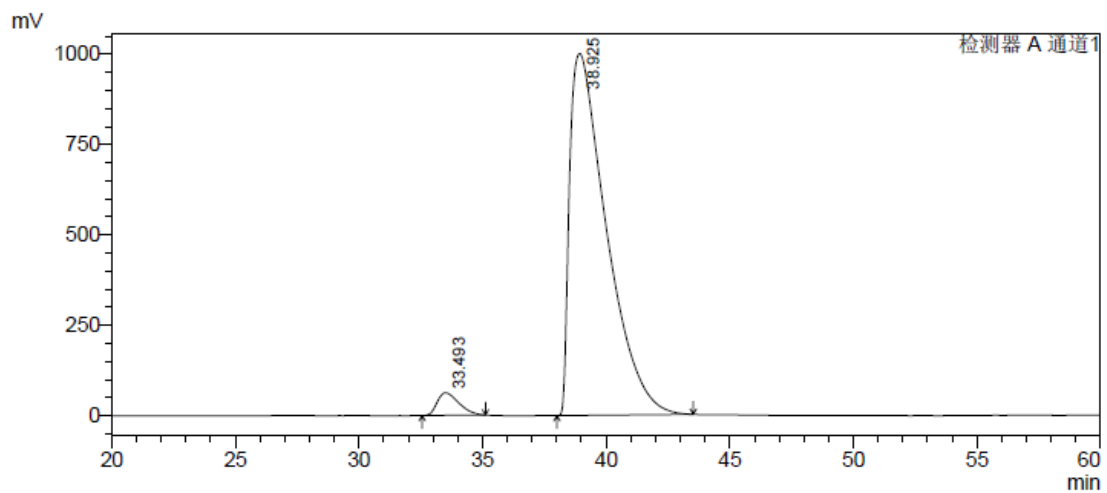

峰表

检测器 A Ch1 210nm

| 峰# | 保留时间   | 面积        | 高度      | 面积 %    | 高度 %    |
|----|--------|-----------|---------|---------|---------|
| 1  | 33.493 | 3802053   | 62418   | 3.537   | 5.869   |
| 2  | 38.925 | 103677199 | 1001071 | 96.463  | 94.131  |
| 总计 |        | 107479251 | 1063489 | 100.000 | 100.000 |

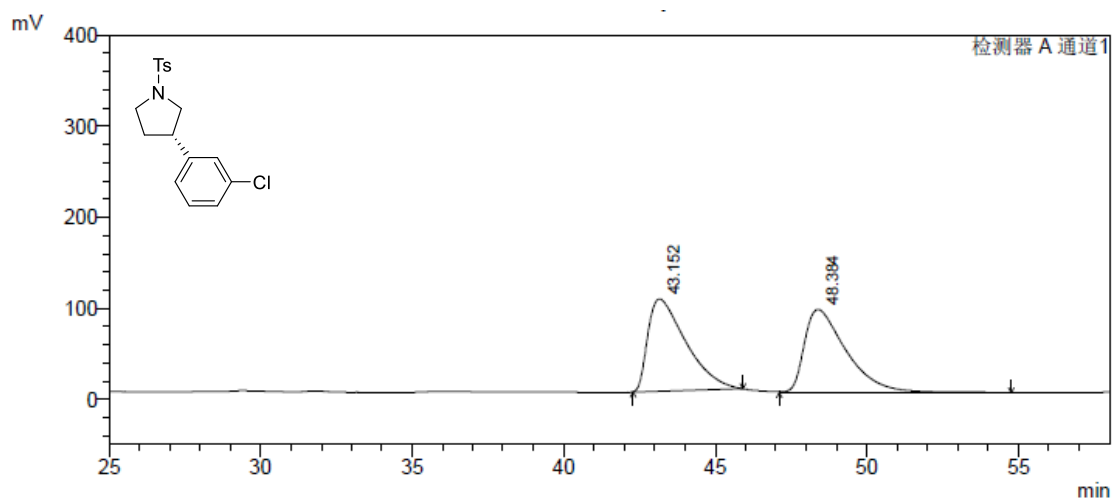

1 检测器 A 通道1/210nm

峰表

Detector A Ch1 210nm

| 峰# | 保留时间   | 面积       | 高度     | 面积 %    | 高度 %    |
|----|--------|----------|--------|---------|---------|
| 1  | 43.152 | 8847206  | 101218 | 49.813  | 52.484  |
| 2  | 48.384 | 8913745  | 91635  | 50.187  | 47.516  |
| 总计 |        | 17760951 | 192852 | 100.000 | 100.000 |

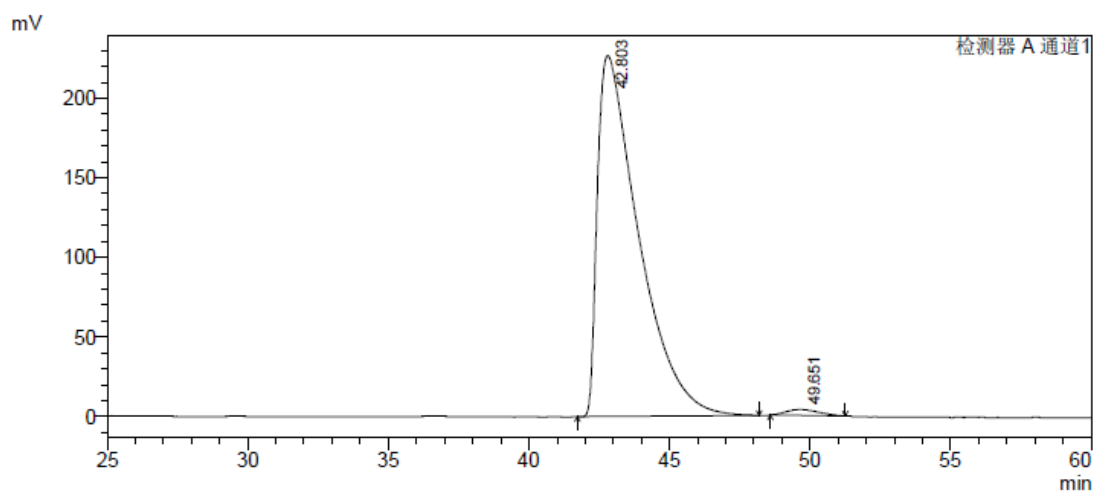

1 检测器 A 通道1/210nm

峰表

Detector A Ch1 210nm

| 峰# | 保留时间   | 面积       | 高度     | 面积 %    | 高度 %    |
|----|--------|----------|--------|---------|---------|
| 1  | 42.803 | 23147305 | 226834 | 98.718  | 98.368  |
| 2  | 49.651 | 300485   | 3764   | 1.282   | 1.632   |
| 总计 |        | 23447791 | 230597 | 100.000 | 100.000 |

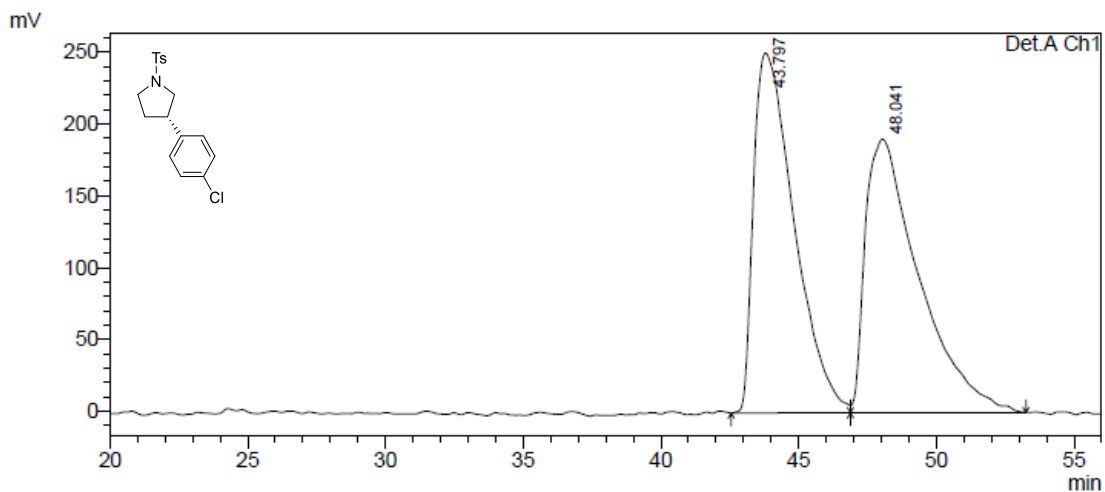

1 Det.A Ch1/210nm

PeakTable

Detector A Ch1 210nm

| Peak# | Ret. Time | Area     | Height | Area %  | Height % |
|-------|-----------|----------|--------|---------|----------|
| 1     | 43.797    | 25724680 | 250874 | 49.843  | 56.822   |
| 2     | 48.041    | 25886909 | 190631 | 50.157  | 43.178   |
| Total |           | 51611589 | 441504 | 100.000 | 100.000  |

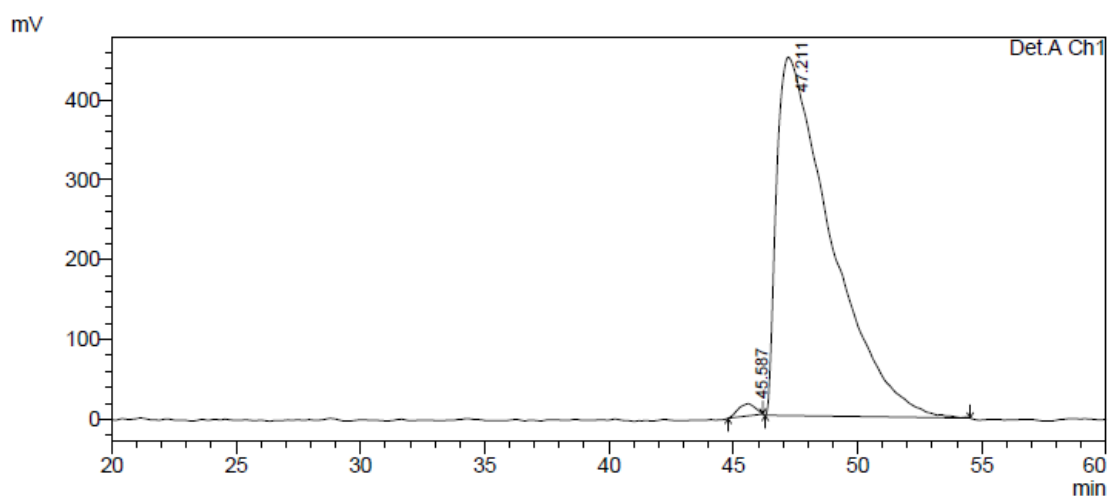

1 Det.A Ch1/210nm

PeakTable

Detector A Ch1 210nm

| Peak# | Ret. Time | Area     | Height | Area %  | Height % |
|-------|-----------|----------|--------|---------|----------|
| 1     | 45.587    | 720616   | 15177  | 1.042   | 3.269    |
| 2     | 47.211    | 68431046 | 449166 | 98.958  | 96.731   |
| Total |           | 69151662 | 464343 | 100.000 | 100.000  |

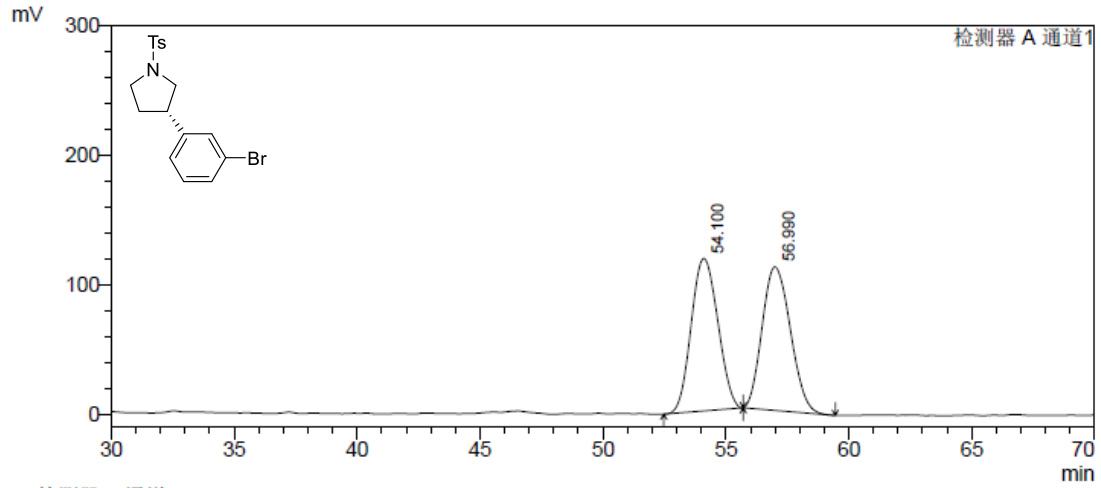

1 检测器 A 通道1/210nm

峰表

检测器 A Ch1 210nm

| 峰# | 保留时间   | 面积       | 高度     | 面积 %    | 高度 %    |
|----|--------|----------|--------|---------|---------|
| 1  | 54.100 | 8897587  | 117946 | 49.999  | 51.481  |
| 2  | 56.990 | 8897819  | 111158 | 50.001  | 48.519  |
| 总计 |        | 17795406 | 229103 | 100.000 | 100.000 |

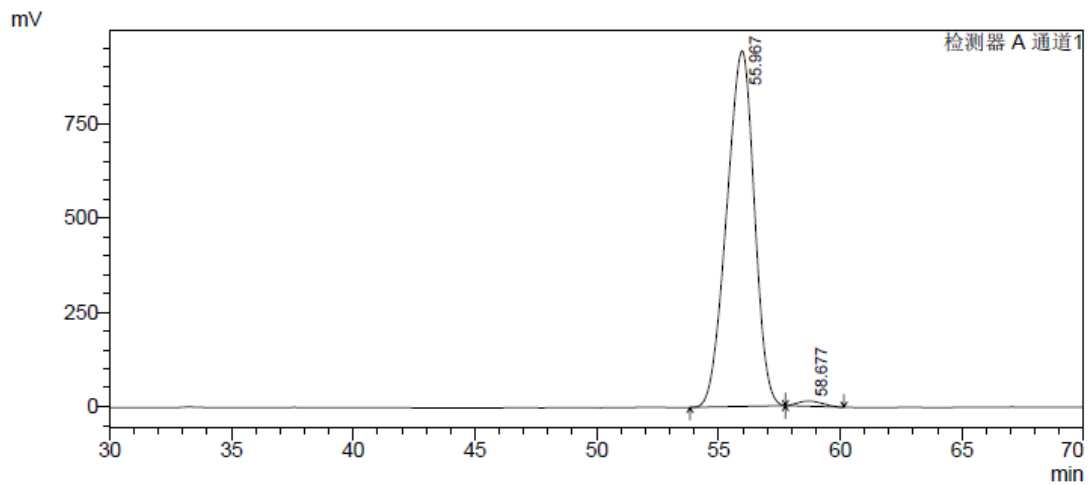

1 检测器 A 通道1/210nm

峰表

检测器 A Ch1 210nm

| 峰# | 保留时间   | 面积       | 高度     | 面积 %    | 高度 %    |
|----|--------|----------|--------|---------|---------|
| 1  | 55.967 | 74554727 | 943392 | 98.713  | 98.544  |
| 2  | 58.677 | 972324   | 13939  | 1.287   | 1.456   |
| 总计 |        | 75527051 | 957331 | 100.000 | 100.000 |

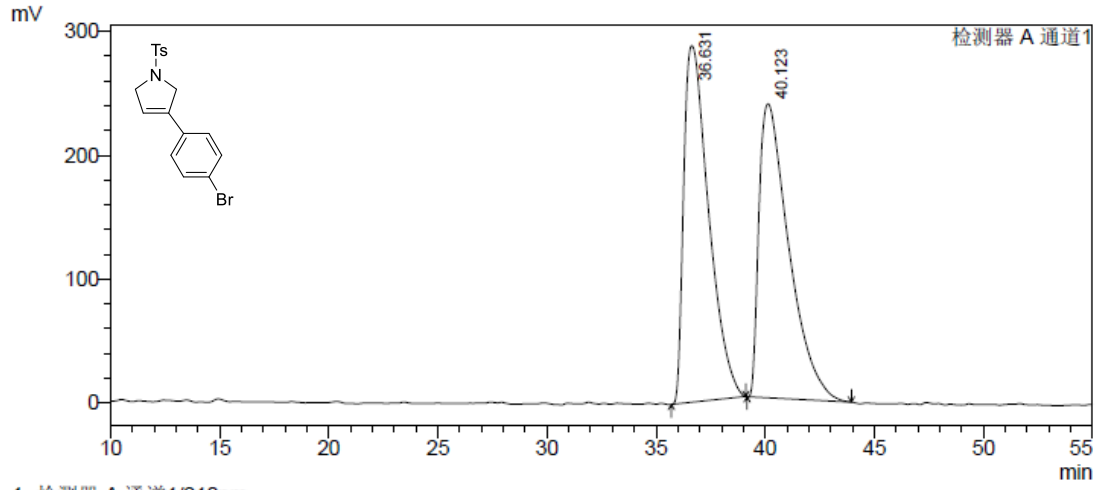

峰表

| 峰# | 保留时间   | 面积       | 高度     | 面积 %    | 高度 %    |
|----|--------|----------|--------|---------|---------|
| 1  | 36.631 | 22864345 | 287697 | 50.267  | 54.799  |
| 2  | 40.123 | 22621187 | 237309 | 49.733  | 45.201  |
| 总计 |        | 45485532 | 525005 | 100.000 | 100.000 |

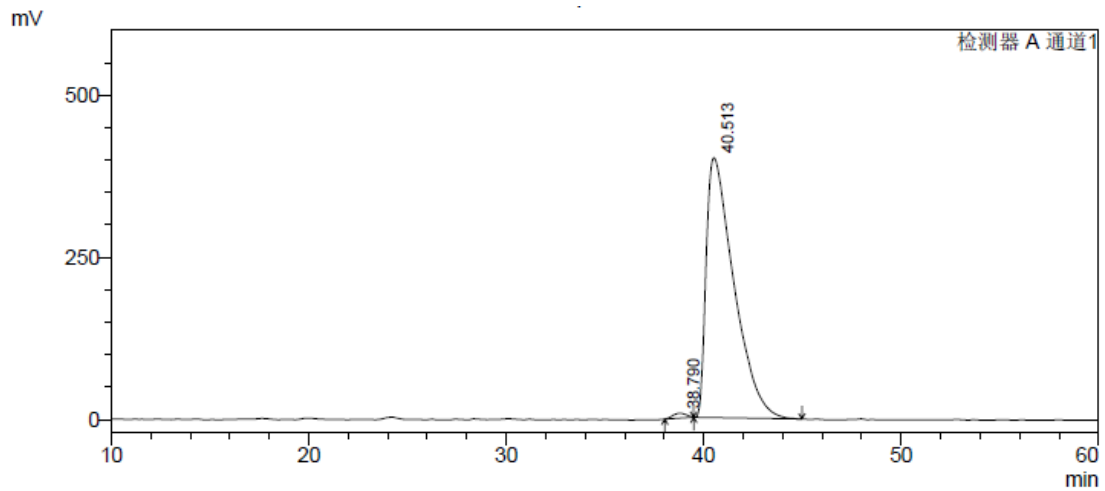

峰表

| 峰# | 保留时间   | 面积       | 高度     | 面积 %    | 高度 %    |
|----|--------|----------|--------|---------|---------|
| 1  | 38.790 | 352047   | 7438   | 0.893   | 1.823   |
| 2  | 40.513 | 39089495 | 400484 | 99.107  | 98.177  |
| 总计 |        | 39441542 | 407922 | 100.000 | 100.000 |

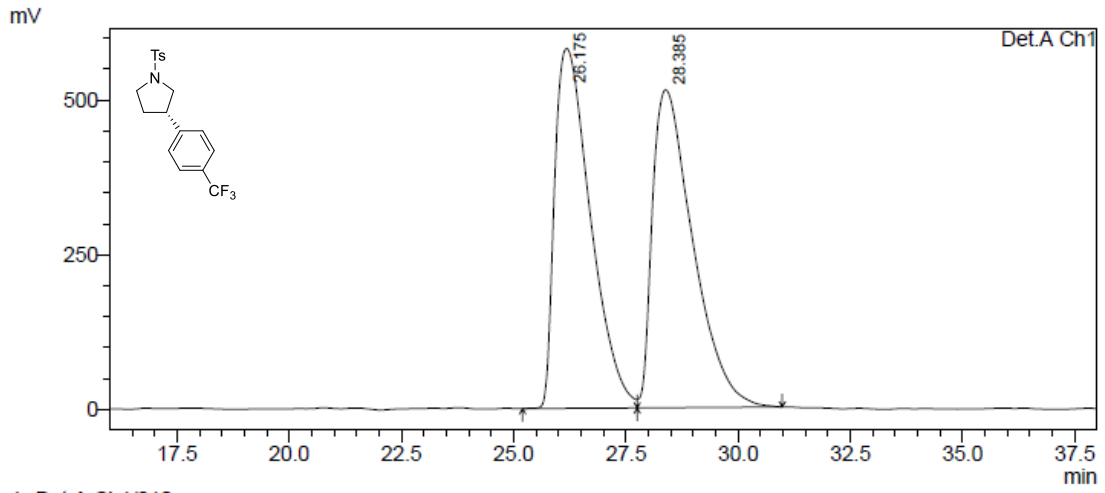

1 Det.A Ch1/210nm

PeakTable

Detector A Ch1 210nm

| Peak# | Ret. Time | Area     | Height  | Area %  | Height % |
|-------|-----------|----------|---------|---------|----------|
| 1     | 26.175    | 32299062 | 581789  | 49.990  | 53.092   |
| 2     | 28.385    | 32312196 | 514033  | 50.010  | 46.908   |
| Total |           | 64611259 | 1095821 | 100.000 | 100.000  |

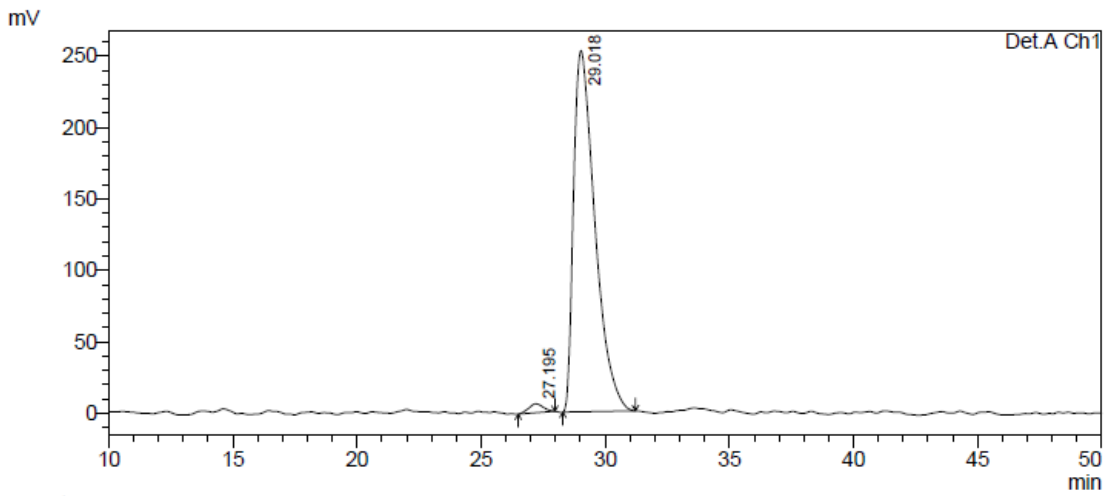

1 Det.A Ch1/210nm

PeakTable

Detector A Ch1 210nm

| Peak# | Ret. Time | Area     | Height | Area %  | Height % |
|-------|-----------|----------|--------|---------|----------|
| 1     | 27.195    | 256918   | 6276   | 1.669   | 2.422    |
| 2     | 29.018    | 15133694 | 252873 | 98.331  | 97.578   |
| Total |           | 15390612 | 259150 | 100.000 | 100.000  |



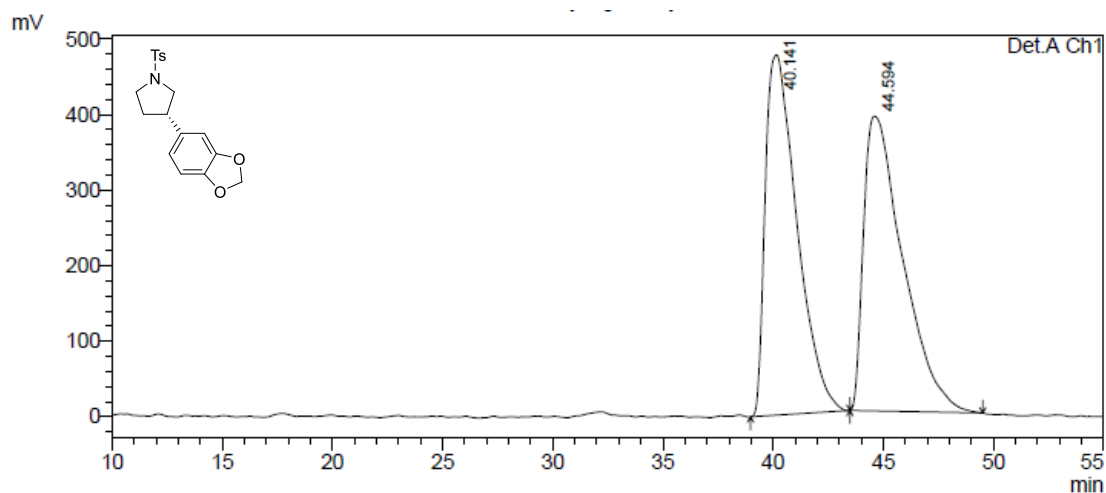

1 Det.A Ch1/210nm

PeakTable

Detector A Ch1 210nm

| Peak# | Ret. Time | Area     | Height | Area %  | Height % |
|-------|-----------|----------|--------|---------|----------|
| 1     | 40.141    | 47706568 | 476817 | 49.687  | 54.999   |
| 2     | 44.594    | 48308539 | 390144 | 50.313  | 45.001   |
| Total |           | 96015107 | 866961 | 100.000 | 100.000  |

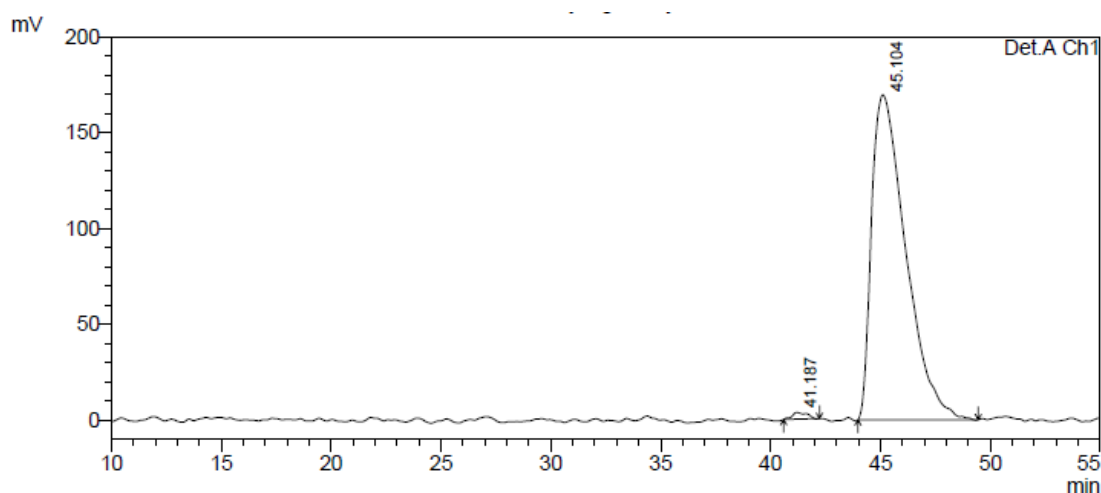

1 Det.A Ch1/210nm

PeakTable

Detector A Ch1 210nm

| Peak# | Ret. Time | Area     | Height | Area %  | Height % |
|-------|-----------|----------|--------|---------|----------|
| 1     | 41.187    | 161999   | 3486   | 0.877   | 2.016    |
| 2     | 45.104    | 18319850 | 169450 | 99.123  | 97.984   |
| Total |           | 18481850 | 172936 | 100.000 | 100.000  |

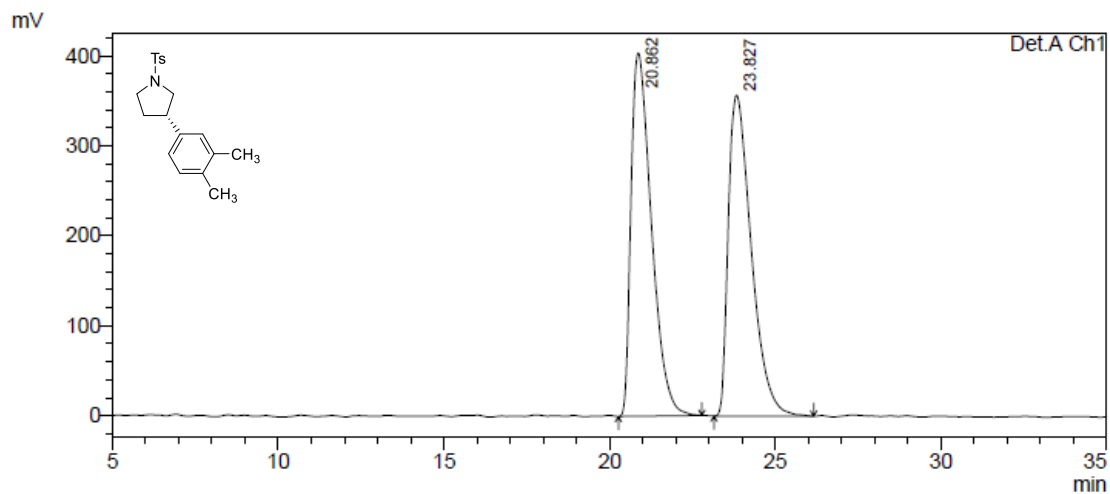

1 Det.A Ch1/210nm

PeakTable

Detector A Ch1 210nm

| Peak# | Ret. Time | Area     | Height | Area %  | Height % |
|-------|-----------|----------|--------|---------|----------|
| 1     | 20.862    | 17280360 | 403484 | 50.095  | 53.092   |
| 2     | 23.827    | 17214619 | 356482 | 49.905  | 46.908   |
| Total |           | 34494978 | 759966 | 100.000 | 100.000  |

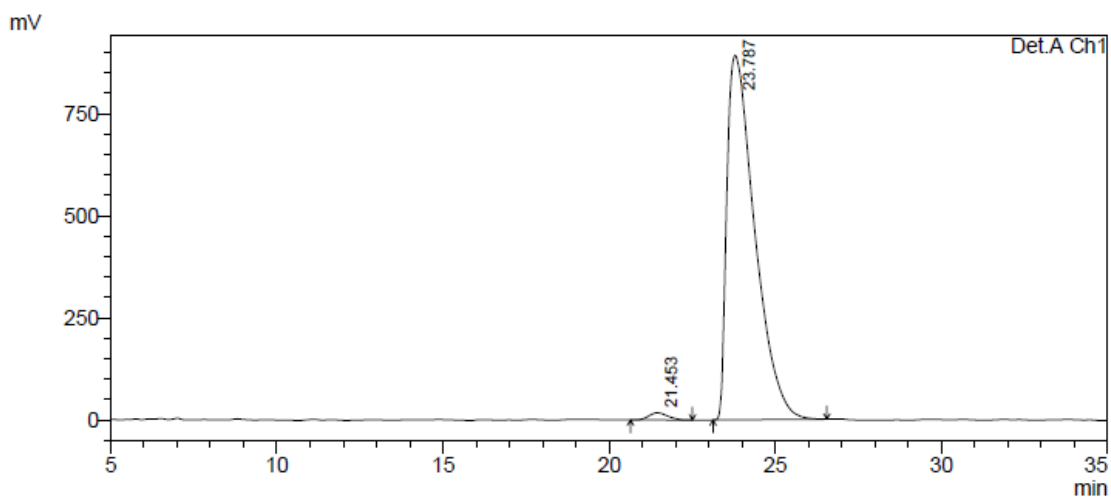

1 Det.A Ch1/210nm

PeakTable

Detector A Ch1 210nm

| Peak# | Ret. Time | Area     | Height | Area %  | Height % |
|-------|-----------|----------|--------|---------|----------|
| 1     | 21.453    | 697610   | 17625  | 1.324   | 1.936    |
| 2     | 23.787    | 51986101 | 892628 | 98.676  | 98.064   |
| Total |           | 52683712 | 910253 | 100.000 | 100.000  |

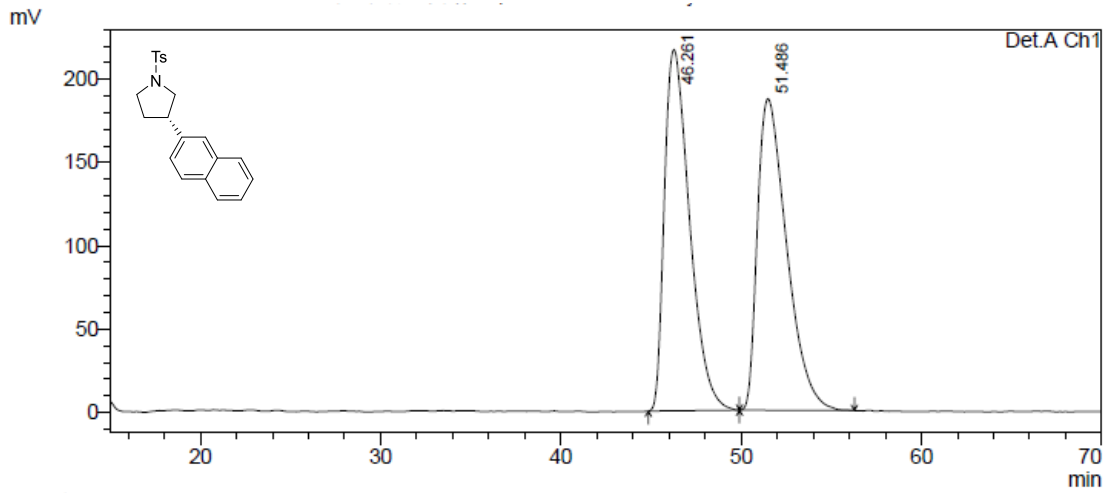

1 Det.A Ch1/210nm

PeakTable

| Detector A Ch1 210nm |           |          |        |         |          |
|----------------------|-----------|----------|--------|---------|----------|
| Peak#                | Ret. Time | Area     | Height | Area %  | Height % |
| 1                    | 46.261    | 21052121 | 216910 | 49.938  | 53.699   |
| 2                    | 51.486    | 21104539 | 187027 | 50.062  | 46.301   |
| Total                |           | 42156660 | 403937 | 100.000 | 100.000  |

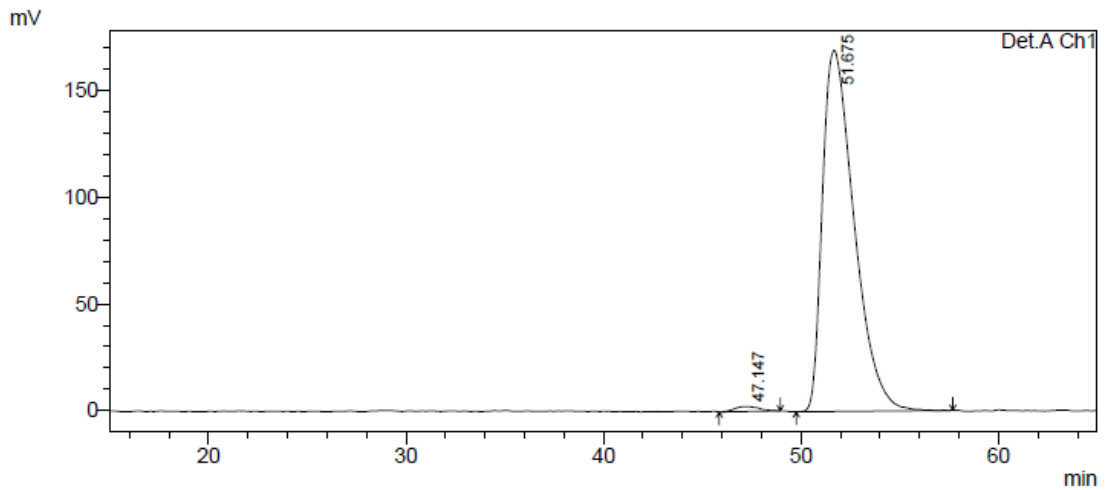

1 Det.A Ch1/210nm

PeakTable

| Detector A Ch1 210nm |           |          |        |         |          |
|----------------------|-----------|----------|--------|---------|----------|
| Peak#                | Ret. Time | Area     | Height | Area %  | Height % |
| 1                    | 47.147    | 196387   | 2258   | 1.029   | 1.317    |
| 2                    | 51.675    | 18891059 | 169115 | 98.971  | 98.683   |
| Total                |           | 19087446 | 171373 | 100.000 | 100.000  |

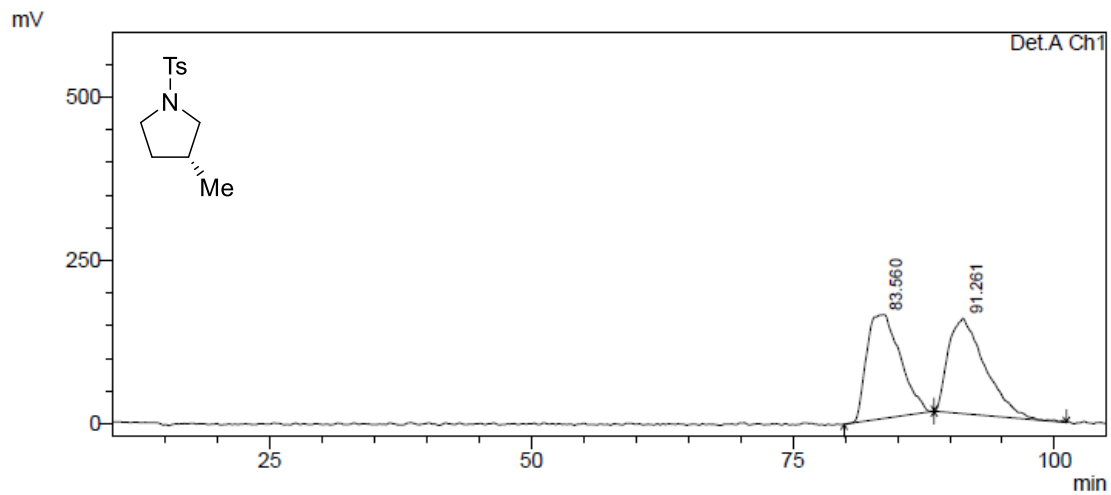

1 Det.A Ch1/210nm

PeakTable

Detector A Ch1 210nm

| Peak# | Ret. Time | Area     | Height | Area %  | Height % |
|-------|-----------|----------|--------|---------|----------|
| 1     | 83.560    | 35671312 | 159253 | 49.907  | 52.171   |
| 2     | 91.261    | 35804713 | 146000 | 50.093  | 47.829   |
| Total |           | 71476025 | 305253 | 100.000 | 100.000  |

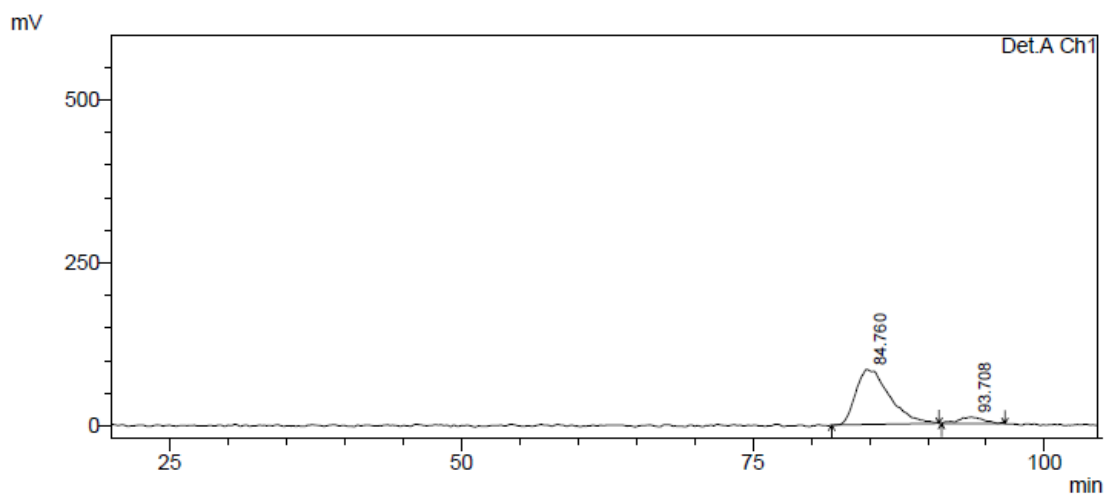

1 Det.A Ch1/210nm

PeakTable

Detector A Ch1 210nm

| Peak# | Ret. Time | Area     | Height | Area %  | Height % |
|-------|-----------|----------|--------|---------|----------|
| 1     | 84.760    | 16966846 | 84580  | 91.683  | 89.507   |
| 2     | 93.708    | 1539099  | 9915   | 8.317   | 10.493   |
| Total |           | 18505945 | 94495  | 100.000 | 100.000  |

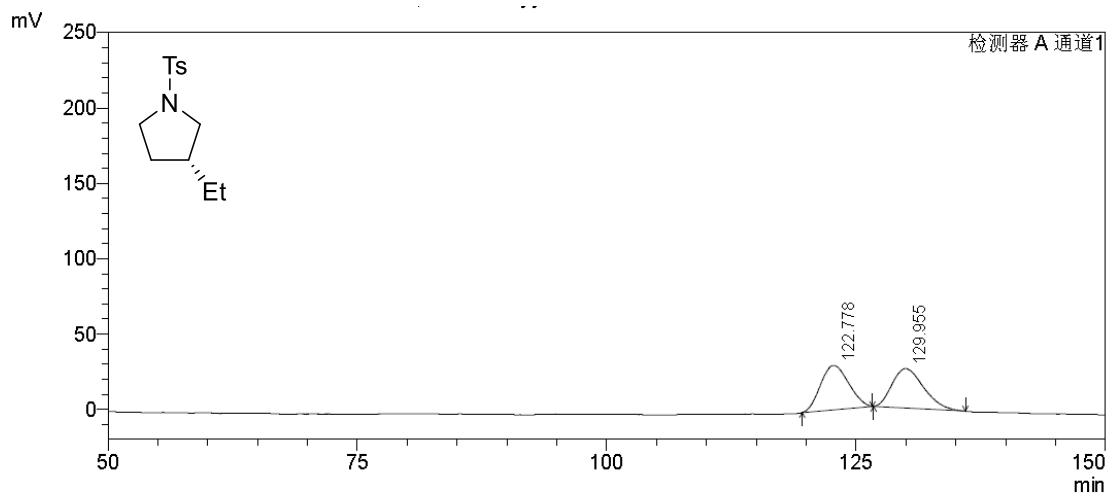

峰表

检测器 A Ch1 210nm

| 峰# | 保留时间    | 面积       | 高度    | 面积 %    | 高度 %    |
|----|---------|----------|-------|---------|---------|
| 1  | 122.778 | 5770289  | 29408 | 49.924  | 52.927  |
| 2  | 129.955 | 5787886  | 26156 | 50.076  | 47.073  |
| 总计 |         | 11558175 | 55564 | 100.000 | 100.000 |

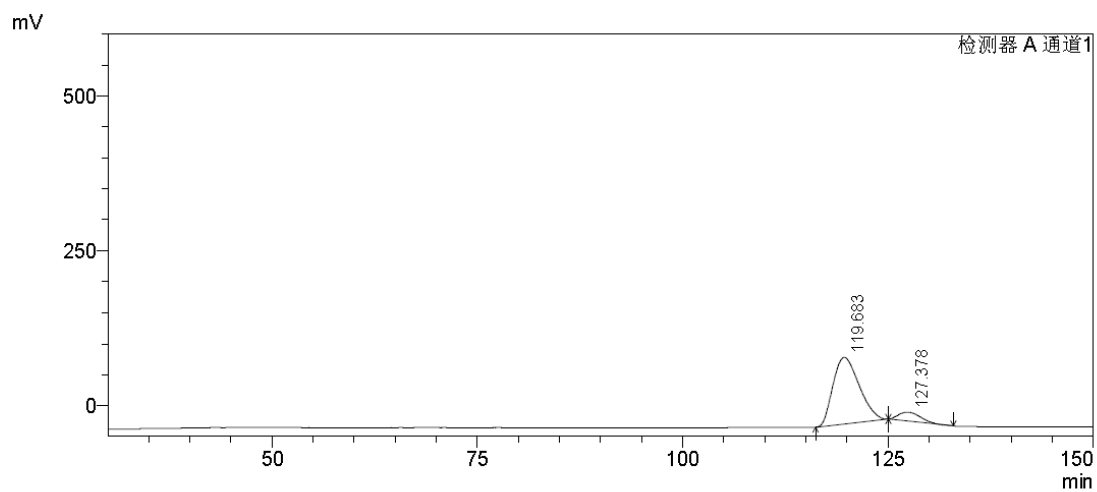

峰表

检测器 A Ch1 210nm

| 峰# | 保留时间    | 面积       | 高度     | 面积 %    | 高度 %    |
|----|---------|----------|--------|---------|---------|
| 1  | 119.683 | 23907489 | 107735 | 89.832  | 88.039  |
| 2  | 127.378 | 2706041  | 14638  | 10.168  | 11.961  |
| 总计 |         | 26613529 | 122373 | 100.000 | 100.000 |

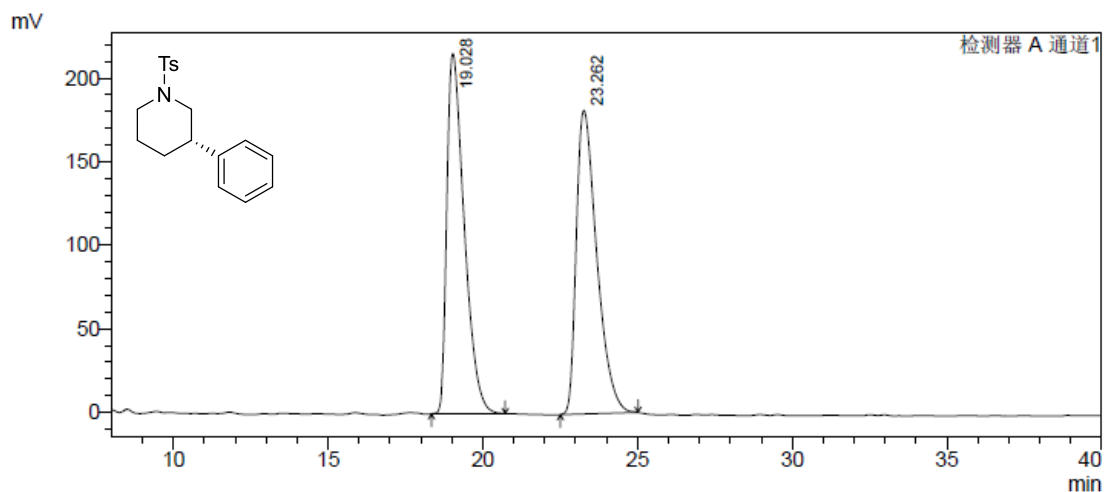

1 检测器 A 通道1/210nm

峰表

检测器 A Ch1 210nm

| 峰# | 保留时间   | 面积       | 高度     | 面积 %    | 高度 %    |
|----|--------|----------|--------|---------|---------|
| 1  | 19.028 | 8417396  | 215480 | 50.175  | 54.268  |
| 2  | 23.262 | 8358520  | 181588 | 49.825  | 45.732  |
| 总计 |        | 16775916 | 397068 | 100.000 | 100.000 |

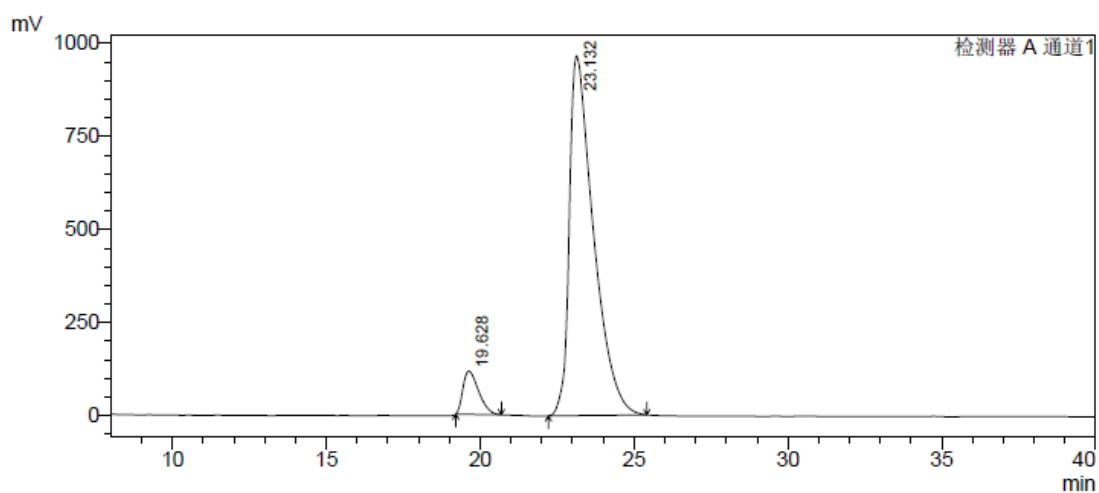

1 检测器 A 通道1/210nm

峰表

检测器 A Ch1 210nm

| 峰# | 保留时间   | 面积       | 高度      | 面积 %    | 高度 %    |
|----|--------|----------|---------|---------|---------|
| 1  | 19.628 | 4113863  | 115973  | 7.220   | 10.712  |
| 2  | 23.132 | 52865876 | 966667  | 92.780  | 89.288  |
| 总计 |        | 56979739 | 1082640 | 100.000 | 100.000 |

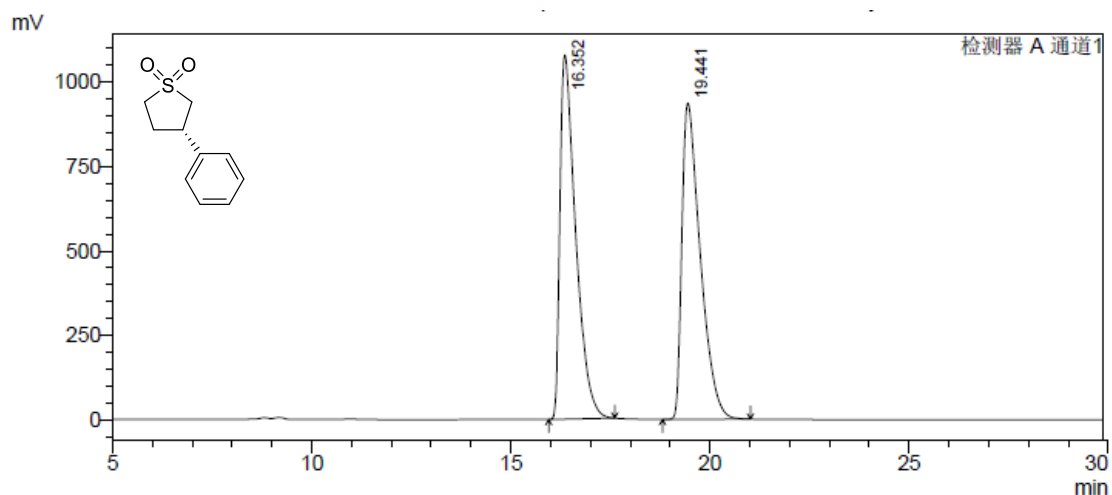

1 检测器 A 通道1/210nm

峰表

检测器 A Ch1 210nm

| 峰# | 保留时间   | 面积       | 高度      | 面积 %    | 高度 %    |
|----|--------|----------|---------|---------|---------|
| 1  | 16.352 | 29604716 | 1079468 | 49.637  | 53.532  |
| 2  | 19.441 | 30037781 | 937031  | 50.363  | 46.468  |
| 总计 |        | 59642497 | 2016499 | 100.000 | 100.000 |

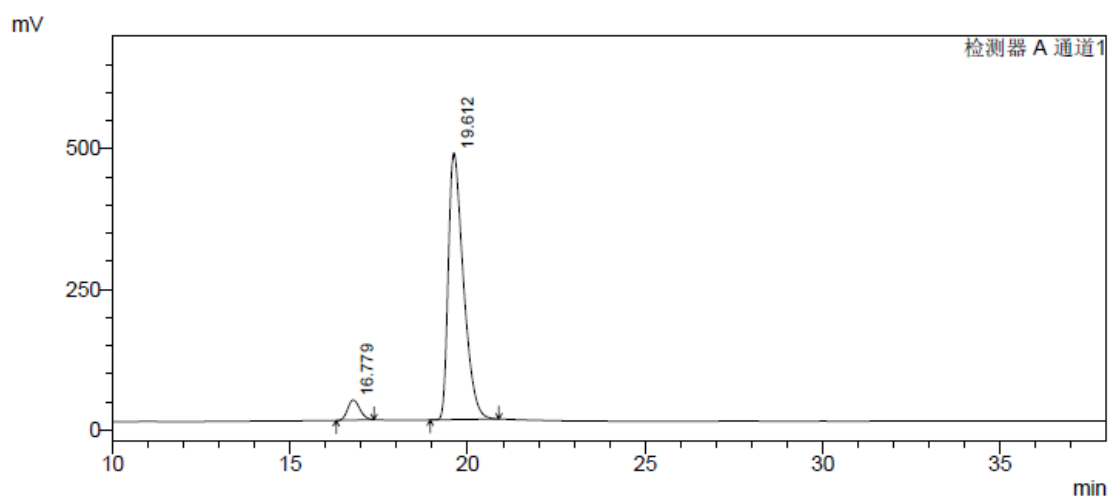

1 检测器 A 通道1/210nm

峰表

检测器 A Ch1 210nm

| 峰# | 保留时间   | 面积       | 高度     | 面积 %    | 高度 %    |
|----|--------|----------|--------|---------|---------|
| 1  | 16.779 | 851048   | 36099  | 5.717   | 7.067   |
| 2  | 19.612 | 14034199 | 474677 | 94.283  | 92.933  |
| 总计 |        | 14885247 | 510775 | 100.000 | 100.000 |

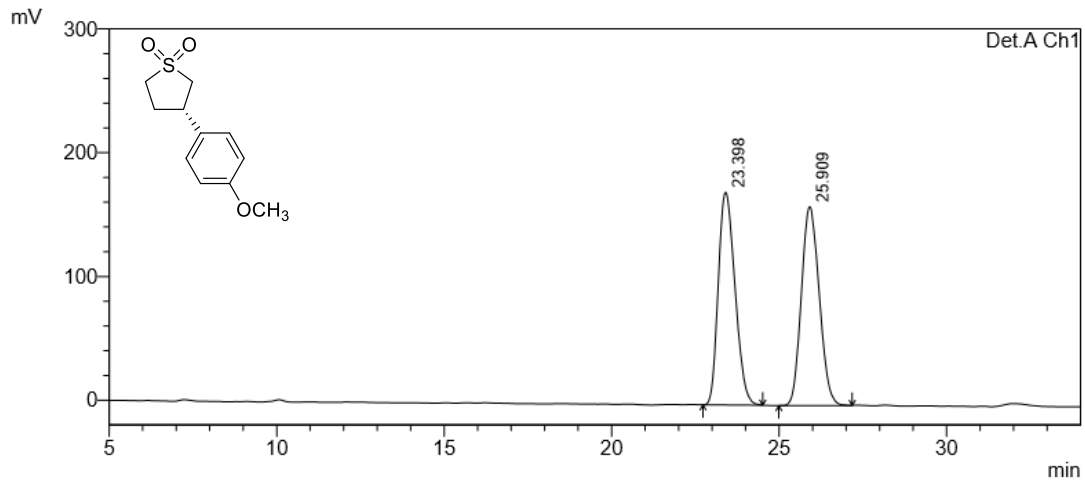

1 Det.A Ch1/210nm

PeakTable

Detector A Ch1 210nm

| Peak# | Ret. Time | Area     | Height | Area %  | Height % |
|-------|-----------|----------|--------|---------|----------|
| 1     | 23.398    | 5941315  | 171665 | 49.868  | 51.648   |
| 2     | 25.909    | 5972726  | 160710 | 50.132  | 48.352   |
| Total |           | 11914041 | 332375 | 100.000 | 100.000  |

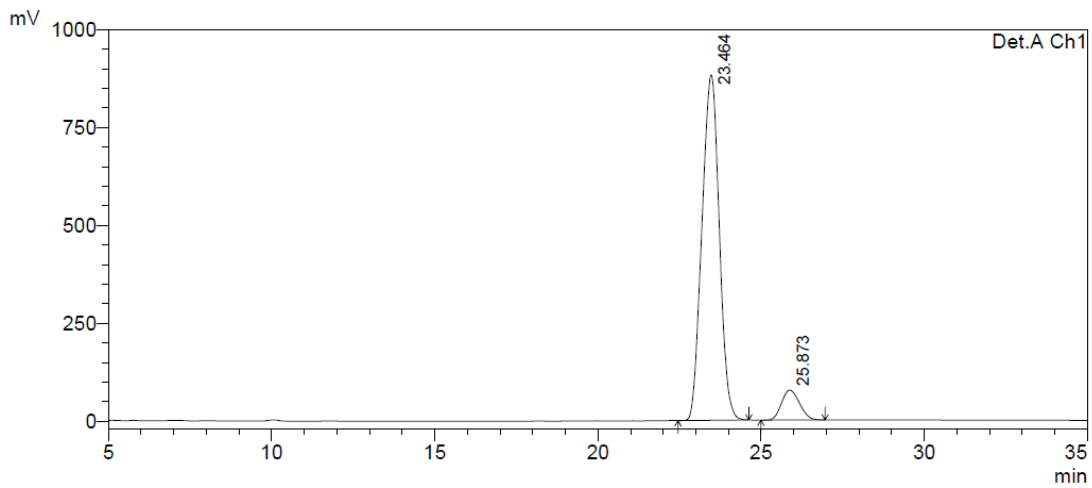

1 Det.A Ch1/210nm

PeakTable

Detector A Ch1 210nm

| Peak# | Ret. Time | Area     | Height | Area %  | Height % |
|-------|-----------|----------|--------|---------|----------|
| 1     | 23.464    | 32534211 | 882222 | 91.774  | 92.037   |
| 2     | 25.873    | 2915977  | 76324  | 8.226   | 7.963    |
| Total |           | 35450188 | 958546 | 100.000 | 100.000  |



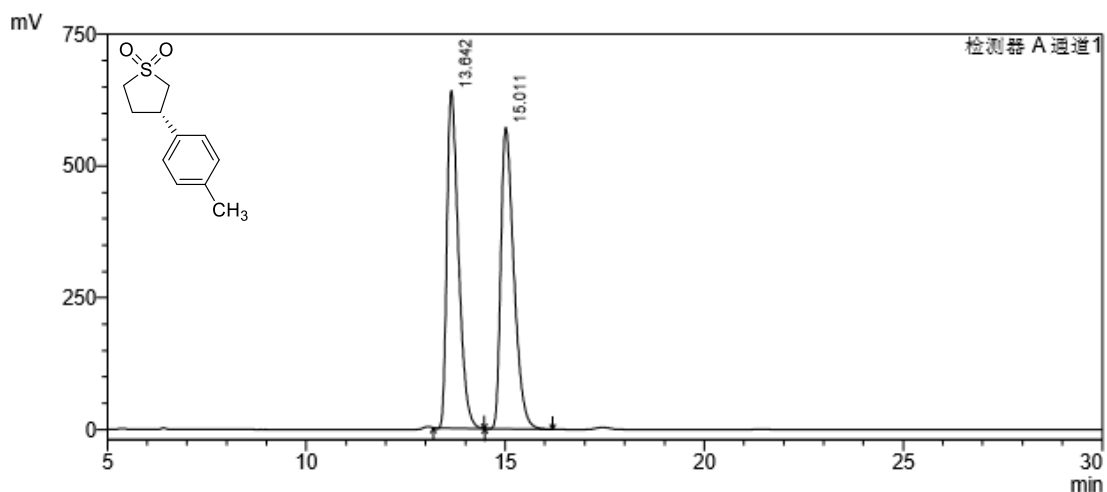

1 检测器 A 通道 1/210nm

峰表

Detector A Ch1 210nm

| 峰# | 保留时间   | 面积       | 高度      | 面积 %    | 高度 %    |
|----|--------|----------|---------|---------|---------|
| 1  | 13.642 | 12898671 | 640804  | 49.771  | 52.845  |
| 2  | 15.011 | 13017158 | 571806  | 50.229  | 47.155  |
| 总计 |        | 25915829 | 1212610 | 100.000 | 100.000 |

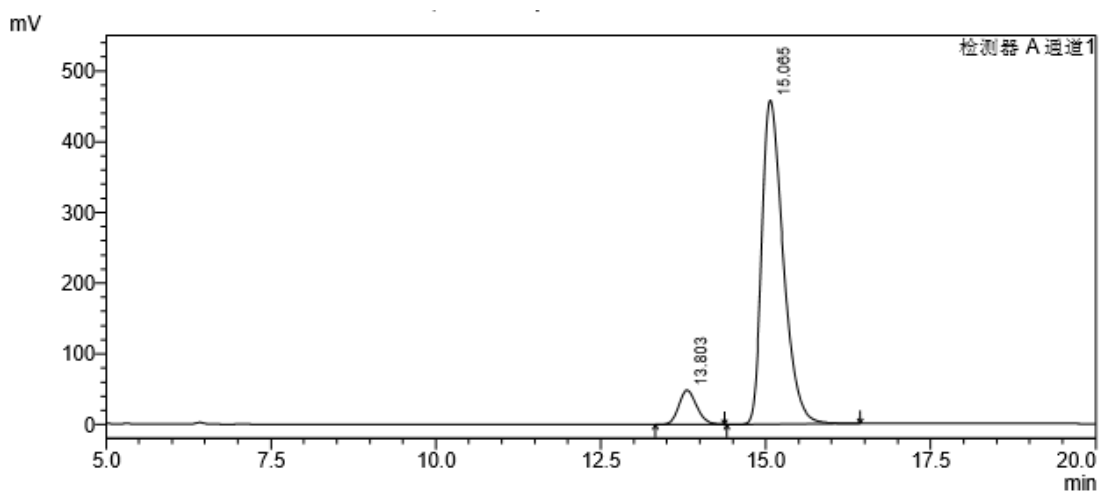

1 检测器 A 通道 1/210nm

峰表

Detector A Ch1 210nm

| 峰# | 保留时间   | 面积       | 高度     | 面积 %    | 高度 %    |
|----|--------|----------|--------|---------|---------|
| 1  | 13.803 | 921134   | 48617  | 8.218   | 9.603   |
| 2  | 15.065 | 10287172 | 457658 | 91.782  | 90.397  |
| 总计 |        | 11208306 | 506275 | 100.000 | 100.000 |

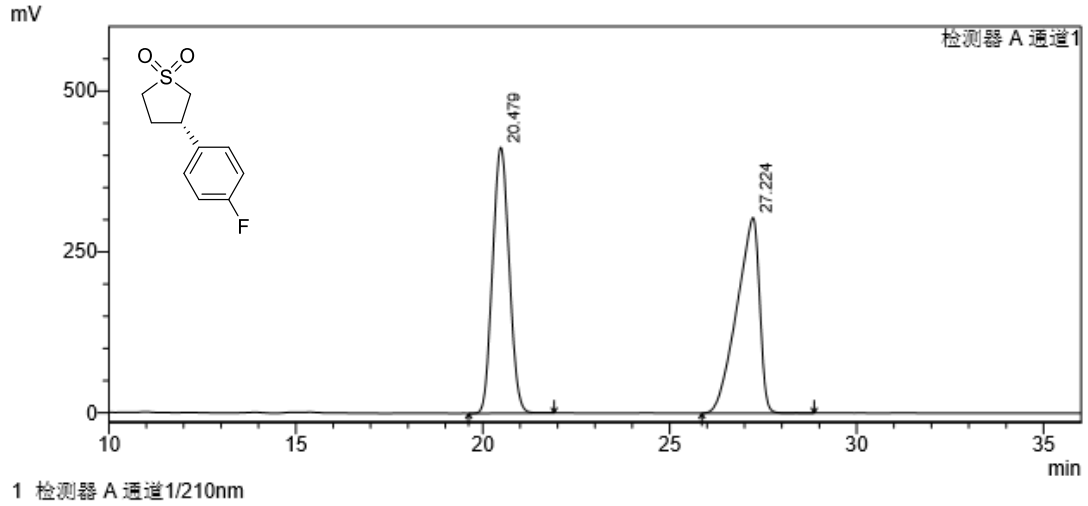

1 检测器 A 通道1/210nm

峰表

检测器 A Ch1 210nm

| 峰# | 保留时间   | 面积       | 高度     | 面积 %    | 高度 %    |
|----|--------|----------|--------|---------|---------|
| 1  | 20.479 | 12719718 | 412945 | 49.839  | 57.620  |
| 2  | 27.224 | 12801844 | 303721 | 50.161  | 42.380  |
| 总计 |        | 25521561 | 716666 | 100.000 | 100.000 |

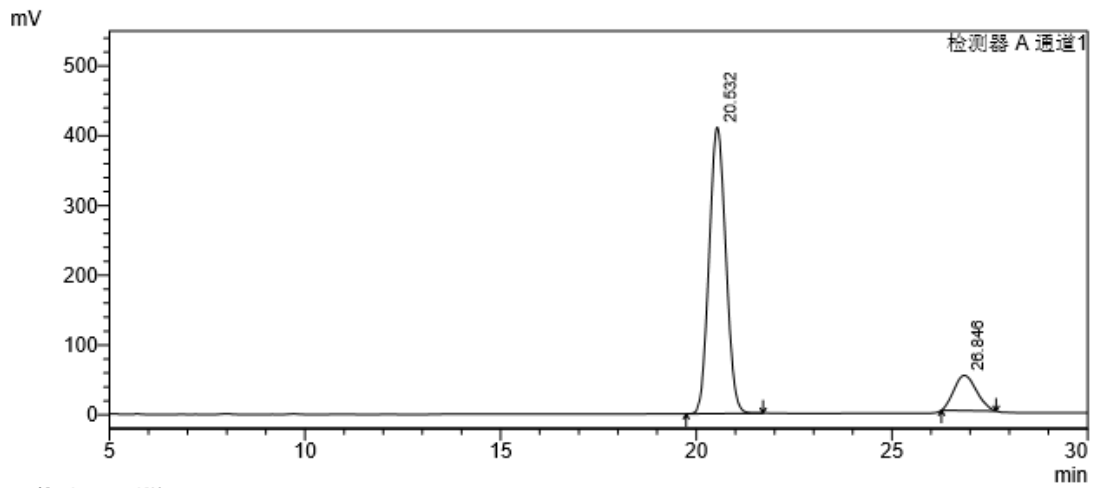

1 检测器 A 通道1/210nm

峰表

检测器 A Ch1 210nm

| 峰# | 保留时间   | 面积       | 高度     | 面积 %    | 高度 %    |
|----|--------|----------|--------|---------|---------|
| 1  | 20.532 | 12190924 | 410554 | 85.713  | 89.054  |
| 2  | 26.846 | 2031992  | 50460  | 14.287  | 10.946  |
| 总计 |        | 14222916 | 461014 | 100.000 | 100.000 |

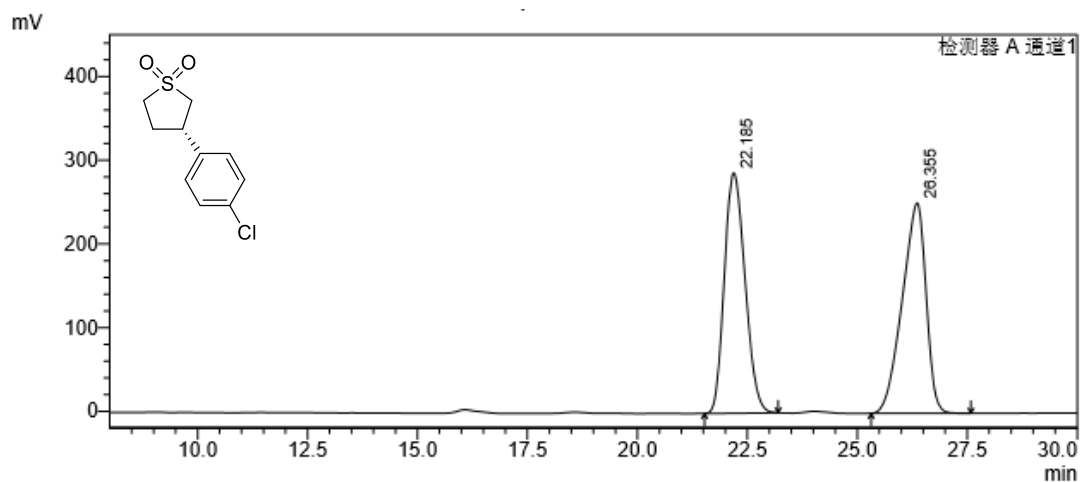

1 检测器 A 通道1/210nm

峰表

检测器 A Ch1 210nm

| 峰# | 保留时间   | 面积       | 高度     | 面积 %    | 高度 %    |
|----|--------|----------|--------|---------|---------|
| 1  | 22.185 | 9404398  | 287262 | 49.897  | 53.327  |
| 2  | 26.355 | 9443077  | 251416 | 50.103  | 46.673  |
| 总计 |        | 18847475 | 538678 | 100.000 | 100.000 |

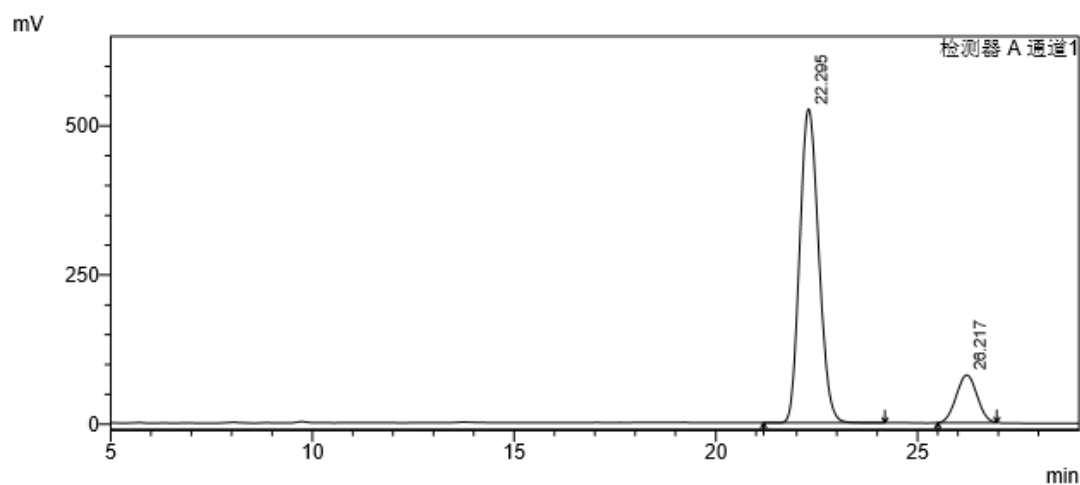

1 检测器 A 通道1/210nm

峰表

检测器 A Ch1 210nm

| 峰# | 保留时间   | 面积       | 高度     | 面积 %    | 高度 %    |
|----|--------|----------|--------|---------|---------|
| 1  | 22.295 | 17197268 | 526261 | 85.761  | 86.801  |
| 2  | 26.217 | 2855369  | 80025  | 14.239  | 13.199  |
| 总计 |        | 20052637 | 606286 | 100.000 | 100.000 |

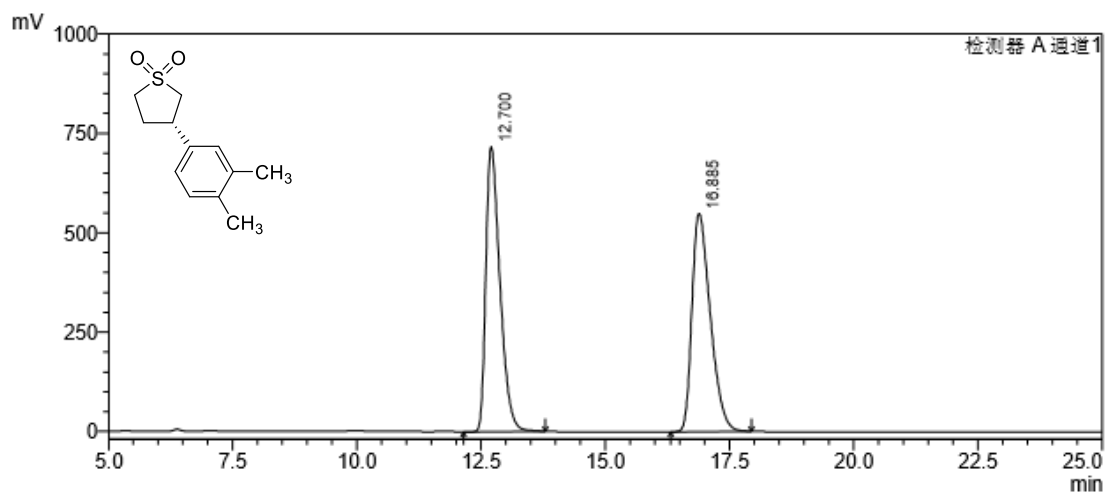

1 检测器 A 通道1/210nm

峰表

Detector A Ch1 210nm

| 峰# | 保留时间   | 面积       | 高度      | 面积 %    | 高度 %    |
|----|--------|----------|---------|---------|---------|
| 1  | 12.700 | 14167408 | 716678  | 50.023  | 56.635  |
| 2  | 16.885 | 14154493 | 548759  | 49.977  | 43.365  |
| 总计 |        | 28321900 | 1265437 | 100.000 | 100.000 |

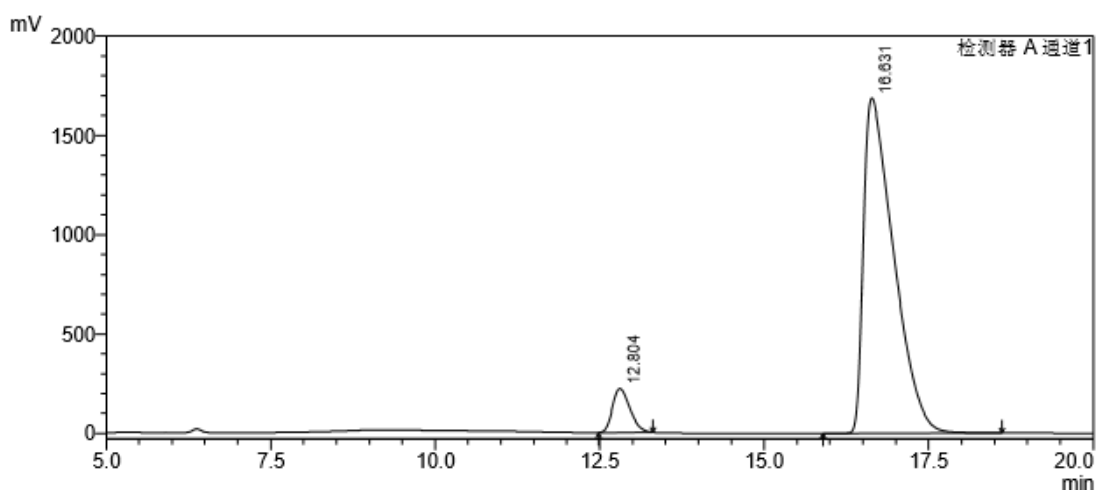

1 检测器 A 通道1/210nm

峰表

Detector A Ch1 210nm

| 峰# | 保留时间   | 面积       | 高度      | 面积 %    | 高度 %    |
|----|--------|----------|---------|---------|---------|
| 1  | 12.804 | 4091996  | 221449  | 7.071   | 11.601  |
| 2  | 16.631 | 53780950 | 1687392 | 92.929  | 88.399  |
| 总计 |        | 57872946 | 1908841 | 100.000 | 100.000 |

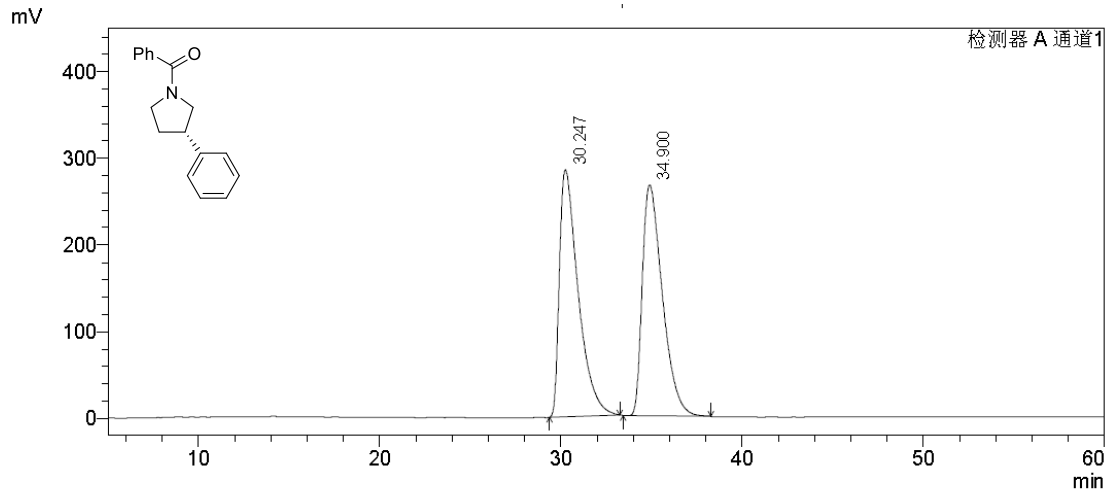

1 检测器 A 通道1/210nm

峰表

检测器 A Ch1 210nm

| 峰# | 保留时间   | 面积       | 高度     | 面积 %    | 高度 %    |
|----|--------|----------|--------|---------|---------|
| 1  | 30.247 | 20517347 | 285140 | 49.961  | 51.698  |
| 2  | 34.900 | 20548976 | 266411 | 50.039  | 48.302  |
| 总计 |        | 41066323 | 551552 | 100.000 | 100.000 |

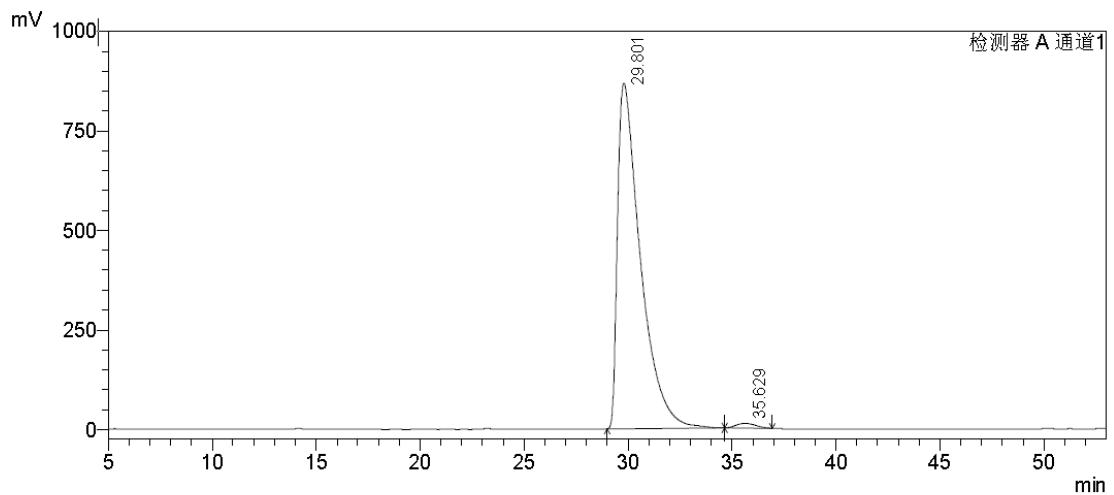

1 检测器 A 通道1/210nm

峰表

检测器 A Ch1 210nm

| 峰# | 保留时间   | 面积       | 高度     | 面积 %    | 高度 %    |
|----|--------|----------|--------|---------|---------|
| 1  | 29.801 | 66398522 | 867849 | 98.801  | 98.608  |
| 2  | 35.629 | 805754   | 12255  | 1.199   | 1.392   |
| 总计 |        | 67204277 | 880104 | 100.000 | 100.000 |

## 6. Single Crystal of Enantioenriched **2a** and **4a**.

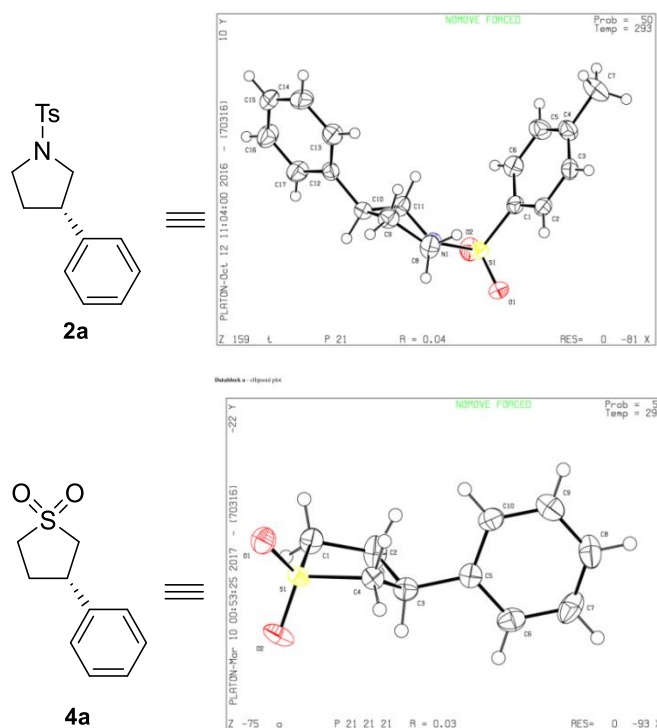

The crystal data of compound (**2a**, **4a**) have been deposited in CCDC with numbers 1538195 and 1538169, respectively. Chemical Formula:  $C_{17}H_{19}NO_2S$  (**2a**),  $C_{10}H_{12}O_2S$  (**4a**); Molecular Weight: 301.4040 (**2a**), 196.2640 (**4a**); Crystal Color: Colorless. The crystal was obtained from an EtOAc/PE system at room temperature.

## 7. References.

- 1 A. P. Blum, T Ritter, R. H. Grubbs, *Organometallics*, 2007, **26**, 2122.
- 2 P. J. Harrington, K. A. DiFiore, *Tetrahedron Lett.*, 1987, **28**, 495.
- 3 J. Xia, G. Yang, R. Zhuge, Y. Liu, W. Zhang, *Chem. Eur. J.*, 2016, **22**, 18354.
- 4 C. Chen, S. Jin, Z. Zhang, B. Wei, H. Wang, K. Zhang, H. Lv, X.-Q. Dong, X. Zhang, *J. Am. Chem. Soc.*, 2016, **138**, 9017.
- 5 Y. Liu, W. Zhang, *Angew. Chem. Int. Ed.*, 2013, **52**, 2203.
